# Supplementary material for: GLP-1 RAs and SGLT-2 Inhibitors for Insulin Resistance in Nonalcoholic Fatty Liver Disease: Systematic Review and Network Meta-Analysis
Source: PubMed Central journal article supplement (PMC9325993; doi:10.3389/fendo.2022.923606), 2022-07-13
Supplement: DataSheet_1.pdf [file DataSheet_1.pdf]

# Appendix 1 Search strategies

## Detailed search strategy for EMBASE

#1'nonalcoholic fatty liver/exp OR "nonalcoholic fatty liver"  
#2'sodium glucose cotransporter 2 inhibitor'lexp OR 'sodium glucose cotransporter 2 inhibitor'#1  
#3'dipeptidyl peptidase iv inhibitorlexp OR 'dipeptidyl peptidase iv inhibitor"  
#4'glp 1"/exp OR 'glp 1'  
#5'glucagon like peptide 1"/exp OR 'glucagon like peptide 1'OR'glucagon like peptide 1 receptor agonistlexp OR'glucagon likepeptide 1 receptor agonist"  
#6'peroxisome proliferator activated receptorlexp OR 'peroxisome proliferator activated receptor' OR 'peroxisome proliferator activated receptor gamma'exp OR 'peroxisome proliferator activated receptor gamma' OR 'peroxisome proliferator activatedreceptor alpha'/exp OR "peroxisome proliferator activated receptor alpha"  
#7'metformin'lexp OR metformin  
#8' #2 OR #3 OR #4 OR #5 OR#6 OR #7  
#9'#1AND #8  
#11'#9AND 'randomized controlled trial'/de

# Detailed search strategy for Cochrane

- #1 (NAFLD):ti,ab,kw
- #2 MeSH descriptor: [Non-alcoholic Fatty Liver Disease] explode all trees
- #3 #1 OR #2
- #4 metformin:ti,ab,kw
- #5 (sulfonylurea\* or sulphonylurea\*):ti,ab,kw
- #6 acetohexamide:ti,ab,kw
- #7 carbutamide:ti,ab,kw
- #8 chlopropramide:ti,ab,kw
- #9 glibenclamide:ti,ab,kw
- #10 gliclazide:ti,ab,kw
- #11 glimepiride:ti,ab,kw
- #12 gliquidone:ti,ab,kw
- #13 glyburide:ti,ab,kw
- #14 glibornuride:ti,ab,kw
- #15 glipizide:ti,ab,kw
- #16 glycopyramide:ti,ab,kw
- #17 tolazimide:ti,ab,kw
- #18 (glitazone near/1 (derivative\* or analogue\*)):ti,ab,kw
- #19 thiazolidinedione:ti,ab,kw
- #20 rivoglitazone:ti,ab,kw
- #21 pioglitazone:ti,ab,kw
- #22 rosiglitazone:ti,ab,kw
- #23 ("glucagon-like peptide 1 receptor inhibitor" or "glucagon-like peptide 1 receptor agonist" or "glucagon-like peptide 1 inhibitor" or "glucagon-like peptide 1 agonist" or "GLP-1 receptor inhibitor" or "GLP-1 receptor agonist" or "GLP-1 inhibitor" or "GLP-1 agonist"):ti,ab,kw
- #24 ("glucagon-like peptide 1 receptor inhibitors" or "glucagon-like peptide 1 receptor agonists" or "glucagon-like peptide 1 inhibitors" or "glucagon-like peptide 1 agonists" or "GLP-1 receptor inhibitors" or "GLP-1 receptor agonists" or "GLP-1 inhibitors" or "GLP-1 agonists"):ti,ab,kw
- #25 albiglutide:ti,ab,kw
- #26 dulaglutide:ti,ab,kw
- #27 exenatide:ti,ab,kw
- #28 "exendin 4":ti,ab,kw
- #29 liraglutide:ti,ab,kw
- #30 lixisenatide:ti,ab,kw
- #31 semaglutide:ti,ab,kw
- #32 taspoglutide:ti,ab,kw
- #33 ("dipeptidyl-peptidase IV Inhibitor" or "dipeptidylpeptidase 4 Inhibitor" or dipeptidyl-peptidase IV Inhibitors or "dipeptidyl-peptidase 4 Inhibitors"):ti,ab,kw
- #34 ((DPP4 or DPP 4 or DPP IV) next inhibitor\*):ti,ab,kw

#35 alogliptin:ti,ab,kw  
#36 anagliptin:ti,ab,kw  
#37 gemigliptin:ti,ab,kw  
#38 linagliptin:ti,ab,kw  
#39 omarigliptin:ti,ab,kw  
#40 saxagliptin:ti,ab,kw  
#41 sitagliptin:ti,ab,kw  
#42 teneligliptin:ti,ab,kw  
#43 vildagliptin:ti,ab,kw  
#44 evogliptin:ti,ab,kw  
#45 dutogliptin:ti,ab,kw  
#46 retagliptin:ti,ab,kw  
#47 ("sodium glucose transporter 2 inhibitor" or "sodium glucose transporter ii inhibitor" or "SGLT 2 inhibitor" or "sodium glucose transporter 2 inhibitors" or "sodium glucose transporter ii inhibitors" or "SGLT 2 inhibitors"):ti,ab,kw  
#48 ("sodium glucose cotransporter" near/3 inhibitor\*):ti,ab,kw  
#49 ("sodium glucose co-transporter" near/3 inhibitor\*):ti,ab,kw  
#50 remogliflozin:ti,ab,kw  
#51 sergliflozin:ti,ab,kw  
#52 tofogliflozin:ti,ab,kw  
#53 bexagliflozin:ti,ab,kw  
#54 licogliflozin:ti,ab,kw  
#55 luseogliflozin:ti,ab,kw  
#56 canagliflozin:ti,ab,kw  
#57 dapagliflozin:ti,ab,kw  
#58 empagliflozin:ti,ab,kw  
#59 ertugliflozin:ti,ab,kw  
#60 henagliflozin:ti,ab,kw  
#61 ipragliflozin:ti,ab,kw  
#62 sotagliflozin:ti,ab,kw  
#63 sotagliflozin:ti,ab,kw  
#64 OR#5-#63  
#65 #3 OR #64

# Detailed search strategy for PubMed.

| Aa<br>No. | ☰ Search item                                                                                                                                                                                                                                                                                                                                                                                                                                                                                                                                                                                                                      |
|-----------|------------------------------------------------------------------------------------------------------------------------------------------------------------------------------------------------------------------------------------------------------------------------------------------------------------------------------------------------------------------------------------------------------------------------------------------------------------------------------------------------------------------------------------------------------------------------------------------------------------------------------------|
| #1        | "Non-alcoholic Fatty Liver Disease" [Mesh Terms]                                                                                                                                                                                                                                                                                                                                                                                                                                                                                                                                                                                   |
| #2        | Steatohepatitis, Nonalcoholic [Title/Abstract] OR Steatohepatitides, Nonalcoholic [Title/Abstract] OR Nonalcoholic Steatohepatitides [Title/Abstract] OR Nonalcoholic Steatohepatitis [Title/Abstract] OR Nonalcoholic Fatty Livers [Title/Abstract] OR Nonalcoholic Fatty Liver [Title/Abstract] OR Livers, Nonalcoholic Fatty [Title/Abstract] OR Liver, Nonalcoholic Fatty [Title/Abstract] OR Fatty Livers, Nonalcoholic [Title/Abstract])) OR Fatty Liver, Nonalcoholic [Title/Abstract] OR Nonalcoholic Fatty Liver Disease [Title/Abstract] OR NAFLD [Title/Abstract] OR Non alcoholic Fatty Liver Disease [Title/Abstract] |
| #3        | #1 OR #2                                                                                                                                                                                                                                                                                                                                                                                                                                                                                                                                                                                                                           |
| #3        | "antidiabetic" [Mesh Terms]                                                                                                                                                                                                                                                                                                                                                                                                                                                                                                                                                                                                        |
| #5        | ("Elafibranor"[Title/Abstract] OR "lanifibranor"[Title/Abstract] OR "Liraglutide" [Title/Abstract] OR "semaglutide"[Title/Abstract] OR "pioglitazone"[Title/Abstract] OR "Empagliflozin"[Title/Abstract] OR "Canagliflozin"[Title/Abstract] OR "Dapagliflozin"[Title/Abstract] OR "Empagliflozin"[Title/Abstract] OR "Ipragliflozin" [Title/Abstract] OR "Luseogliflozin"[Title/Abstract] OR "Tofogliflozin" [Title/Abstract] OR "metformin"[Title/Abstract] OR "PPAR"[Title/Abstract] OR "SGLT"[Title/Abstract] OR "DPP-4"[Title/Abstract] OR "GLP-1"[Title/Abstract])                                                            |
| #6        | #4 AND #5                                                                                                                                                                                                                                                                                                                                                                                                                                                                                                                                                                                                                          |
| #7        | Randomized controlled trial [Publication Type] AND Controlled clinical trial [Publication Type]                                                                                                                                                                                                                                                                                                                                                                                                                                                                                                                                    |
| #8        | Randomized [Title/Abstract] OR random allocation [Title/Abstract]                                                                                                                                                                                                                                                                                                                                                                                                                                                                                                                                                                  |
| #9        | #7 OR #8                                                                                                                                                                                                                                                                                                                                                                                                                                                                                                                                                                                                                           |
| #10       | #3 AND #6 AND #9                                                                                                                                                                                                                                                                                                                                                                                                                                                                                                                                                                                                                   |



## Appendix 2 Included studies

| STUDY ID          | Trial registration   | TIME | Country   | Randomised treatments | DOSE                                                                                                                                                                                   | N  | SEX (N of men) | AGE (Mean±SD) | FPG (mmol/L) | T2DM or not                                   | Combined therapy                                                                                                                              | Lifestyle                                                                                                                                                                                                                                                                                                                                                  |
|-------------------|----------------------|------|-----------|-----------------------|----------------------------------------------------------------------------------------------------------------------------------------------------------------------------------------|----|----------------|---------------|--------------|-----------------------------------------------|-----------------------------------------------------------------------------------------------------------------------------------------------|------------------------------------------------------------------------------------------------------------------------------------------------------------------------------------------------------------------------------------------------------------------------------------------------------------------------------------------------------------|
| Aithal-2008       | ISRCTN: 10319160     | 48W  | UK        | placebo               | /                                                                                                                                                                                      | 37 | 19             | 51.4± 35.4    | 5.6±0.9      | ×                                             | NA                                                                                                                                            | ✓ Patients were seen by a dietician and were instructed to reduce their calorie intake by 500 Kcal/day as well as to perform modest exercise (such as walking, swimming, gardening, and so forth) regularly for 30 – 40 minutes per day at least 5 days per week.                                                                                          |
|                   |                      |      |           | TZD                   | 30 mg/day                                                                                                                                                                              | 37 | 26             | 50.2± 33.1    | 5.7±1.6      |                                               |                                                                                                                                               |                                                                                                                                                                                                                                                                                                                                                            |
| Anushiravani-2019 | ISRCTN: 10319160     | 12W  | Iran      | placbo                | /                                                                                                                                                                                      | 30 |                |               | NA           | ×                                             | NA                                                                                                                                            | ✓ 500 kcal/day deficit from weight-maintaining caloric intake                                                                                                                                                                                                                                                                                              |
|                   |                      |      |           | metformin             | 500 mg/day                                                                                                                                                                             | 30 | 77             | 47.0±9.1      | NA           |                                               |                                                                                                                                               |                                                                                                                                                                                                                                                                                                                                                            |
| Aso-2019          | UMIN00022155         | 24 W | Japan     | SGLT-2                | 5 mg/d                                                                                                                                                                                 | 33 | 19             | 56.2 ± 11.5   | 7.66±3.01    | ✓                                             | standard treatment                                                                                                                            | NA                                                                                                                                                                                                                                                                                                                                                         |
|                   |                      |      |           | standard treatment    | /                                                                                                                                                                                      | 24 | 15             | 57.1 ± 13.8   | 7.59±2.29    |                                               |                                                                                                                                               |                                                                                                                                                                                                                                                                                                                                                            |
| Balas-2007        | NA                   | 24W  | USA&Italy | placbo                | /                                                                                                                                                                                      | 14 | 5              | 48.4 ± 3.1    | 6.22±0.44    | ✓                                             | NA                                                                                                                                            | ✓ reduce their caloric intake by ~500 kcal/day                                                                                                                                                                                                                                                                                                             |
|                   |                      |      |           | TZD                   | 30 mg/day titrated after 2months to 45mg/day                                                                                                                                           | 21 | 11             | 51 ± 1.6      | 5.39±0.17    |                                               |                                                                                                                                               |                                                                                                                                                                                                                                                                                                                                                            |
| Belfort-2006      | NCT00227110          | 24W  | USA       | placbo                | /                                                                                                                                                                                      | 21 | 7              | 51±10         | 6.39±1.56    | impaired glucose tolerance or type 2 diabetes | NA                                                                                                                                            | ✓ hypocaloric diet (a reduction of 500 kcal per day in relation to the calculated daily intake required to maintain body weight)                                                                                                                                                                                                                           |
|                   |                      |      |           | TZD                   | 45 mg daily                                                                                                                                                                            | 26 | 14             | 51±7          | 6.61±1.94    |                                               |                                                                                                                                               |                                                                                                                                                                                                                                                                                                                                                            |
| Bell-2012         | NCT00063622          | 96W  | USA       | Placebo               | /                                                                                                                                                                                      | 82 | NA             | NA            | NA           | ×                                             | NA                                                                                                                                            | NA                                                                                                                                                                                                                                                                                                                                                         |
|                   |                      |      |           | TZD                   | 30mg daily                                                                                                                                                                             | 80 | NA             | NA            | NA           |                                               |                                                                                                                                               |                                                                                                                                                                                                                                                                                                                                                            |
| Chehrehgosha-2021 | IRCT20190122042450N3 | 24W  | Iran      | placebo               | /                                                                                                                                                                                      | 37 | 14             | 51.8 ± 7.8    | 8.68±1.89    | ✓                                             | stain                                                                                                                                         | ✓ Participants were asked to perform moderate intensity physical activity based on a metabolic equivalent task (METs) at least 3 times a week, and they were encouraged to follow the recommendation at least 45 min without interruption during the study period. Participants were given standard dietary advice as well.                                |
|                   |                      |      |           | SGLT-2                | 30mg                                                                                                                                                                                   | 35 | 15             | 50.5 ± 8.4    | 8.31±2.34    |                                               |                                                                                                                                               |                                                                                                                                                                                                                                                                                                                                                            |
| Cusi-2016         | NCT00994682          | 72M  | USA       | Placebo               | /                                                                                                                                                                                      | 51 | 35             | 49±11         | 6.78±1.51    | ✓                                             | NA                                                                                                                                            | ✓ hypocaloric diet(500 – kcal/d deficit from weight maintaining caloric intake)                                                                                                                                                                                                                                                                            |
|                   |                      |      |           | TZD                   | 30 mg/d (titrated after 2 months to 45 mg/d)                                                                                                                                           | 50 | 36             | 52±10         | 6.94±1.51    |                                               |                                                                                                                                               |                                                                                                                                                                                                                                                                                                                                                            |
| Feng-2017         | NCT03068065          | 24W  | China     | GLP-1                 | first week:0.6 mg/day<br>second week:1.2 mg/day<br>third week:1.8mg/day                                                                                                                | 29 | 21             | 46.79 ± 1.80  | 8.8±2.4      | ✓                                             | NA                                                                                                                                            | ✓ proper diet and exercise                                                                                                                                                                                                                                                                                                                                 |
|                   |                      |      |           | Metformin             | 30 mg                                                                                                                                                                                  | 29 | 20             | 48.07 ± 2.34  | 9±1.6        |                                               |                                                                                                                                               |                                                                                                                                                                                                                                                                                                                                                            |
| Guo-2020          | no. ChiCTR2000035091 | 26W  | China     | GLP-1                 | first week:250 mg thrice daily<br>second week:500 mg thrice daily<br>third week:1000 mg twice daily<br>starting dose of 0.6 mg 1/ day<br>increased by weekly forced titration to 1.8mg | 31 | 18             | 52.0 ± 8.7    | 7.1±1.2      | ✓                                             | Metformin at a constant dose.                                                                                                                 | ✓ exercise, weight loss and diet adjustment.                                                                                                                                                                                                                                                                                                               |
|                   |                      |      |           | Placebo               | /                                                                                                                                                                                      | 30 | 16             | 53.1 ± 6.3    | 7.3±1.6      |                                               |                                                                                                                                               |                                                                                                                                                                                                                                                                                                                                                            |
| HAUKELAND-2009    | NCT00303537          | 24W  | Norway    | Placebo               | /                                                                                                                                                                                      | 24 | 16             | 49.9 ± 12.8   | 5.7±1        | ✓                                             | NA                                                                                                                                            | ✓ physical activity at least 30 min daily and a diet low in fat, particularly saturated fat, and refined carbohydrates.                                                                                                                                                                                                                                    |
|                   |                      |      |           | Metformin             | started with 500 mg increased every week until a maximal daily dose of 2500 mg or 3000 mg                                                                                              | 20 | 16             | 44.3 ± 9.0    | 5.5±0.8      |                                               |                                                                                                                                               |                                                                                                                                                                                                                                                                                                                                                            |
| Ito-2017          | UMIN00022651         | 24W  | Japan     | TZD                   | 15–30 mg                                                                                                                                                                               | 34 | 18             | 59.1 ± 9.8    | 9.41±2.82    | ✓                                             | Medications:<br>Metformin;DPP-4 inhibitor;<br>Sulfonylurea;Insulin;<br>ARB or ACE inhibitor;<br>Statin                                        | ✓ received diet and exercise counseling                                                                                                                                                                                                                                                                                                                    |
|                   |                      |      |           | SGLT2                 | 50 mg                                                                                                                                                                                  | 32 | 14             | 57.3 ± 12.1   | 8.89±2.15    |                                               |                                                                                                                                               |                                                                                                                                                                                                                                                                                                                                                            |
| Joy-2017          | NCT01260246          | 24W  | UK        | placebo               | /                                                                                                                                                                                      | 6  | 2              | 54.7 ± 9.8    | NA           | ✓                                             |                                                                                                                                               | NA                                                                                                                                                                                                                                                                                                                                                         |
|                   |                      |      |           | DPP-4                 | 100 mg daily                                                                                                                                                                           | 6  | 3              | 56.7 ± 9.9    | NA           |                                               |                                                                                                                                               |                                                                                                                                                                                                                                                                                                                                                            |
| Kinoshita-2020    | UMIN 000021291       | 28W  | Japan     | TZD                   | 7.5–15 mg/day                                                                                                                                                                          | 33 | 15             | 59±1.9        | 7.61±0.22    | ✓                                             | Medications:<br>Glinide;DPP-4 inhibitor;<br>Metformin;GLP-1 RA;<br>α-GI; Ursodeoxycholic acid;<br>ARB or ACE inhibitor;<br>Statin;Fibrate;EPA | NA                                                                                                                                                                                                                                                                                                                                                         |
|                   |                      |      |           | Sus                   | 0.5–1 mg/day                                                                                                                                                                           | 33 | 15             | 58.0±2.3      | 8.22±0.34    |                                               |                                                                                                                                               |                                                                                                                                                                                                                                                                                                                                                            |
|                   |                      |      |           | SGLT-2                | 5 mg/day                                                                                                                                                                               | 32 | 15             | 58.7±1.6      | 8.06±0.38    |                                               |                                                                                                                                               |                                                                                                                                                                                                                                                                                                                                                            |
| Kuchay-2018       | NA                   | 20W  | India     | standard treatment    | /                                                                                                                                                                                      | 20 | NA             | NA            | 9.78±3.17    | ✓                                             | NA                                                                                                                                            | NA                                                                                                                                                                                                                                                                                                                                                         |
|                   |                      |      |           | SGLT-2                | 10 mg/d                                                                                                                                                                                | 22 | NA             | NA            | 9.61±2.44    |                                               |                                                                                                                                               |                                                                                                                                                                                                                                                                                                                                                            |
| Nadeau-2009       | NA                   | 24W  | USA       | Placebo               | /                                                                                                                                                                                      | 13 | 5              | NA            | 4.93±0.14    | ×                                             | NA                                                                                                                                            | NA                                                                                                                                                                                                                                                                                                                                                         |
|                   |                      |      |           | Metformin             | tartedinitially 500 mg once daily increased to 500 mg twice daily at 1 month then to 850 mg twice daily at 2 months                                                                    | 37 | 12             | NA            | 5.06±0.12    |                                               |                                                                                                                                               |                                                                                                                                                                                                                                                                                                                                                            |
| Omer-2010         | NA                   | 48W  | Turkey    | Metformin             | 1700 mg/d                                                                                                                                                                              | 22 | 15             | 48.0 ± 9.8    | 6.59±1.28    | ✓                                             | NA                                                                                                                                            | ✓ exercise, dietary counseling                                                                                                                                                                                                                                                                                                                             |
|                   |                      |      |           | SGLT2                 | 4 mg/d                                                                                                                                                                                 | 20 | 9              | 49.3 ± 6      | 7.02±1.44    |                                               |                                                                                                                                               |                                                                                                                                                                                                                                                                                                                                                            |
| Shargorodsky-2012 | NCT01084486          | 48W  | Israel    | Metformin             | 850– 1700 mg/day                                                                                                                                                                       | 32 | 17             | 51.9 ± 10.9   | 7.32±2.85    | NA                                            | Concomitant medication:<br>Antidiabetic treatment ;<br>statins ; ACEIs/ARBs ;<br>Diuretics; B-blockers ;<br>CCB-blockers; Aspirin             | NA                                                                                                                                                                                                                                                                                                                                                         |
|                   |                      |      |           | placebo               | /                                                                                                                                                                                      | 31 | 14             | 55.2 ± 14.0   | 5.46±0.82    |                                               |                                                                                                                                               |                                                                                                                                                                                                                                                                                                                                                            |
| Shibuya-2018      | no. UMIN000016090    | 24W  | Japan     | SGLT2                 | 2.5 mg                                                                                                                                                                                 | 16 | 10             | 53.5± 12.1    | 7.06±0.28    | ✓                                             | NA                                                                                                                                            | × Lifestyle modification was not suggested during the study period                                                                                                                                                                                                                                                                                         |
|                   |                      |      |           | Metformin             | 1500 mg                                                                                                                                                                                | 16 | 8              | 53.6± 10.6    | 8.17±0.49    |                                               |                                                                                                                                               |                                                                                                                                                                                                                                                                                                                                                            |
| Sofer-2011        | NCT01084486          | 16W  | Israel    | Metformin             | 850-1700 mg/d                                                                                                                                                                          | 32 | 17             | 51.9 ± 10.9   | 7.5±2.93     | NA                                            | Concomitant medication:<br>Antidiabetic treatment ;<br>statins ,ACEIs/ARBs ;<br>Diuretics; B-blockers ;<br>CCB-blockers; Aspirin              | NA                                                                                                                                                                                                                                                                                                                                                         |
|                   |                      |      |           | placebo               | /                                                                                                                                                                                      | 31 | 14             | 55.2 ± 14.0   | 5.45±0.88    |                                               |                                                                                                                                               |                                                                                                                                                                                                                                                                                                                                                            |
| Taheri-2020       | IRCT20190122042450N1 | 24W  | Iran      | SGLT2                 | 10 mg/day                                                                                                                                                                              | 43 | 28             | 43.8± 9.7     | 5.22±0.51    | ×                                             | NA                                                                                                                                            | ✓ Participants were encouraged to perform moderate intensity physical activity in the form of 3–6 times the metabolic equivalent task (METs)for more than three times a week, and they were encouraged to follow the recommendation at least 45 min without interruption during the study period. Participants were given standard dietary advice as well. |
|                   |                      |      |           | placebo               | /                                                                                                                                                                                      | 47 | 22             | 44.1± 9.3     | 5.08±0.43    |                                               |                                                                                                                                               |                                                                                                                                                                                                                                                                                                                                                            |
| Tobita-2021       | UMIN000027304        | 12W  | Japan     | SGLT-2                | 5 mg/d                                                                                                                                                                                 | 12 | 8              | 51.6 ± 12.6   | 5.57±0.38    | ×                                             | NA                                                                                                                                            | NA                                                                                                                                                                                                                                                                                                                                                         |
|                   |                      |      |           | DPP-4                 | 20Mg/d                                                                                                                                                                                 | 10 | 7              | 41.8 ± 16.5   | 5.29±0.37    |                                               |                                                                                                                                               |                                                                                                                                                                                                                                                                                                                                                            |
| Yan-2019          | NCT02147925          | 26W  | China     | GLP-1                 | 1.8 mg /d                                                                                                                                                                              | 24 | 17             | 43.1 ± 9.7    | 8.6±2.8      | ✓                                             | metformin                                                                                                                                     | ✓ dietary and exercise                                                                                                                                                                                                                                                                                                                                     |
|                   |                      |      |           | DPP-4                 | 100 mg once daily                                                                                                                                                                      | 27 | 21             | 45.7 ± 9.2    | 8.4±2.5      |                                               |                                                                                                                                               |                                                                                                                                                                                                                                                                                                                                                            |
| Yoneda-2020       | NA                   | 24W  | Japan     | TZD                   | 15-30 mg                                                                                                                                                                               | 19 | 8              | 58.8±8.1      | 8.01±2.28    | ✓                                             | Medication of diabetes (Metformin;DPP-4; Sulfonylurea;Alpha- G)                                                                               | NA                                                                                                                                                                                                                                                                                                                                                         |
|                   |                      |      |           | SGLT-2                | 20 mg                                                                                                                                                                                  | 21 | 13             | 58.4±12.2     | 8.03±2.79    |                                               |                                                                                                                                               |                                                                                                                                                                                                                                                                                                                                                            |
| Zhang-2020        | NA                   | 24W  | China     | GLP-1                 | first week:0.6 mg/day<br>second week:1.2mg/day                                                                                                                                         | 30 | 13             | 50.2 ± 11.5   | 8.9±2.9      | ✓                                             | Metformin 500 mg TID                                                                                                                          | NA                                                                                                                                                                                                                                                                                                                                                         |
|                   |                      |      |           | TZD                   | first week:15 mg/day<br>second week:30 mg/day                                                                                                                                          | 30 | 15             | 51.5 ± 12.1   | 8.7±3.3      |                                               |                                                                                                                                               |                                                                                                                                                                                                                                                                                                                                                            |



### Appendix 3 Risk of bias in included studies

| Study             | Bais                                                     | Evaluation | Evidence                                                                                                                                                                                    |
|-------------------|----------------------------------------------------------|------------|---------------------------------------------------------------------------------------------------------------------------------------------------------------------------------------------|
| Aithal-2008       | Random sequence generation(selection bias)               | LOW        | Randomization was performed via the arand computer program (Pharmacy department, University Hospitals NHS Trust, Nottingham, UK)                                                            |
|                   | Allocation concealment (selectionbias)                   | UN         | NA                                                                                                                                                                                          |
|                   | Blinding of participants and personnel(performance bias) | LOW        | All clinical and laboratory data were collected in a double-blind manner.                                                                                                                   |
|                   | Blinding of outcome assessment(detection bias)           | LOW        | Liver biopsy specimens were graded and staged according to the NASH histologic scoring                                                                                                      |
|                   | incomplete outcome data (attritionbias)                  | LOW        | 37/37,37/37                                                                                                                                                                                 |
| Anushiravani-2019 | Selective reporting (reporting bias)                     | UN         | NA                                                                                                                                                                                          |
|                   | other bias                                               | High       | Takeda Pharmaceuticals UK provided the pioglitazone and placebo tablets for this                                                                                                            |
|                   | Random sequence generation(selection bias)               | LOW        | These patients were selected randomly using a table of random permutations of 20                                                                                                            |
|                   | Allocation concealment (selectionbias)                   | LOW        | Study pills were allocated in separate packs blinded and labeled using a four-digit code.                                                                                                   |
|                   | Blinding of participants and personnel(performance bias) | LOW        | Apart from the project coordinator, the patients, attending physicians, staff involved in the                                                                                               |
| Aso-2019          | Blinding of outcome assessment(detection bias)           | LOW        | Apart from the project coordinator, the patients, attending physicians, staff involved in the                                                                                               |
|                   | incomplete outcome data (attritionbias)                  | LOW        | 30/30,30/30                                                                                                                                                                                 |
|                   | Selective reporting (reporting bias)                     | LOW        | <a href="https://www.irct.ir/trial/6761">https://www.irct.ir/trial/6761</a>                                                                                                                 |
|                   | other bias                                               | LOW        | There are no conflicts of interest.                                                                                                                                                         |
|                   | Random sequence generation(selection bias)               | UN         | NA                                                                                                                                                                                          |
| Balas-2007        | Allocation concealment (selectionbias)                   | High       | open-label                                                                                                                                                                                  |
|                   | Blinding of participants and personnel(performance bias) | High       | open-label                                                                                                                                                                                  |
|                   | Blinding of outcome assessment(detection bias)           | LOW        | objective indicator                                                                                                                                                                         |
|                   | incomplete outcome data (attritionbias)                  | LOW        | 33/33,24/24                                                                                                                                                                                 |
|                   | Selective reporting (reporting bias)                     | LOW        | <a href="https://upload.umin.ac.jp/cgi-open-bin/ctr_e/ctr_view.cgi?recptno=R000025530">https://upload.umin.ac.jp/cgi-open-bin/ctr_e/ctr_view.cgi?recptno=R000025530</a>                     |
| Belfort-2006      | other bias                                               | LOW        | Funding information:Ono Medical Research Foundation                                                                                                                                         |
|                   | Random sequence generation(selection bias)               | LOW        | Randomization was computer-generated by the research pharmacy and blinded to investigators.                                                                                                 |
|                   | Allocation concealment (selectionbias)                   | LOW        | computer-generated by the research pharmacy                                                                                                                                                 |
|                   | Blinding of participants and personnel(performance bias) | UN         | blinded to investigators                                                                                                                                                                    |
|                   | Blinding of outcome assessment(detection bias)           | LOW        | objective indicator                                                                                                                                                                         |
| Bell-2012         | incomplete outcome data (attritionbias)                  | UN         | NA                                                                                                                                                                                          |
|                   | Selective reporting (reporting bias)                     | High       | Takeda Pharma-ceuticals                                                                                                                                                                     |
|                   | other bias                                               | High       | they received partial funding from the manufacturers to carry out their research (Takeda Pharmaceuticals North America).                                                                    |
|                   | Random sequence generation(selection bias)               | LOW        | Randomization was computer-generated by the research pharmacy.                                                                                                                              |
|                   | Allocation concealment (selectionbias)                   | UN         | /                                                                                                                                                                                           |
| Chehrehgosha-2021 | Blinding of participants and personnel(performance bias) | LOW        | The investigators were unaware of the treatment assignments.                                                                                                                                |
|                   | Blinding of outcome assessment(detection bias)           | LOW        | objective indicator                                                                                                                                                                         |
|                   | incomplete outcome data (attritionbias)                  | LOW        | 21/25,26/30                                                                                                                                                                                 |
|                   | Selective reporting (reporting bias)                     | UN         | NA                                                                                                                                                                                          |
|                   | other bias                                               | High       | Takeda Pharma-ceuticals                                                                                                                                                                     |
| Cusi-2016         | Random sequence generation(selection bias)               | UN         | NA                                                                                                                                                                                          |
|                   | Allocation concealment (selectionbias)                   | UN         | NA                                                                                                                                                                                          |
|                   | Blinding of participants and personnel(performance bias) | UN         | NA                                                                                                                                                                                          |
|                   | Blinding of outcome assessment(detection bias)           | LOW        | objective indicator                                                                                                                                                                         |
|                   | incomplete outcome data (attritionbias)                  | LOW        | 74/82,73/84,69/80                                                                                                                                                                           |
| Feng-2017         | Selective reporting (reporting bias)                     | LOW        | <a href="https://pubmed.ncbi.nlm.nih.gov/37373535/">https://pubmed.ncbi.nlm.nih.gov/37373535/</a>                                                                                           |
|                   | other bias                                               | UN         | NA                                                                                                                                                                                          |
|                   | Random sequence generation(selection bias)               | LOW        | computer-generated randomization sequence                                                                                                                                                   |
|                   | Allocation concealment (selectionbias)                   | LOW        | allocation to the treatment arms using a computer-generated randomization sequence.                                                                                                         |
|                   | Blinding of participants and personnel(performance bias) | LOW        | double-blind, placebo-controlled                                                                                                                                                            |
| Guo-2020          | Blinding of outcome assessment(detection bias)           | LOW        | objective indicator                                                                                                                                                                         |
|                   | incomplete outcome data (attritionbias)                  | LOW        | 37/37,35/35,34/34                                                                                                                                                                           |
|                   | Selective reporting (reporting bias)                     | LOW        | <a href="https://www.irct.ir/trial/6761">IRCT   Comparison of the effect of empagliflozin and pioglitazone and placebo on</a>                                                               |
|                   | other bias                                               | LOW        | Abidi Pharmaceuticals supplied empagliflozin, pioglitazone, and placebo and had no other                                                                                                    |
|                   | Random sequence generation(selection bias)               | UN         | NA                                                                                                                                                                                          |
| HAUKELAND-2009    | Allocation concealment (selectionbias)                   | UN         | NA                                                                                                                                                                                          |
|                   | Blinding of participants and personnel(performance bias) | LOW        | Placebo is an oral tablet identical to pioglitazone                                                                                                                                         |
|                   | Blinding of outcome assessment(detection bias)           | LOW        | objective indicator                                                                                                                                                                         |
|                   | incomplete outcome data (attritionbias)                  | LOW        | 51/51,50/50                                                                                                                                                                                 |
|                   | Selective reporting (reporting bias)                     | LOW        | <a href="https://www.ncbi.nlm.nih.gov/pmc/articles/PMC4111111/">University of Texas H.S.C. San Antonio Pioglitazone in Non-Alcoholic Steatohepatitis</a>                                    |
| Ito-2017          | other bias                                               | LOW        | By the Burroughs Wellcome Fund (1006762.01 [Dr. Cusi]) and the American Diabetes                                                                                                            |
|                   | Random sequence generation(selection bias)               | LOW        | Use computergenerated random numbers                                                                                                                                                        |
|                   | Allocation concealment (selectionbias)                   | LOW        | Use computergenerated random numbers                                                                                                                                                        |
|                   | Blinding of participants and personnel(performance bias) | High       | open-label                                                                                                                                                                                  |
|                   | Blinding of outcome assessment(detection bias)           | LOW        | objective indicator                                                                                                                                                                         |
| Joy-2017          | incomplete outcome data (attritionbias)                  | LOW        | 29/29,29/29,29/29                                                                                                                                                                           |
|                   | Selective reporting (reporting bias)                     | LOW        | <a href="https://pubmed.ncbi.nlm.nih.gov/29292929/">Antidiabetic Effects on Intrahepatic Fat - Full Text View - ClinicalTrials.gov</a>                                                      |
|                   | other bias                                               | LOW        | This work was supported by grants from the National Natural Science Foundation of China.                                                                                                    |
|                   | Random sequence generation(selection bias)               | LOW        | Patients were randomized by the trial pharmacist using computer-generated numbers.                                                                                                          |
|                   | Allocation concealment (selectionbias)                   | LOW        | Patients were randomized by the trial pharmacist using computer-generated numbers.                                                                                                          |
| Kinoshita-2020    | Blinding of participants and personnel(performance bias) | High       | This was not a blinded study.                                                                                                                                                               |
|                   | Blinding of outcome assessment(detection bias)           | LOW        | objective indicator                                                                                                                                                                         |
|                   | incomplete outcome data (attritionbias)                  | LOW        | 30/32,31/32,30/32                                                                                                                                                                           |
|                   | Selective reporting (reporting bias)                     | LOW        | <a href="https://www.chictr.org.cn/">中国临床试验注册中心 - 世界卫生组织国际临床试验注册平台一级注册机构 (chictr.org.cn)</a>                                                                                                |
|                   | other bias                                               | LOW        | The project was funded by the Natural Science Foundation of Fujian Province (2017Y0068) and 900 Hospital of the Joint Logistics Team Internal Hospital Project (2019L19).                   |
| Kuchay-2018       | Random sequence generation(selection bias)               | LOW        | Patients included in the study were randomized to treatment with metformin for 6 months                                                                                                     |
|                   | Allocation concealment (selectionbias)                   | LOW        | Patients included in the study were randomized to treatment with metformin for 6 months                                                                                                     |
|                   | Blinding of participants and personnel(performance bias) | LOW        | The allocation code was blinded to patients and investigators until all patients had                                                                                                        |
|                   | Blinding of outcome assessment(detection bias)           | High       | objective indicator                                                                                                                                                                         |
|                   | incomplete outcome data (attritionbias)                  | LOW        | 16/20,24/24                                                                                                                                                                                 |
| Nadeau-2009       | Selective reporting (reporting bias)                     | LOW        | <a href="https://clinicaltrials.gov/ct2/show/NCT00303537?term=NCT00303537&amp;draw=2&amp;rank=1">https://clinicaltrials.gov/ct2/show/NCT00303537?term=NCT00303537&amp;draw=2&amp;rank=1</a> |
|                   | other bias                                               | LOW        | The authors report no conflicts of interest. The authors alone are responsible for the content and                                                                                          |
|                   | Random sequence generation(selection bias)               | LOW        | computer-generated randomization sequence                                                                                                                                                   |
|                   | Allocation concealment (selectionbias)                   | High       | patients were randomly assigned (1:1) using a computer-generated randomization sequence                                                                                                     |
|                   | Blinding of participants and personnel(performance bias) | High       | open-label                                                                                                                                                                                  |
| Omer-2010         | Blinding of outcome assessment(detection bias)           | LOW        | objective indicator                                                                                                                                                                         |
|                   | incomplete outcome data (attritionbias)                  | LOW        | 30/34,31/32                                                                                                                                                                                 |
|                   | Selective reporting (reporting bias)                     | LOW        | <a href="https://upload.umin.ac.jp/cgi-open-bin/ctr_e/ctr_view.cgi?recptno=R000026084">https://upload.umin.ac.jp/cgi-open-bin/ctr_e/ctr_view.cgi?recptno=R000026084</a>                     |
|                   | other bias                                               | LOW        | Sponsor:Ogawa Red Cross Hospital                                                                                                                                                            |
|                   | Random sequence generation(selection bias)               | LOW        | The St. Joseph's Hospital clinical trial pharmacy team randomized patients into                                                                                                             |
| Shargorodsky-2012 | Allocation concealment (selectionbias)                   | LOW        | The St. Joseph's Hospital clinical trial pharmacy team randomized patients into                                                                                                             |
|                   | Blinding of participants and personnel(performance bias) | LOW        | Blinding and allocation concealment was maintained by use of identicallooking bottles and                                                                                                   |
|                   | Blinding of outcome assessment(detection bias)           | LOW        | objective indicator                                                                                                                                                                         |
|                   | incomplete outcome data (attritionbias)                  | LOW        | 5/6,5/6                                                                                                                                                                                     |
|                   | Selective reporting (reporting bias)                     | LOW        | <a href="https://clinicaltrials.gov/ct2/show/NCT01260246?term=NCT01260246&amp;draw=2&amp;rank=1">https://clinicaltrials.gov/ct2/show/NCT01260246?term=NCT01260246&amp;draw=2&amp;rank=1</a> |
| Shibuya-2018      | other bias                                               | LOW        | Sponsor:Lawson Health Research Institute                                                                                                                                                    |
|                   | Random sequence generation(selection bias)               | LOW        | A random allocation sequence was generated by a clinical epidemiologist who was not                                                                                                         |
|                   | Allocation concealment (selectionbias)                   | LOW        | aware                                                                                                                                                                                       |
|                   | Blinding of participants and personnel(performance bias) | High       | of this study protocol using a computer software program                                                                                                                                    |
|                   | Blinding of outcome assessment(detection bias)           | LOW        | The enrollment of patients and their assignment into the three groups were carried out by                                                                                                   |
| Sofer-2011        | incomplete outcome data (attritionbias)                  | High       | open-label                                                                                                                                                                                  |
|                   | Selective reporting (reporting bias)                     | LOW        | objective indicator                                                                                                                                                                         |
|                   | other bias                                               | High       | 33/36,33/34,32/40                                                                                                                                                                           |
|                   | Random sequence generation(selection bias)               | LOW        | <a href="https://portal.nih.gov/jp/detail/um?trial_id=UMIN000021291">https://portal.nih.gov/jp/detail/um?trial_id=UMIN000021291</a>                                                         |
|                   | Allocation concealment (selectionbias)                   | LOW        | Research Project Grant 29G-002 from Kawasaki Medical School.                                                                                                                                |
| Taheri-2020       | Blinding of participants and personnel(performance bias) | UN         | NA                                                                                                                                                                                          |
|                   | Blinding of outcome assessment(detection bias)           | UN         | NA                                                                                                                                                                                          |
|                   | incomplete outcome data (attritionbias)                  | High       | open-label                                                                                                                                                                                  |
|                   | Selective reporting (reporting bias)                     | LOW        | objective indicator                                                                                                                                                                         |
|                   | other bias                                               | High       | 22/25(3 discontinued study:1 Balanoposthitis, 1 Non specific fatigue, 1 Significant arthralgia).                                                                                            |
| Tobita-2021       | Random sequence generation(selection bias)               | LOW        | <a href="https://clinicaltrials.gov/ct2/show/NCT02686476?term=NCT02686476&amp;draw=2&amp;rank=1">https://clinicaltrials.gov/ct2/show/NCT02686476?term=NCT02686476&amp;draw=2&amp;rank=1</a> |
|                   | Allocation concealment (selectionbias)                   | LOW        | The current study was supported by an investigator-initiated study grant from the                                                                                                           |
|                   | Blinding of participants and personnel(performance bias) | LOW        | Endocrine                                                                                                                                                                                   |
|                   | Blinding of outcome assessment(detection bias)           | LOW        | and Diabetes Foundation, India (to M.S.K). The funding agency did not play a role in the                                                                                                    |
|                   | incomplete outcome data (attritionbias)                  | LOW        | design and conduct of the study; collection, management, analysis, or interpretation of the                                                                                                 |
| Yan-2019          | Selective reporting (reporting bias)                     | UN         | NA                                                                                                                                                                                          |
|                   | other bias                                               | UN         | NA                                                                                                                                                                                          |
|                   | Random sequence generation(selection bias)               | UN         | Subjects were randomized by a research pharmacist                                                                                                                                           |
|                   | Allocation concealment (selectionbias)                   | LOW        | Subjects were randomized by a research pharmacist                                                                                                                                           |
|                   | Blinding of participants and personnel(performance bias) | LOW        | double-blind                                                                                                                                                                                |
| Yoneda-2020       | Blinding of outcome assessment(detection bias)           | LOW        | objective indicator                                                                                                                                                                         |
|                   | incomplete outcome data (attritionbias)                  | LOW        | 10/13,28/37                                                                                                                                                                                 |
|                   | Selective reporting (reporting bias)                     | UN         | NA                                                                                                                                                                                          |
|                   | other bias                                               | LOW        | This research was supported by grant number M01 RR00069, General Clinical Research                                                                                                          |
|                   | Random sequence generation(selection bias)               | UN         | Centers Program, National Centers for Research Resources, NIH and NIH/NCCR 1K23                                                                                                             |
| Zhang-2020        | Allocation concealment (selectionbias)                   | UN         | RR020038                                                                                                                                                                                    |
|                   | Blinding of participants and personnel(performance bias) | High       | open-label                                                                                                                                                                                  |
|                   | Blinding of outcome assessment(detection bias)           | LOW        | objective indicator                                                                                                                                                                         |
|                   | incomplete outcome data (attritionbias)                  | UN         | NA                                                                                                                                                                                          |
|                   | Selective reporting (reporting bias)                     | UN         | NA                                                                                                                                                                                          |
| Zhang-2020        | other bias                                               | LOW        | Departments of Internal Medicine, Endocrinology, Gastroenterology and Pathology, Ege                                                                                                        |
|                   | Random sequence generation(selection bias)               | UN         | University Medical School, Bornova, Izmir, Turkey                                                                                                                                           |
|                   | Allocation concealment (selectionbias)                   | UN         | NA                                                                                                                                                                                          |
|                   | Blinding of participants and personnel(performance bias) | UN         | NA                                                                                                                                                                                          |
|                   | Blinding of outcome assessment(detection bias)           | UN         | placebo controlled                                                                                                                                                                          |
| Zhang-2020        | incomplete outcome data (attritionbias)                  | LOW        | objective indicator                                                                                                                                                                         |
|                   | Selective reporting (reporting bias)                     | UN         | NA                                                                                                                                                                                          |
|                   | other bias                                               | LOW        | <a href="https://pubmed.ncbi.nlm.nih.gov/37373535/">Effect of Treatment With Insulin Sensitizer on Arterial Properties, Metabolic Parameters and</a>                                        |
|                   | Random sequence generation(selection bias)               | LOW        | <a href="https://pubmed.ncbi.nlm.nih.gov/37373535/">Liver Function in Patients With Nonalcoholic Fatty Liver Disease - Full Text View -</a>                                                 |
|                   | Allocation concealment (selectionbias)                   | LOW        | The corresponding author and all of the authors have no conflicts of interest or financial or                                                                                               |
| Zhang-2020        | Blinding of participants and personnel(performance bias) | LOW        | other contractual agreements that might cause conflicts of interest.                                                                                                                        |
|                   | Blinding of outcome assessment(detection bias)           | LOW        | Participants were randomly assigned by the envelope method                                                                                                                                  |
|                   | incomplete outcome data (attritionbias)                  | High       | Participants were randomly assigned by the envelope method                                                                                                                                  |
|                   | Selective reporting (reporting bias)                     | LOW        | open-label                                                                                                                                                                                  |
|                   | other bias                                               | LOW        | objective indicator                                                                                                                                                                         |
| Zhang-2020        | incomplete outcome data (attritionbias)                  | LOW        | 16/16,16/16                                                                                                                                                                                 |
|                   | Selective reporting (reporting bias)                     | LOW        | <a href="https://pubmed.ncbi.nlm.nih.gov/37373535/">脂肪肝合併2型糖尿病患者におけるルセオグリフロジンの影響に関する無作為化比較試験</a>                                                                                            |
|                   | other bias                                               | LOW        | The authors declare no potential conflict of interest concerning this article.                                                                                                              |
|                   | Random sequence generation(selection bias)               | UN         | NA                                                                                                                                                                                          |
|                   | Allocation concealment (selectionbias)                   | UN         | NA                                                                                                                                                                                          |
| Zhang-2020        | Blinding of participants and personnel(performance bias) | LOW        | matching placebo capsules                                                                                                                                                                   |
|                   | Blinding of outcome assessment(detection bias)           | LOW        | objective indicator                                                                                                                                                                         |
|                   | incomplete outcome data (attritionbias)                  | LOW        | 27/32,25/31                                                                                                                                                                                 |
|                   | Selective reporting (reporting bias)                     | UN         | <a href="https://clinicaltrials.gov/ct2/show/NCT01084486?term=NCT01084486&amp;draw=2&amp;rank=1">https://clinicaltrials.gov/ct2/show/NCT01084486?term=NCT01084486&amp;draw=2&amp;rank=1</a> |
|                   | other bias                                               | UN         | Sponsor:Wolfson Medical Center                                                                                                                                                              |
| Zhang-2020        | Random sequence generation(selection bias)               | UN         | NA                                                                                                                                                                                          |
|                   | Allocation concealment (selectionbias)                   | LOW        | Eligible subjects were randomly assigned in the two study arms using a block randomization                                                                                                  |
|                   | Blinding of participants and personnel(performance bias) | LOW        | method with block size of 4.                                                                                                                                                                |
|                   | Blinding of outcome assessment(detection bias)           | LOW        | Empagliflozin and placebo were quite similar with identical size, shape, color, and packaging.                                                                                              |
|                   | incomplete outcome data (attritionbias)                  | High       | objective indicator                                                                                                                                                                         |
| Zhang-2020        | Selective reporting (reporting bias)                     | LOW        | 43/50,47/50                                                                                                                                                                                 |
|                   | other bias                                               | LOW        | <a href="https://pubmed.ncbi.nlm.nih.gov/37373535/">IRCT   Comparison of the effect of Empagliflozin with Placebo on liver steatosis change in</a>                                          |
|                   | Random sequence generation(selection bias)               | LOW        | <a href="https://pubmed.ncbi.nlm.nih.gov/37373535/">fibrosclan in non diabetic patients with nonalcoholic fatty liver disease</a>                                                           |
|                   | Allocation concealment (selectionbias)                   | LOW        | The role of Abidi Pharmaceuticals was limited to supply of the medicines, empagliflozin and                                                                                                 |
|                   | Blinding of participants and personnel(performance bias) | LOW        | placebo. Data management was performed by the Institute of Endocrinology and                                                                                                                |
| Zhang-2020        | Blinding of outcome assessment(detection bias)           | LOW        | Metabolism monitoring committee that was blinded to the study arms. No funding or                                                                                                           |
|                   | incomplete outcome data (attritionbias)                  | LOW        | sponsorship was received for this study or publication of this article.                                                                                                                     |
|                   | Selective reporting (reporting bias)                     | LOW        | Randomized patients using computer-generated numbers.                                                                                                                                       |
|                   | other bias                                               | LOW        | Randomized patients using computer-generated numbers.                                                                                                                                       |
|                   | Random sequence generation(selection bias)               | LOW        | Blinding and allocation concealment were maintained by use of identical-looking bottles                                                                                                     |
| Zhang-2020        | Allocation concealment (selectionbias)                   | LOW        | and                                                                                                                                                                                         |
|                   | Blinding of participants and personnel(performance bias) | LOW        | objective indicator                                                                                                                                                                         |
|                   | Blinding of outcome assessment(detection bias)           | LOW        | 12/13(Excluded one patientfor ALT<31 u/L),10/13(Excluded 3 patients forPG >200 mg/dl at                                                                                                     |
|                   | incomplete outcome data (attritionbias)                  | LOW        | 120 min in 75 g OGTT)                                                                                                                                                                       |
|                   | Selective reporting (reporting bias)                     | LOW        | <a href="https://pubmed.ncbi.nlm.nih.gov/37373535/">非アルコール性脂肪性肝疾患に対する糖尿病治療薬（SGLT阻害薬・DPP4阻害薬）の効果</a>                                                                                         |
| Zhang-2020        | other bias                                               | LOW        | <a href="https://pubmed.ncbi.nlm.nih.gov/37373535/">に関する検討：無作為化並行群間二重盲検比較試験 関連する治験情報【臨床研究情報ポ</a>                                                                                            |
|                   | Random sequence generation(selection bias)               | LOW        | The authors have no sources of funding, grant support and financial disclosure of this study.                                                                                               |
|                   | Allocation concealment (selectionbias)                   | LOW        | A randomization list was generated using Statistical Analysis System (SAS Institute, Inc., Cary, NC)                                                                                        |
|                   | Blinding of participants and personnel(performance bias) | High       | Patients were allocated using a secure Oracle-based interactive web response system                                                                                                         |
|                   | Blinding of outcome assessment(detection bias)           | High       | ( Jiaying Taimei Medical Technology, Shanghai, China) in accordance with the sequence                                                                                                       |
| Zhang-2020        | incomplete outcome data (attritionbias)                  | High       | from the randomization list.                                                                                                                                                                |
|                   | Selective reporting (reporting bias)                     | LOW        | open-label                                                                                                                                                                                  |
|                   | other bias                                               | LOW        | objective indicator                                                                                                                                                                         |
|                   | Random sequence generation(selection bias)               | High       | 18/24(four lost to follow-up, one for protocol violations, and one for AEs),26/27(one patient                                                                                               |
|                   | Allocation concealment (selectionbias)                   | LOW        | in                                                                                                                                                                                          |
| Zhang-2020        | Blinding of participants and personnel(performance bias) | LOW        | <a href="https://clinicaltrials.gov/ct2/show/NCT02147925?term=NCT02147925&amp;draw=2&amp;rank=1">https://clinicaltrials.gov/ct2/show/NCT02147925?term=NCT02147925&amp;draw=2&amp;rank=1</a> |
|                   | Blinding of outcome assessment(detection bias)           | LOW        | Novo Nordisk neither influenced the content of this publication nor was it involved in the                                                                                                  |
|                   | incomplete outcome data (attritionbias)                  | LOW        | study                                                                                                                                                                                       |
|                   | Selective reporting (reporting bias)                     | LOW        | Randomization was performed using a computer-generated, centrally administered                                                                                                              |
|                   | other bias                                               | High       | procedure                                                                                                                                                                                   |
| Zhang-2020        | Allocation concealment (selectionbias)                   | LOW        | Patients were allocated to each treatment group through the central registration system                                                                                                     |
|                   | Blinding of participants and personnel(performance bias) | High       | open-label                                                                                                                                                                                  |
|                   | Blinding of outcome assessment(detection bias)           | LOW        | objective indicator                                                                                                                                                                         |
|                   | incomplete outcome data (attritionbias)                  | LOW        | 17/19(2 discontinued the treatment :1 due to adverse event (severe edema),1 due to                                                                                                          |
|                   | Selective reporting (reporting bias)                     | LOW        | idental                                                                                                                                                                                     |
| Zhang-2020        | other bias                                               | LOW        | <a href="https://pubmed.ncbi.nlm.nih.gov/37373535/">糖尿病を合併した非アルコール性脂肪性肝疾患（NAFLD）患者におけるトホグリフロジ</a>                                                                                           |
|                   | Random sequence generation(selection bias)               | LOW        | <a href="https://pubmed.ncbi.nlm.nih.gov/37373535/">ンの肝脂肪化改善効果をピオグリタゾンと比較する非盲検ランダム化探索的試験 関連</a>                                                                                             |
|                   | Allocation concealment (selectionbias)                   | UN         | <a href="https://pubmed.ncbi.nlm.nih.gov/37373535/">する治験情報【臨床研究情報ポータルサイト】 (niph.go.jp)</a>                                                                                                  |
|                   | Blinding of participants and personnel(performance bias) | UN         | The present clinical trial was conducted at the Yokohama City University (as the sponsor)                                                                                                   |
|                   | Blinding of outcome assessment(detection bias)           | UN         | and                                                                                                                                                                                         |
| Zhang-2020        | incomplete outcome data (attritionbias)                  | LOW        | computer-generated sequence                                                                                                                                                                 |
|                   | Selective reporting (reporting bias)                     | UN         | NA                                                                                                                                                                                          |
|                   | other bias                                               | High       | open-label                                                                                                                                                                                  |
|                   | Random sequence generation(selection bias)               | LOW        | objective indicator                                                                                                                                                                         |
|                   | Allocation concealment (selectionbias)                   | UN         | NA                                                                                                                                                                                          |
| Zhang-2020        | Blinding of participants and personnel(performance bias) | UN         | NA                                                                                                                                                                                          |
|                   | Blinding of outcome assessment(detection bias)           | UN         | NA                                                                                                                                                                                          |
|                   | incomplete outcome data (attritionbias)                  | UN         | NA                                                                                                                                                                                          |
|                   | Selective reporting (reporting bias)                     | UN         | NA                                                                                                                                                                                          |
|                   | other bias                                               | LOW        | This work was supported by the Yantai Affiliated Hospital of Binzhou Medical University                                                                                                     |

## Appendix 4 Network plots for each outcome

Fig.s1 Network plot for HOMA-IR

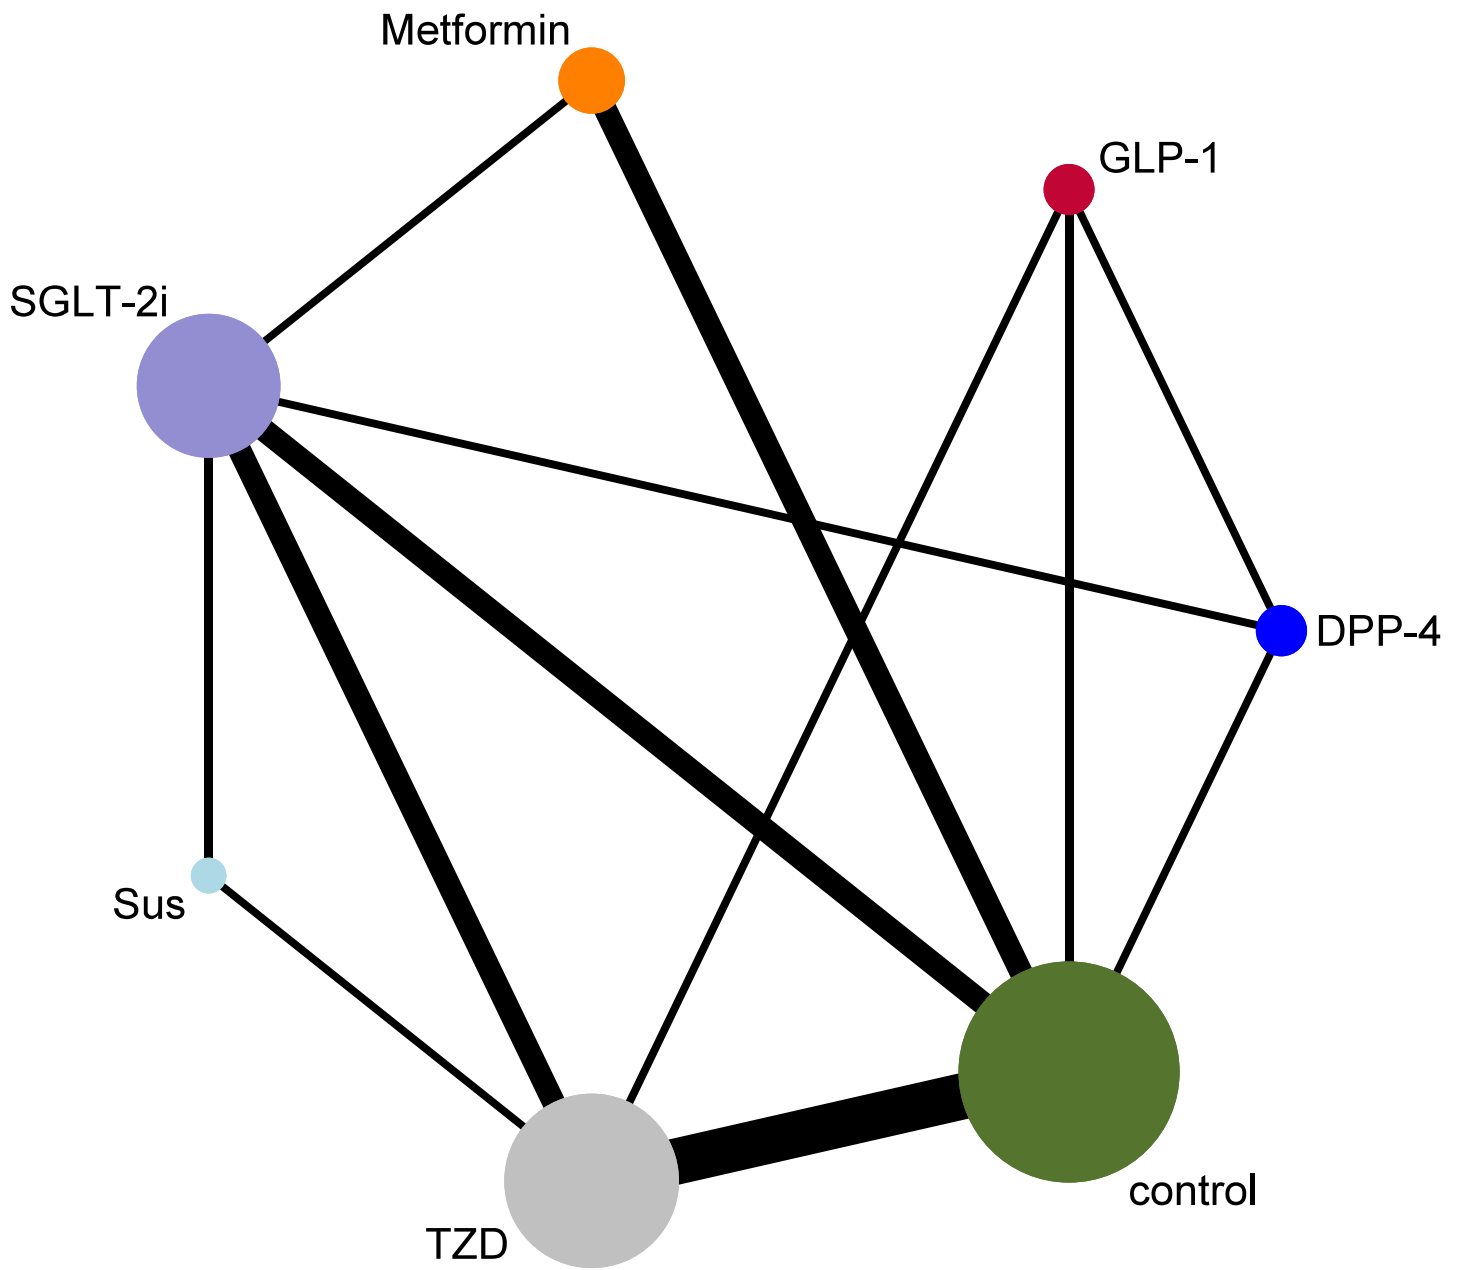



Fig.s2 Network plot for VAT

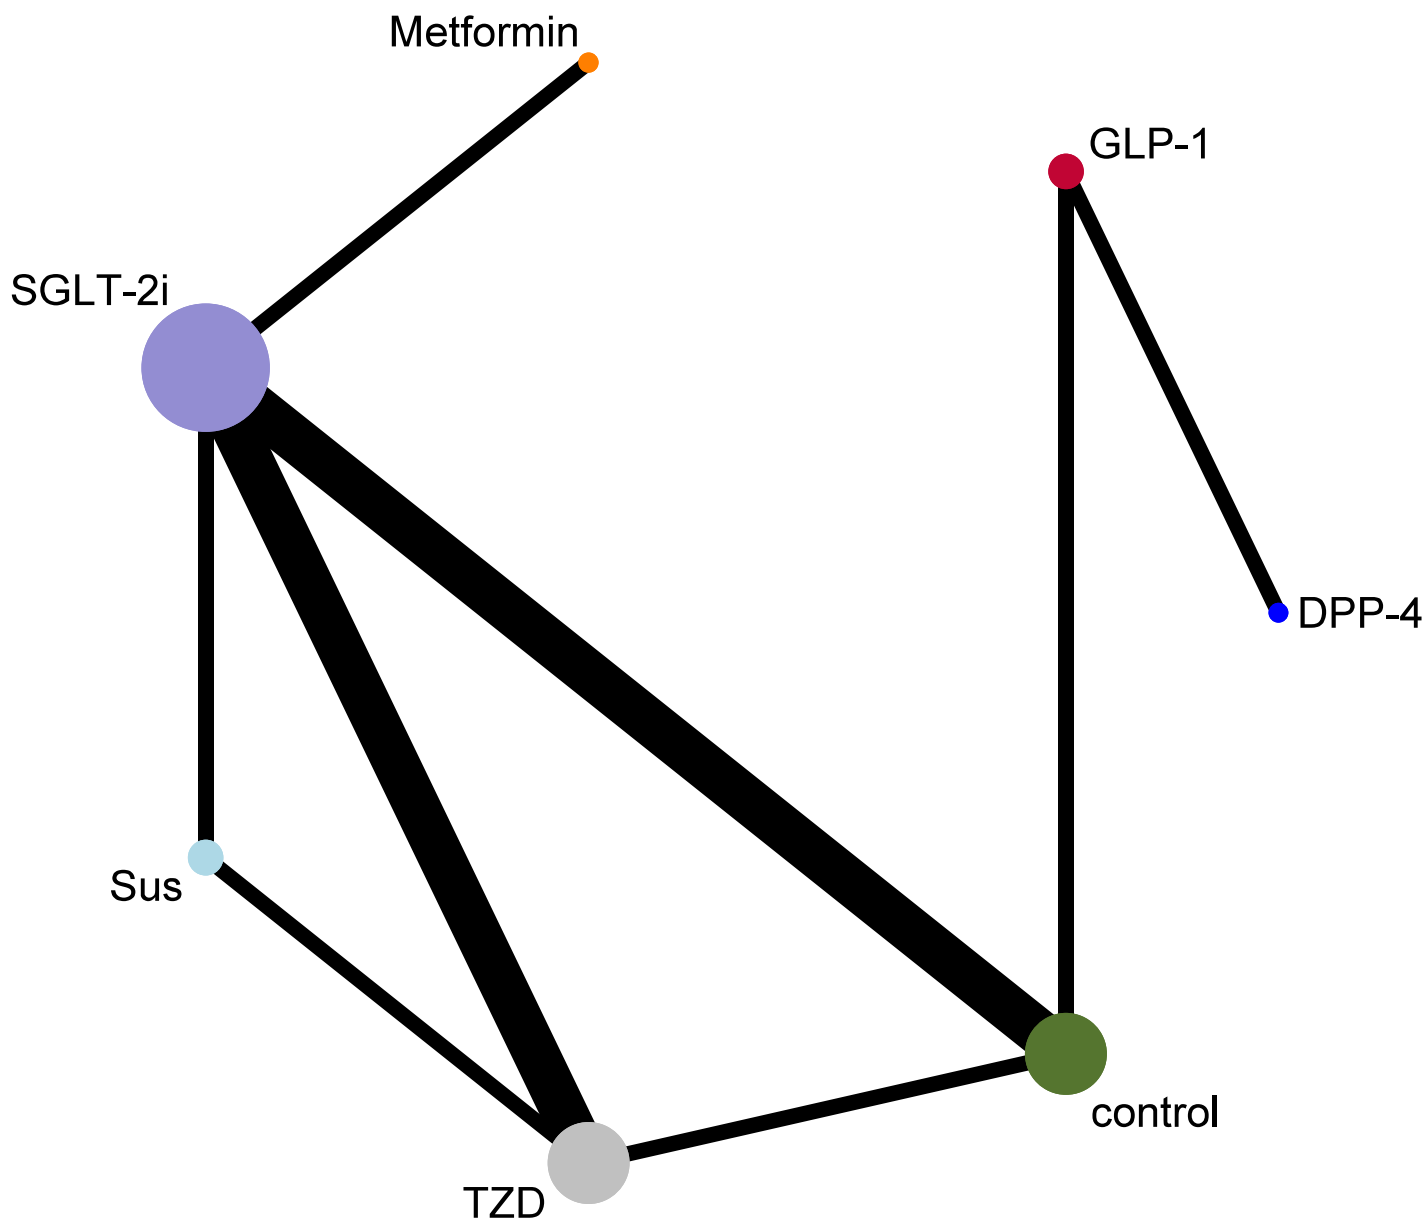

Fig.s3 Network plot for SAT

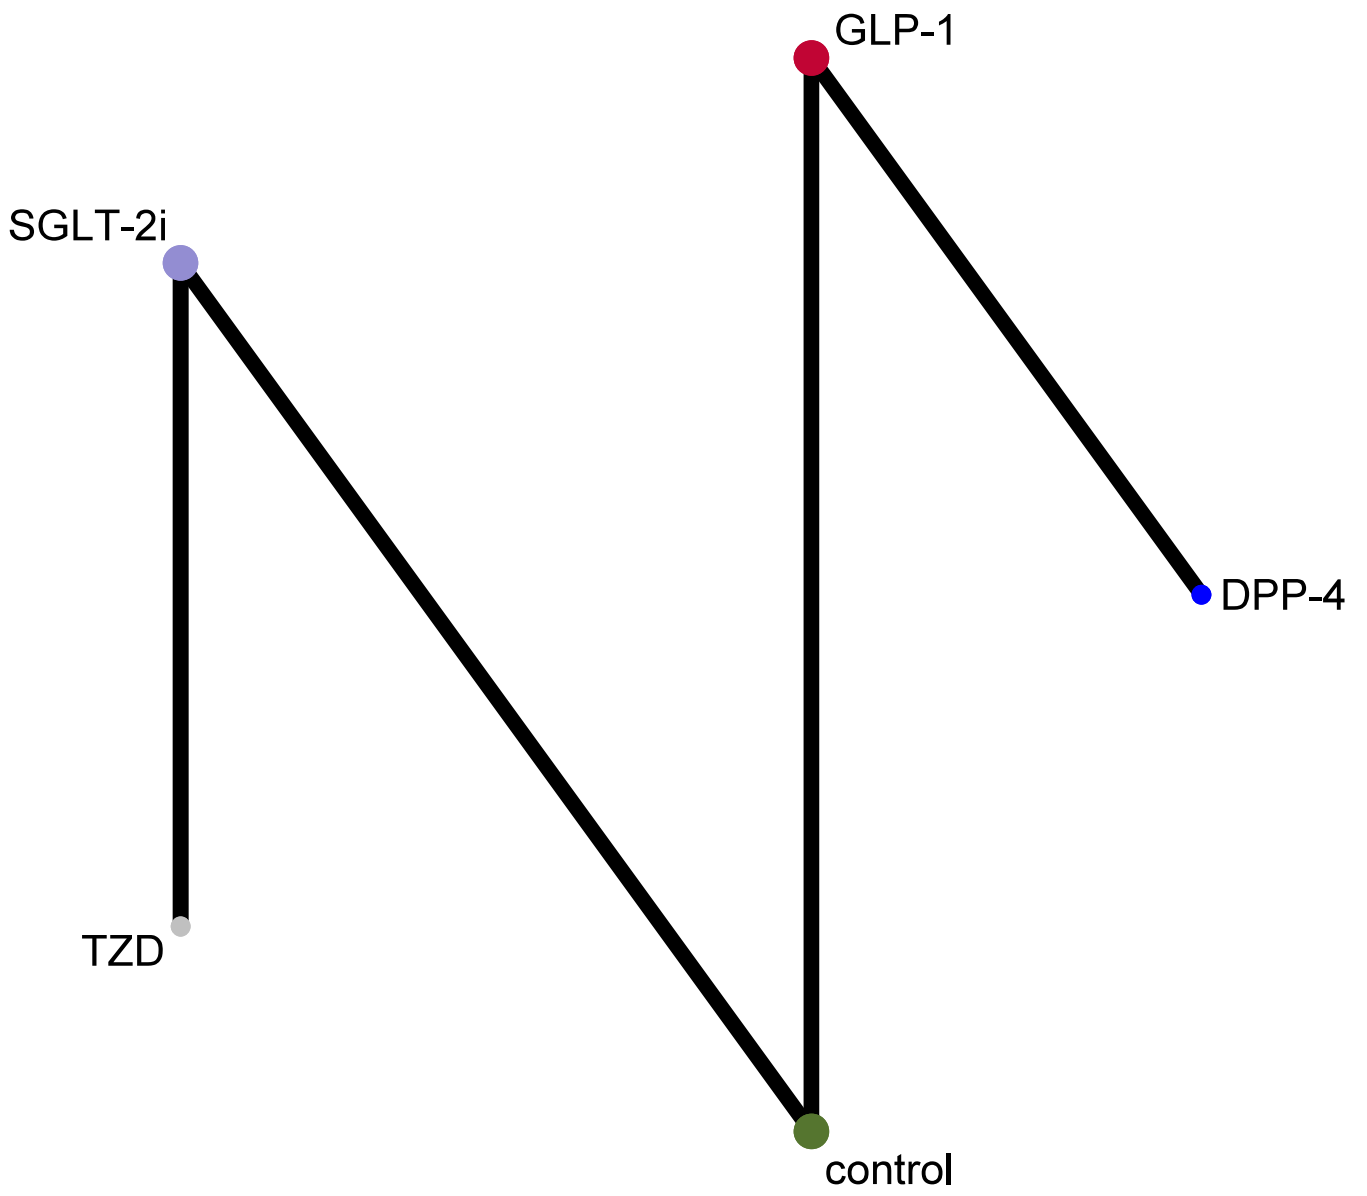

Fig.s4 Network plot for BMI

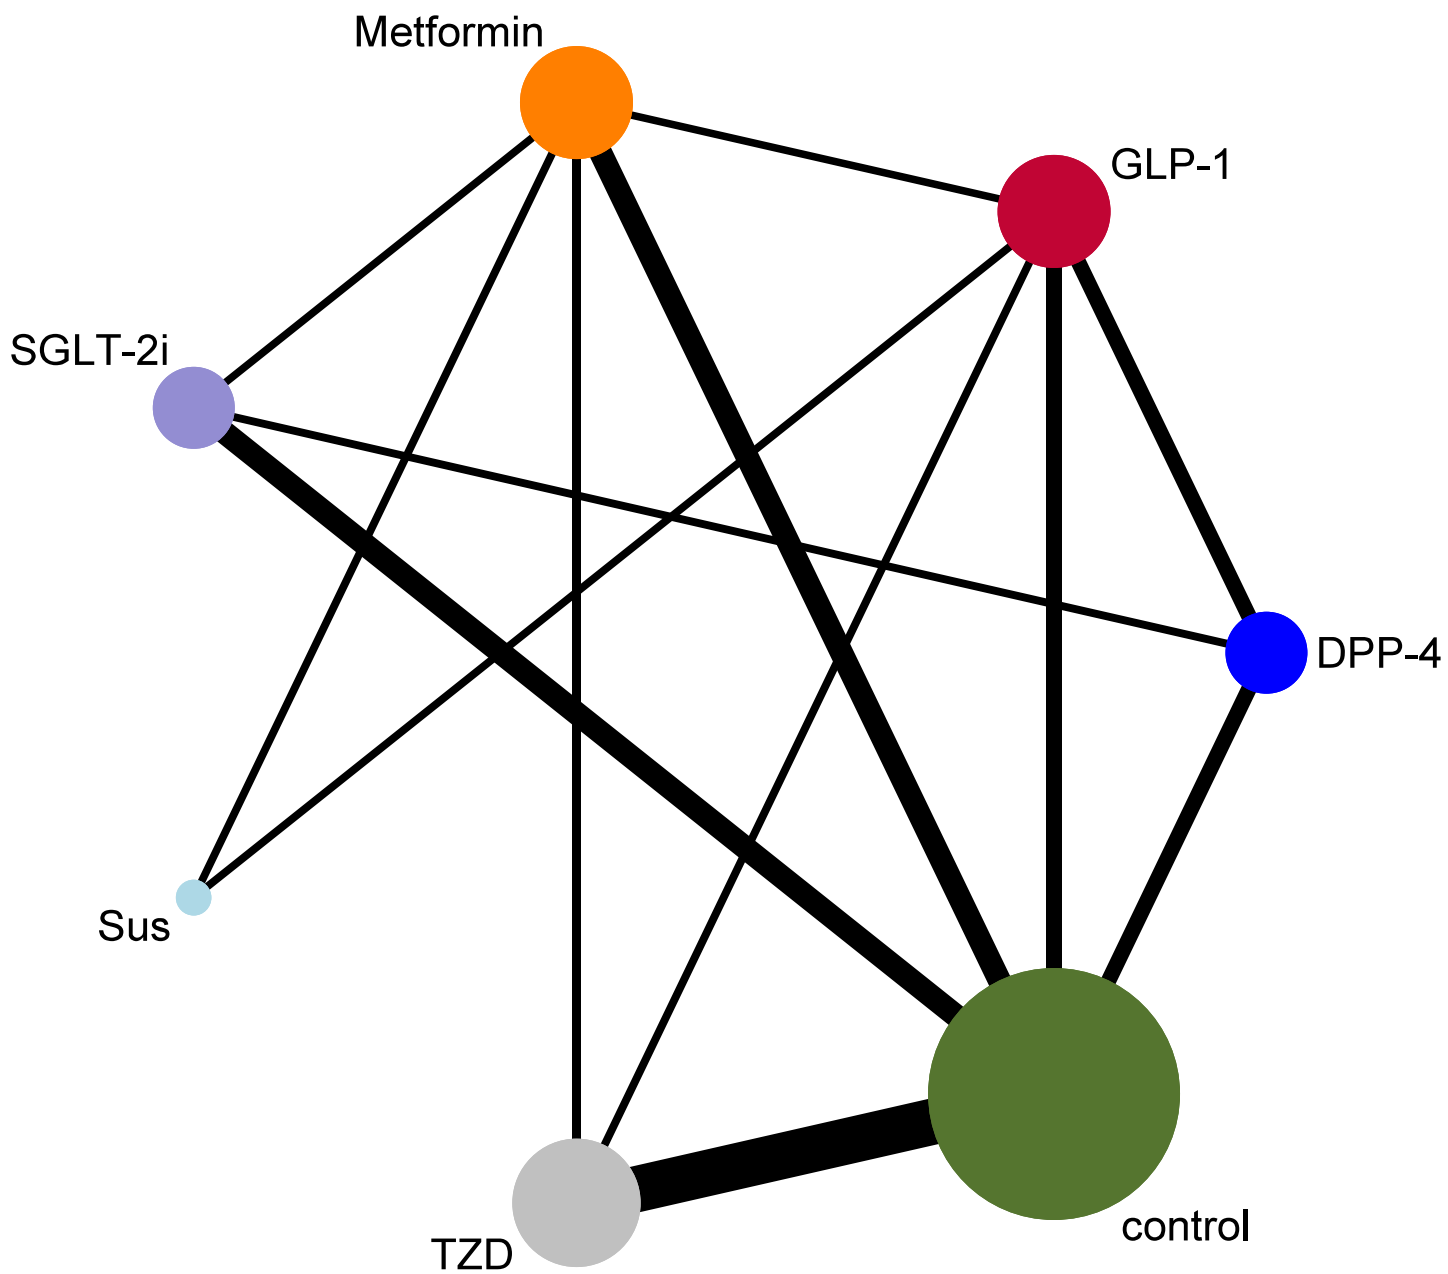

Fig.s5 Network plot for Weight

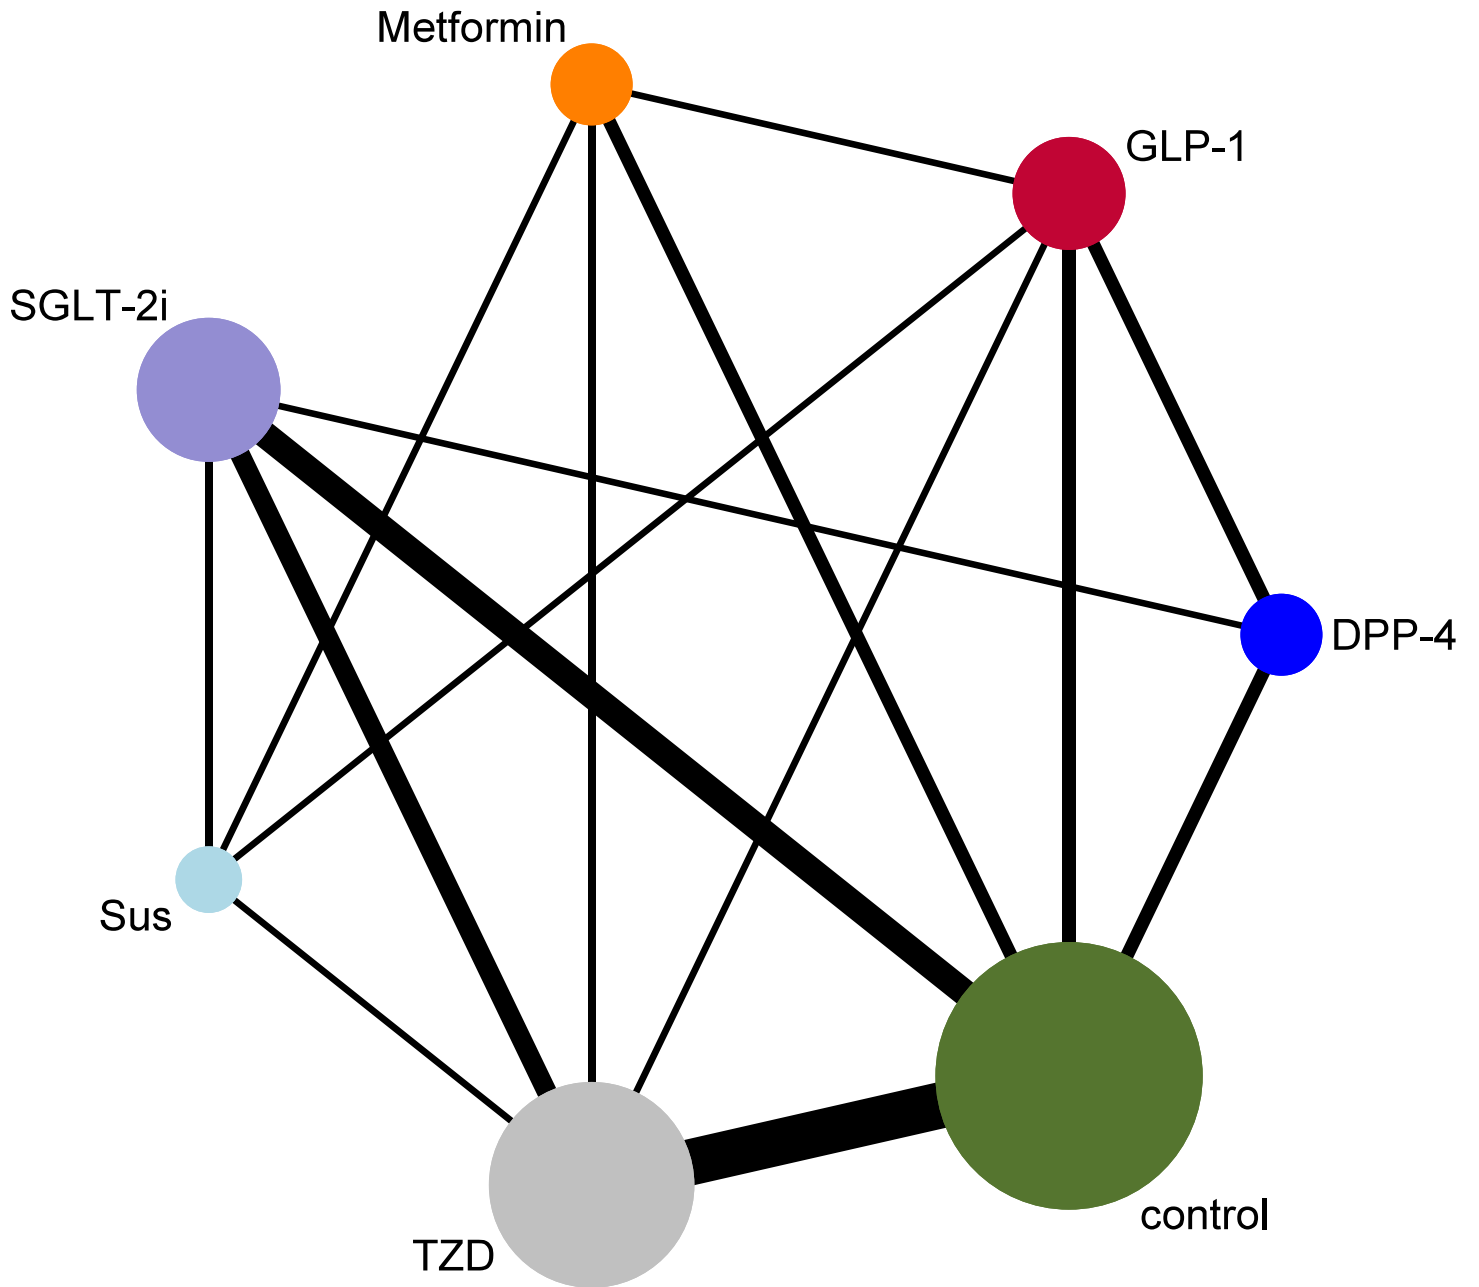

Fig.s6 Network plot for Leptin

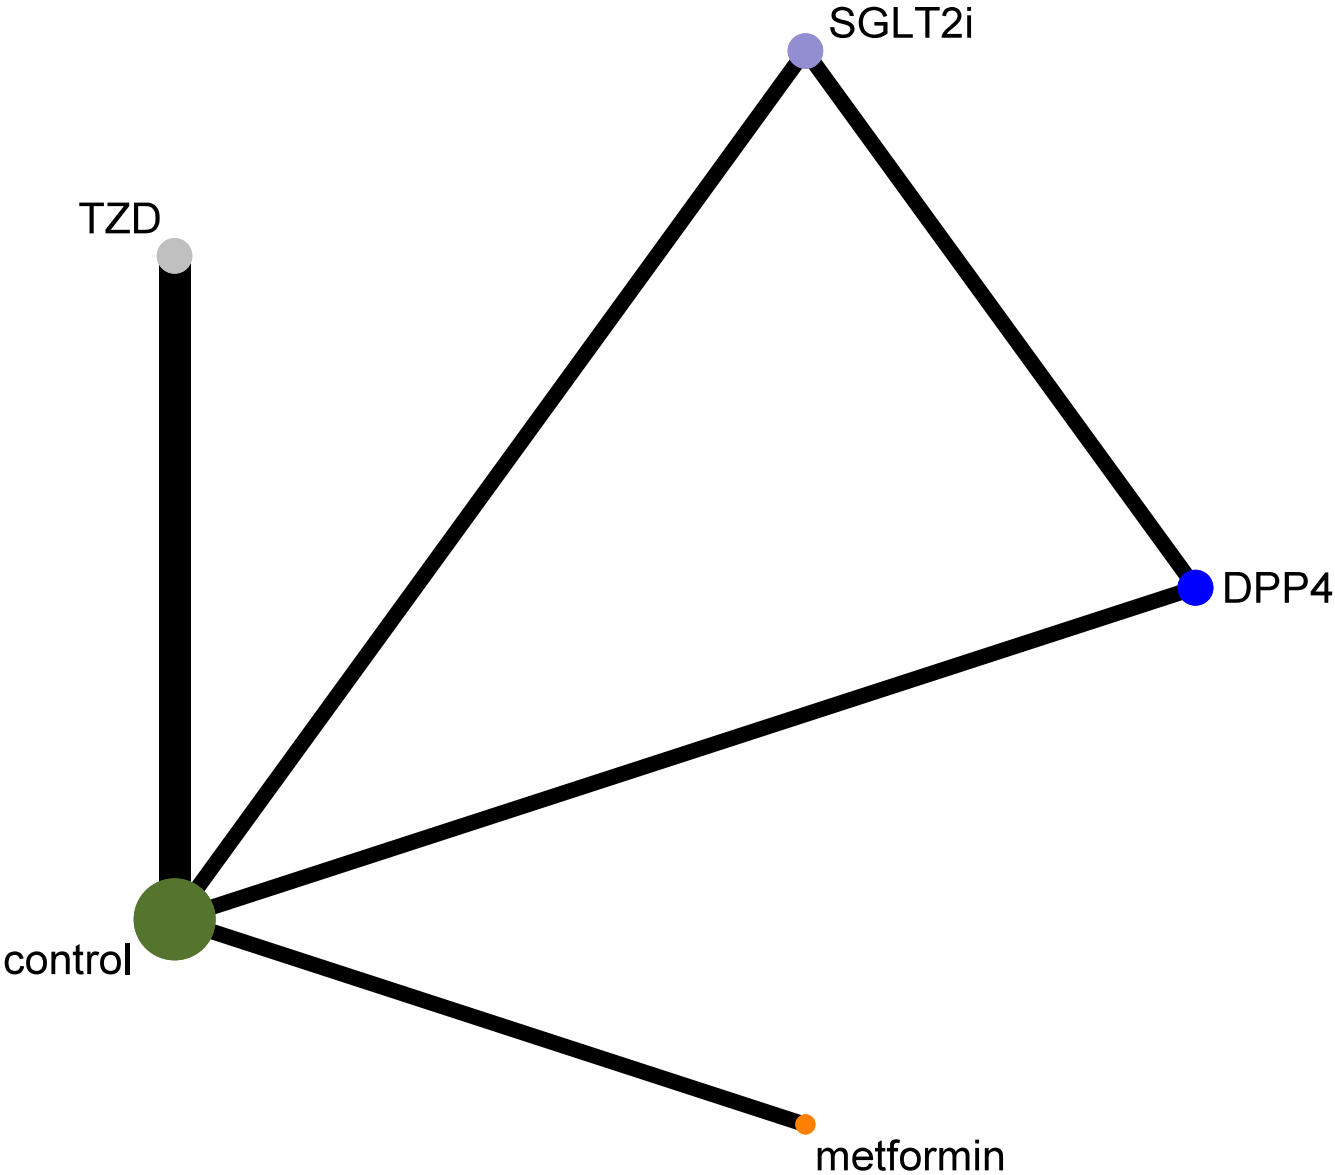



Fig.s7 Network plot for Adionectin

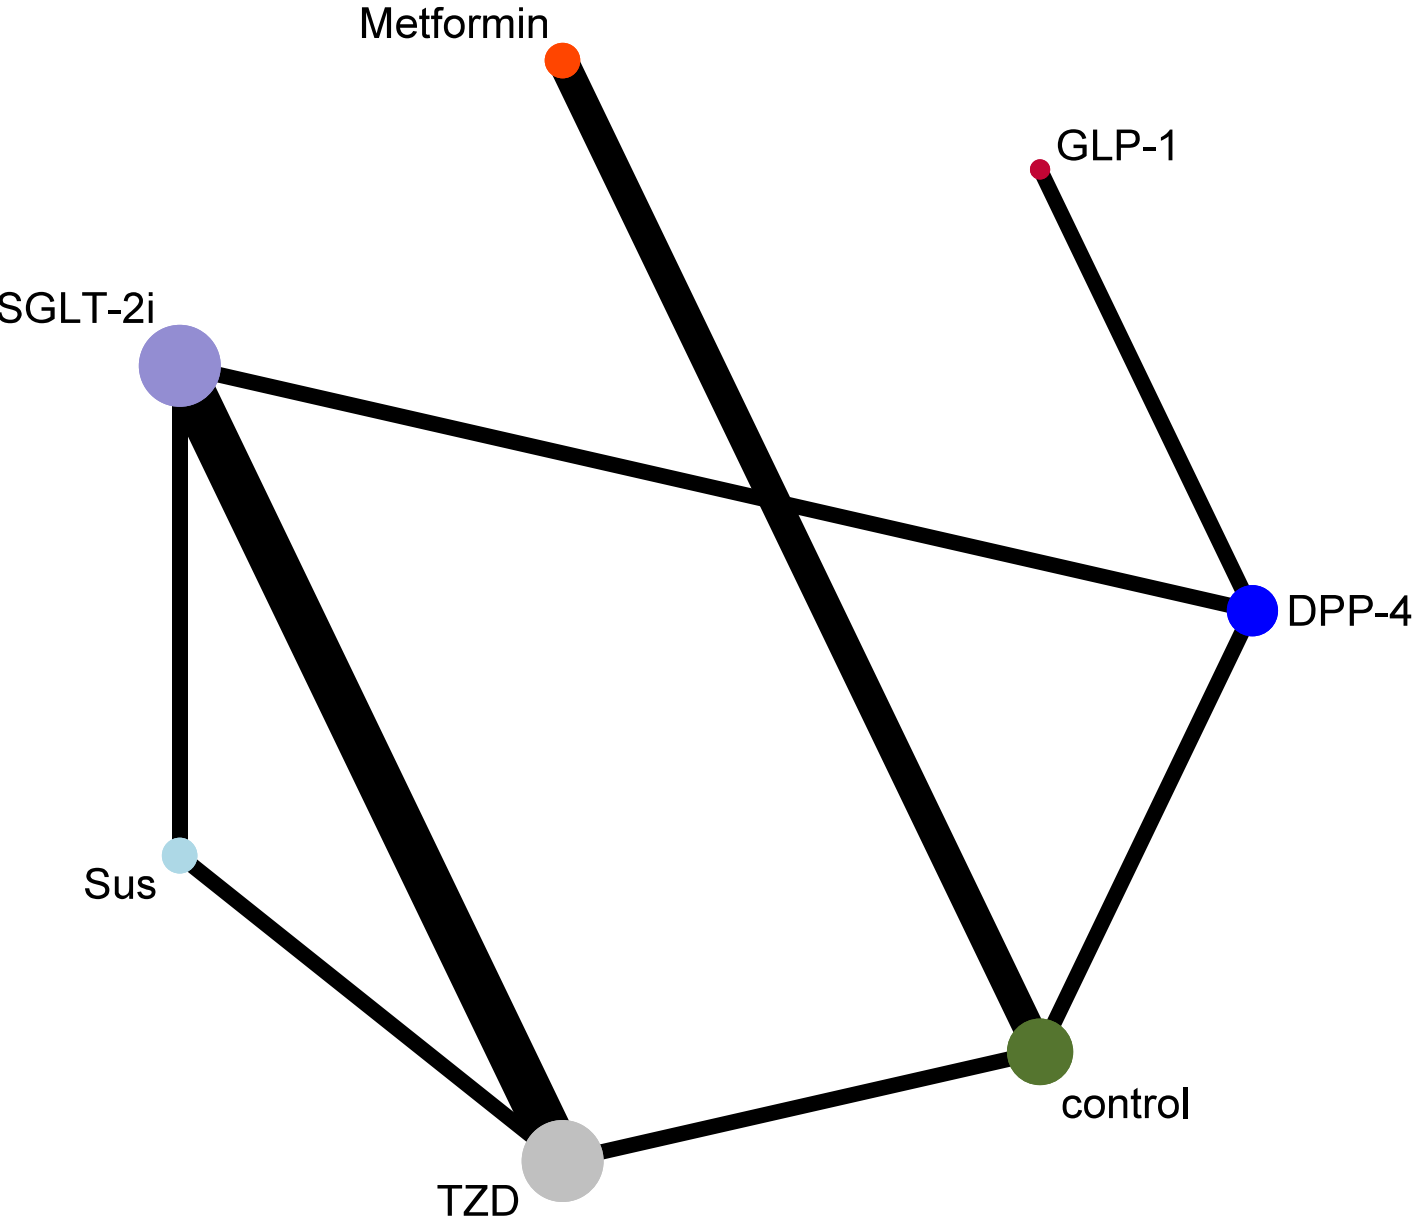

Fig.s8 Network plot for FBS

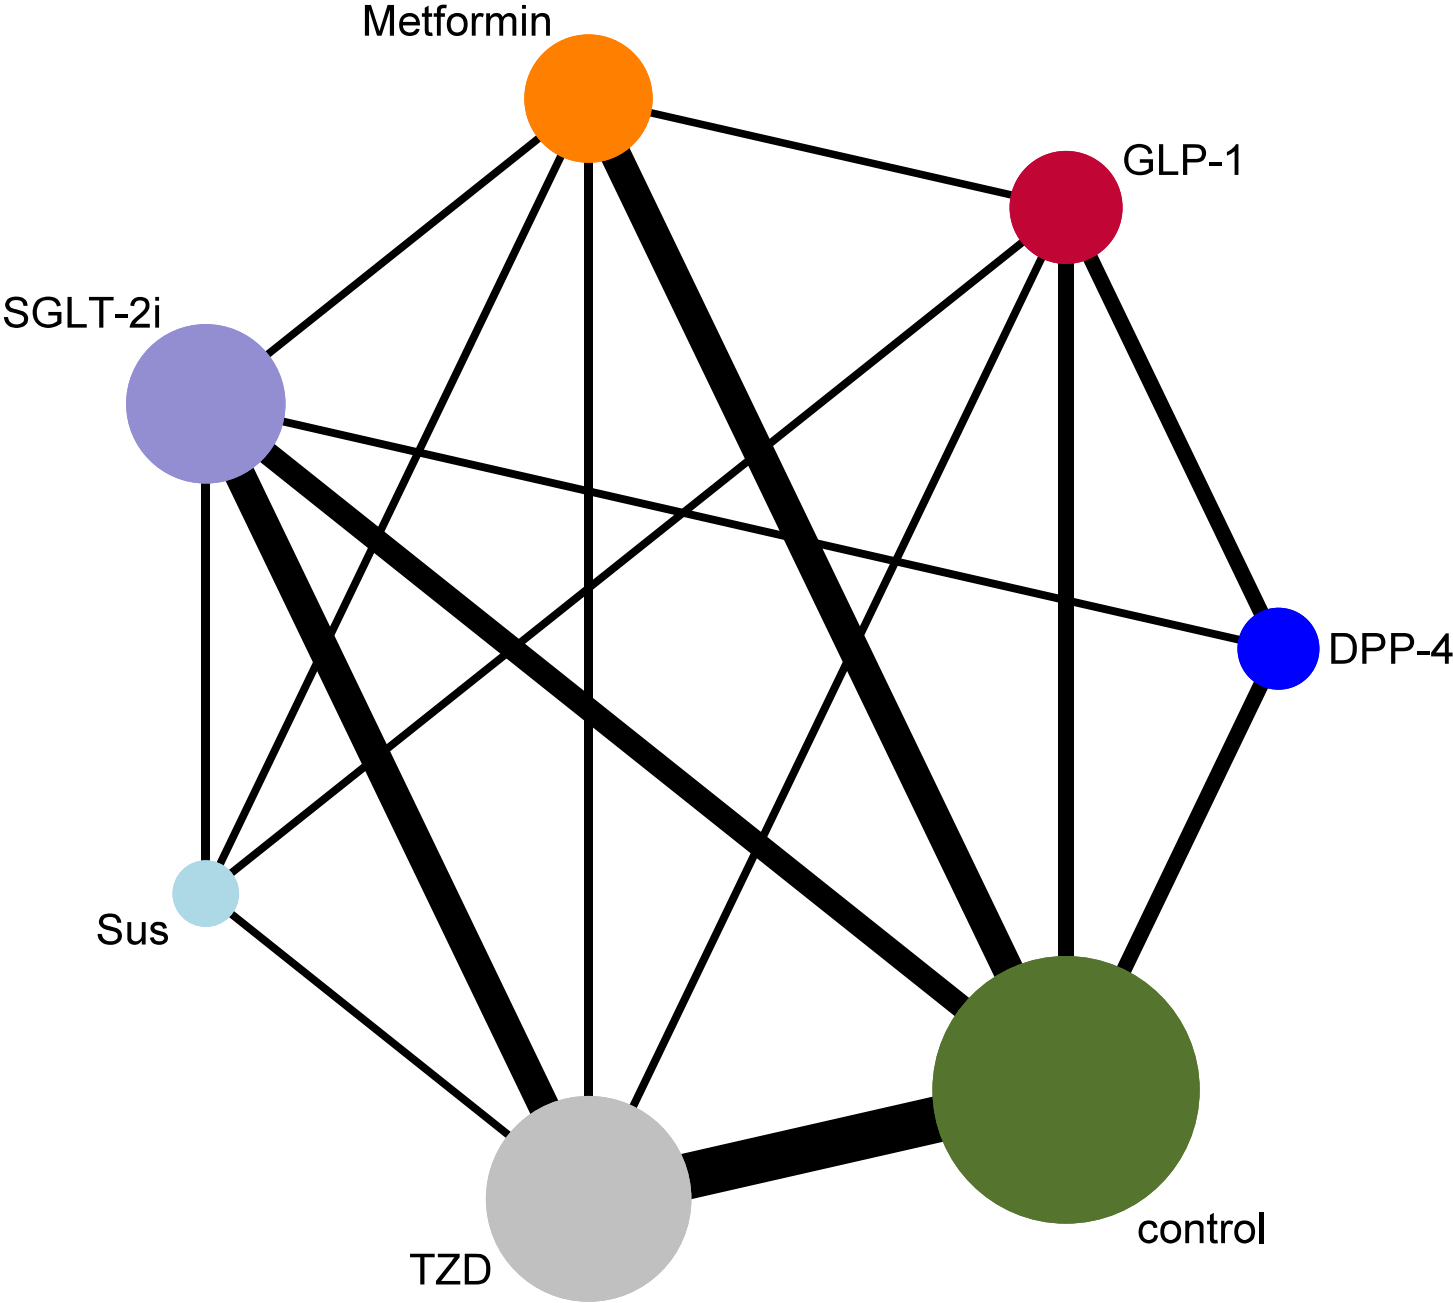

Fig.s9 Network plot for TG

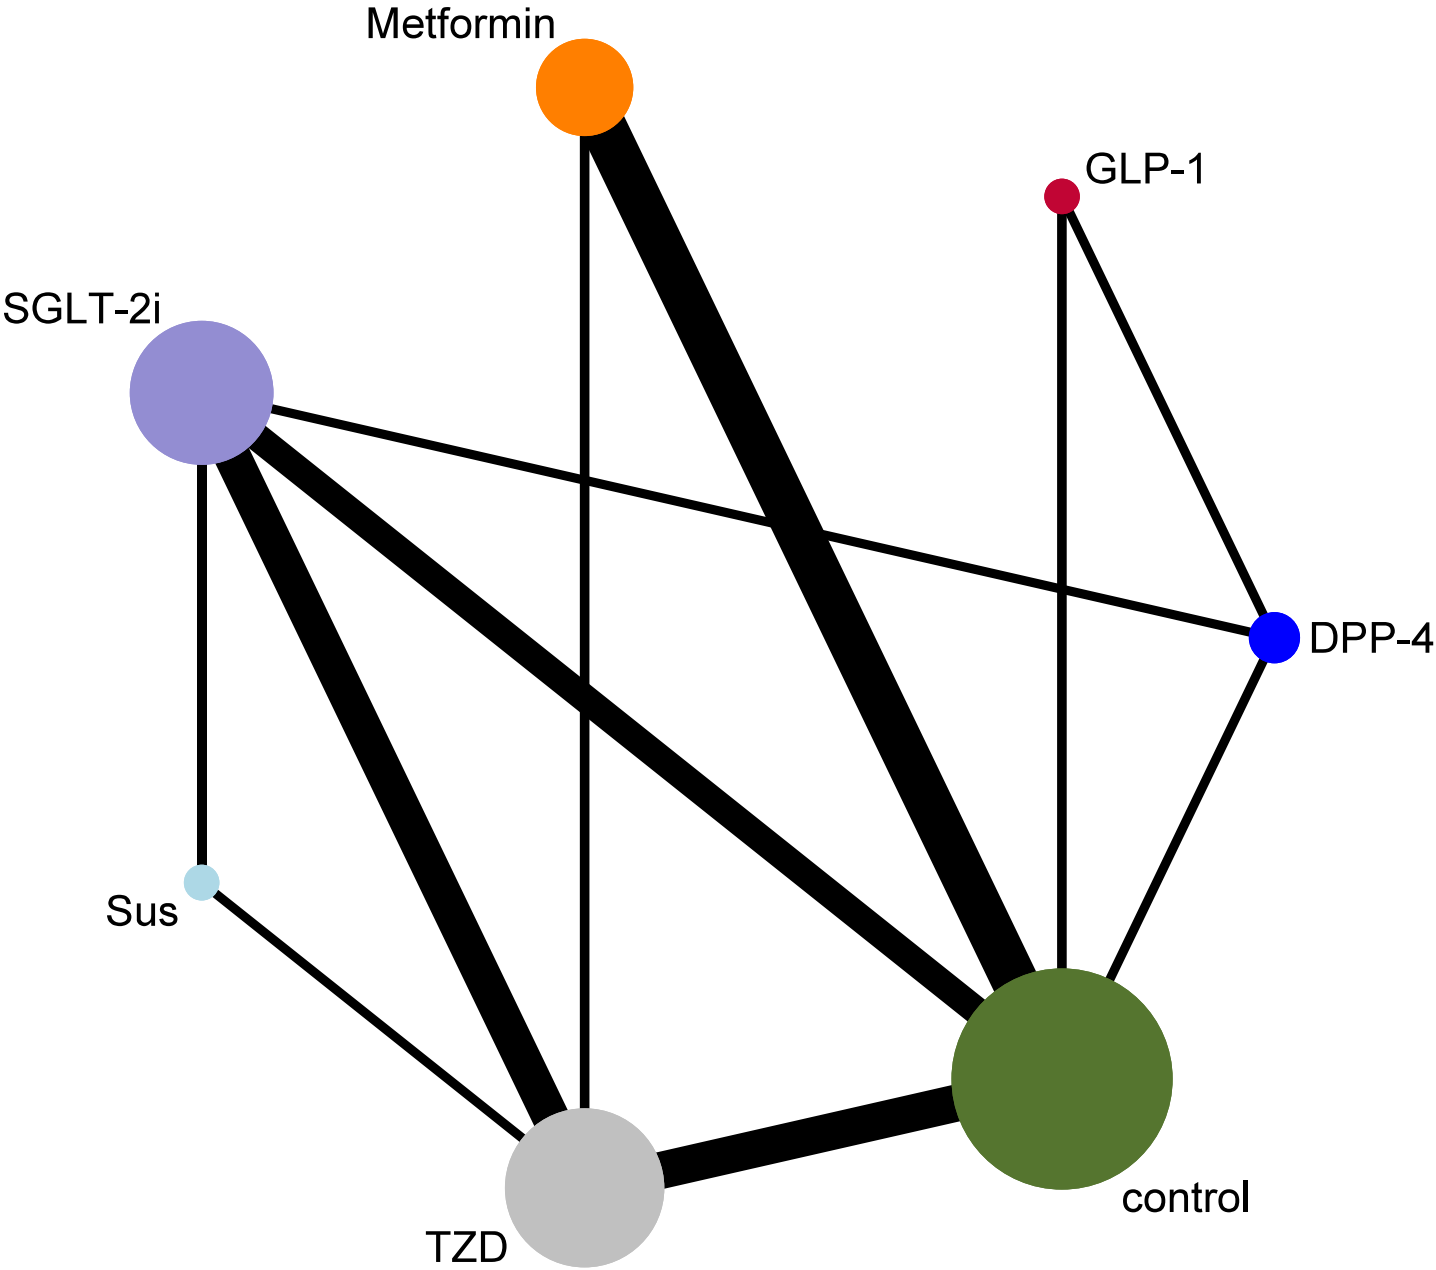

Fig.s10 Network plot for TC

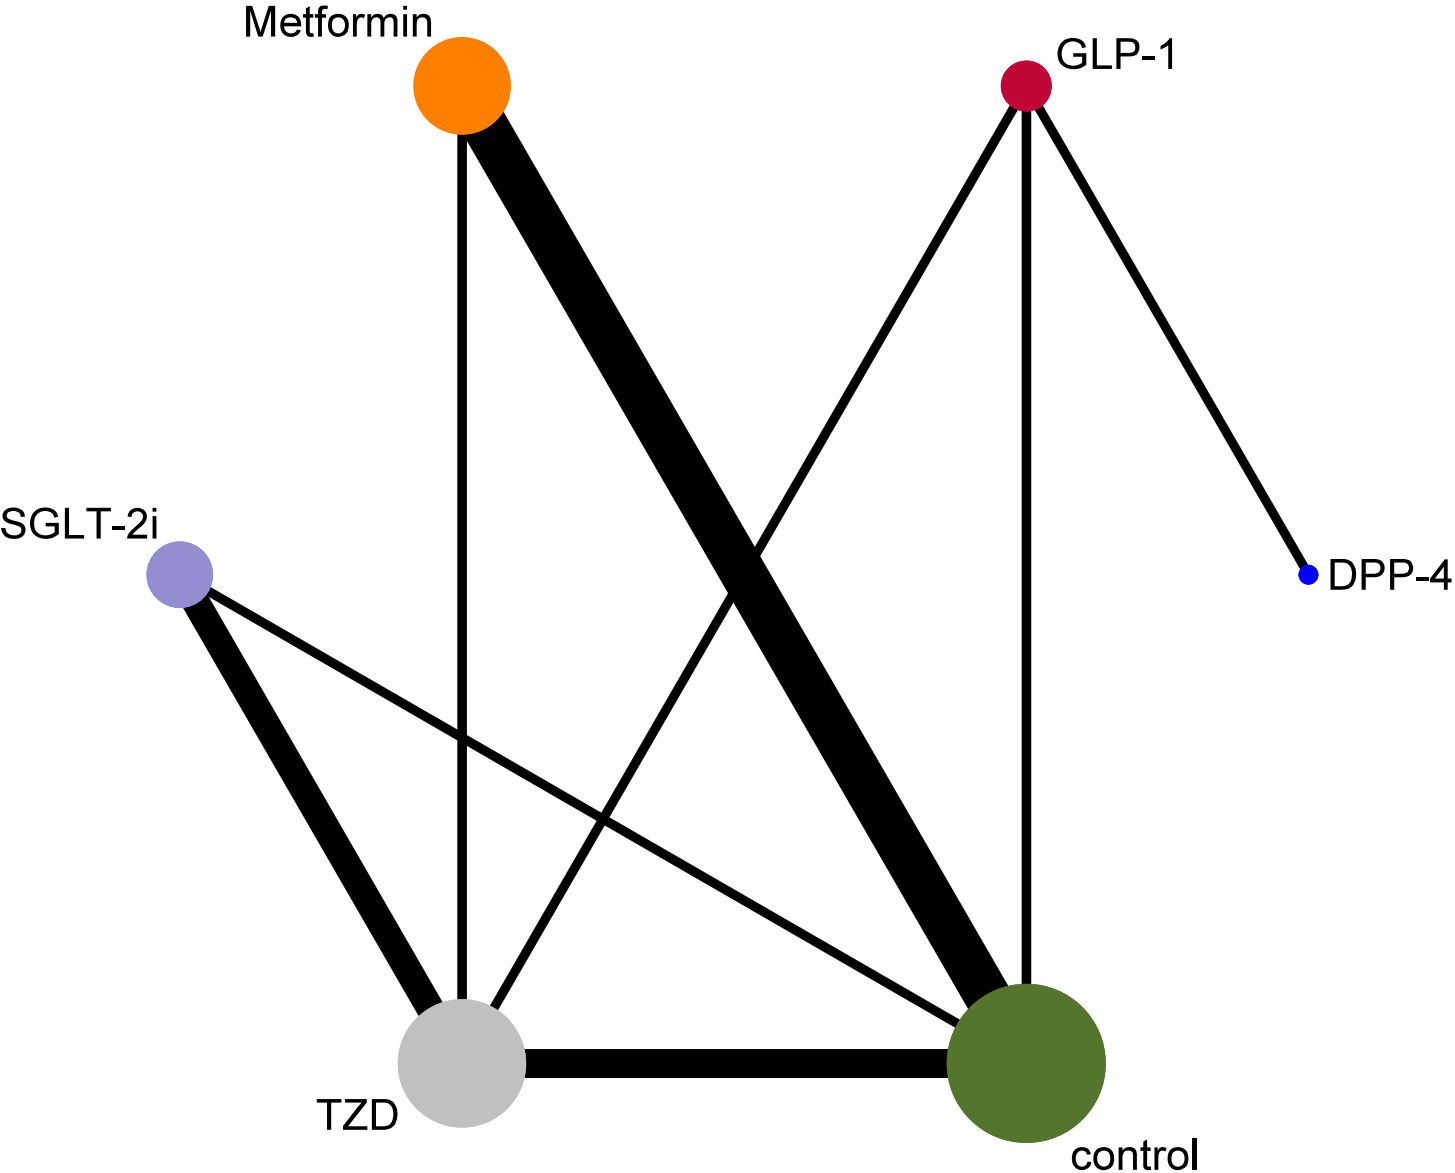

Fig.s11 Network plot for HDL

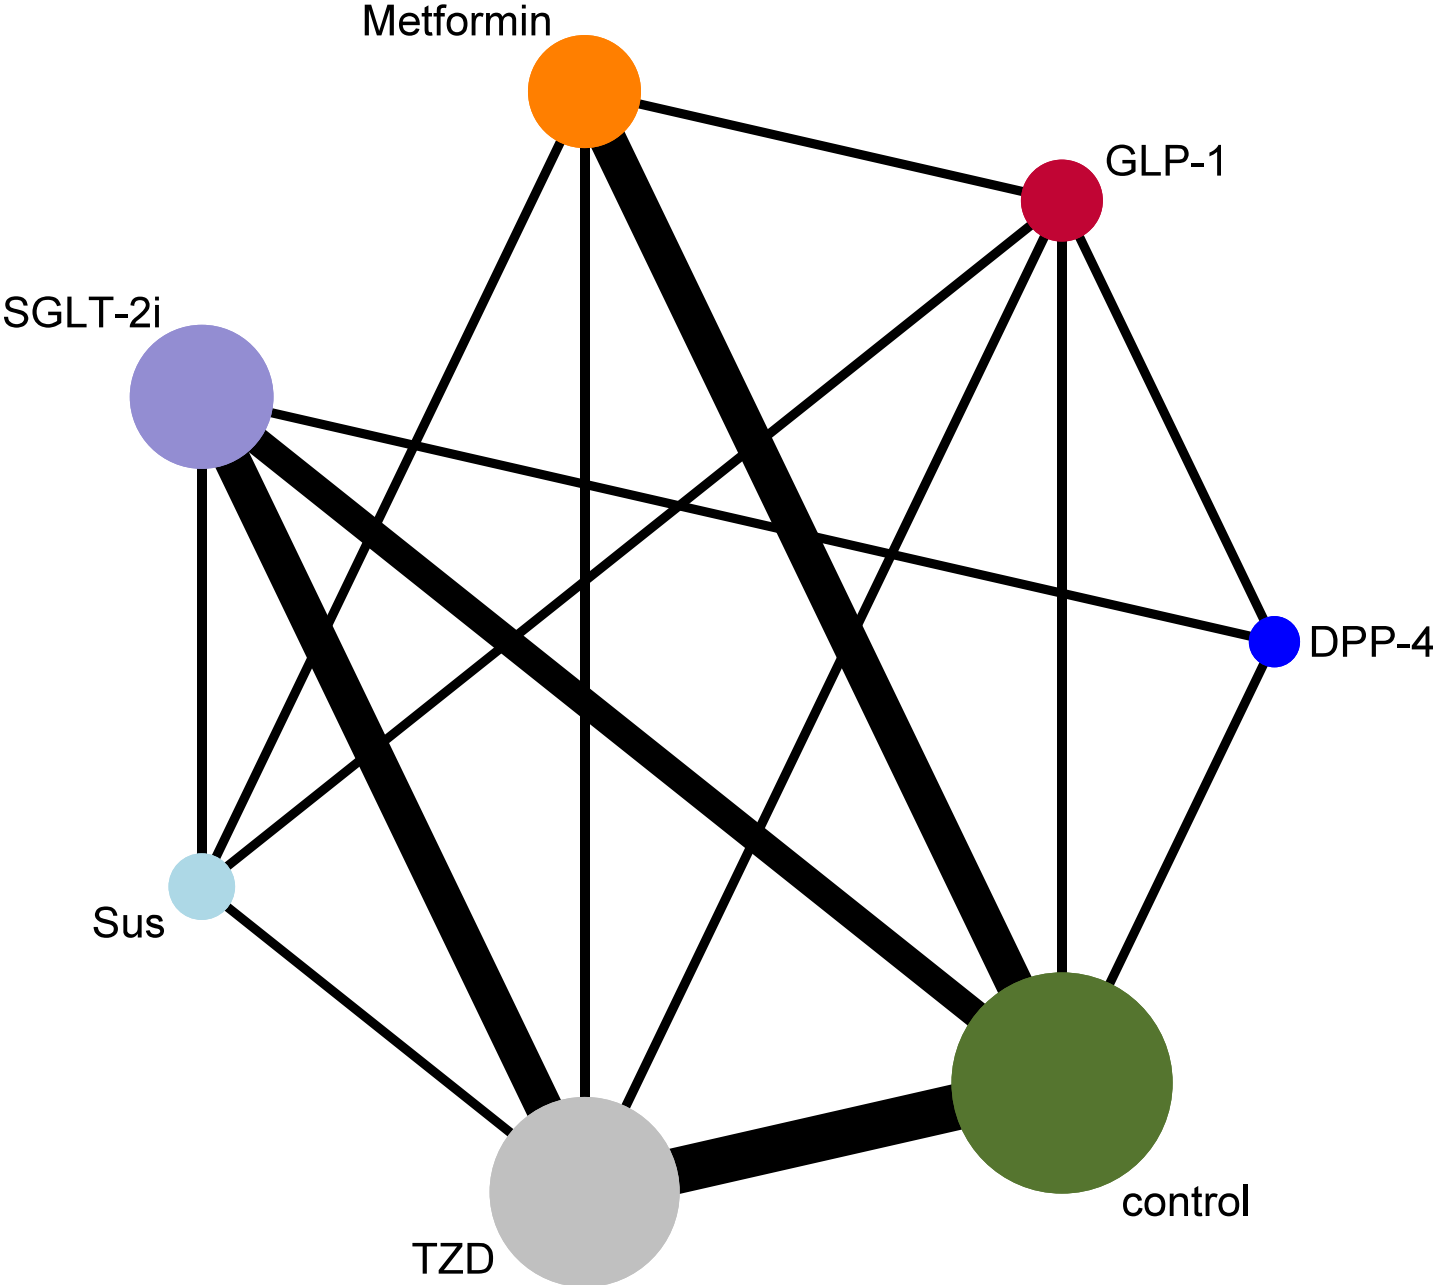

Fig.s12 Network plot for LDL

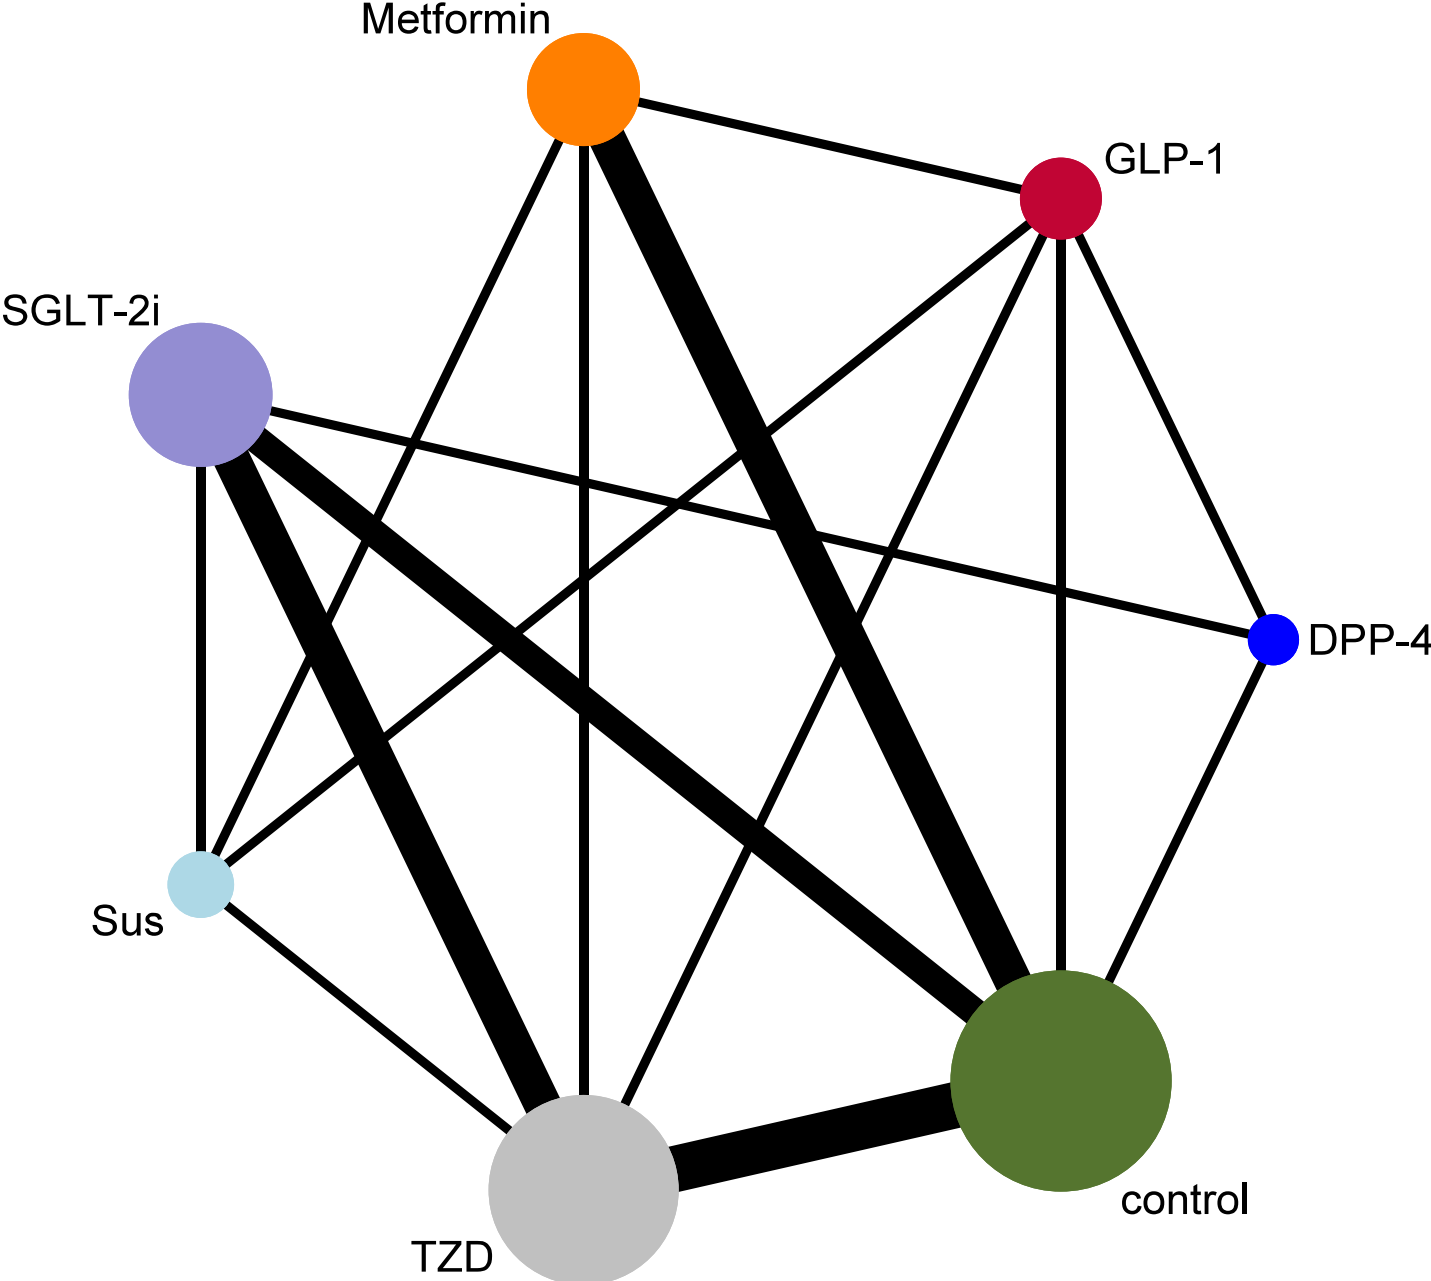

Fig.s13 Network plot for SBP

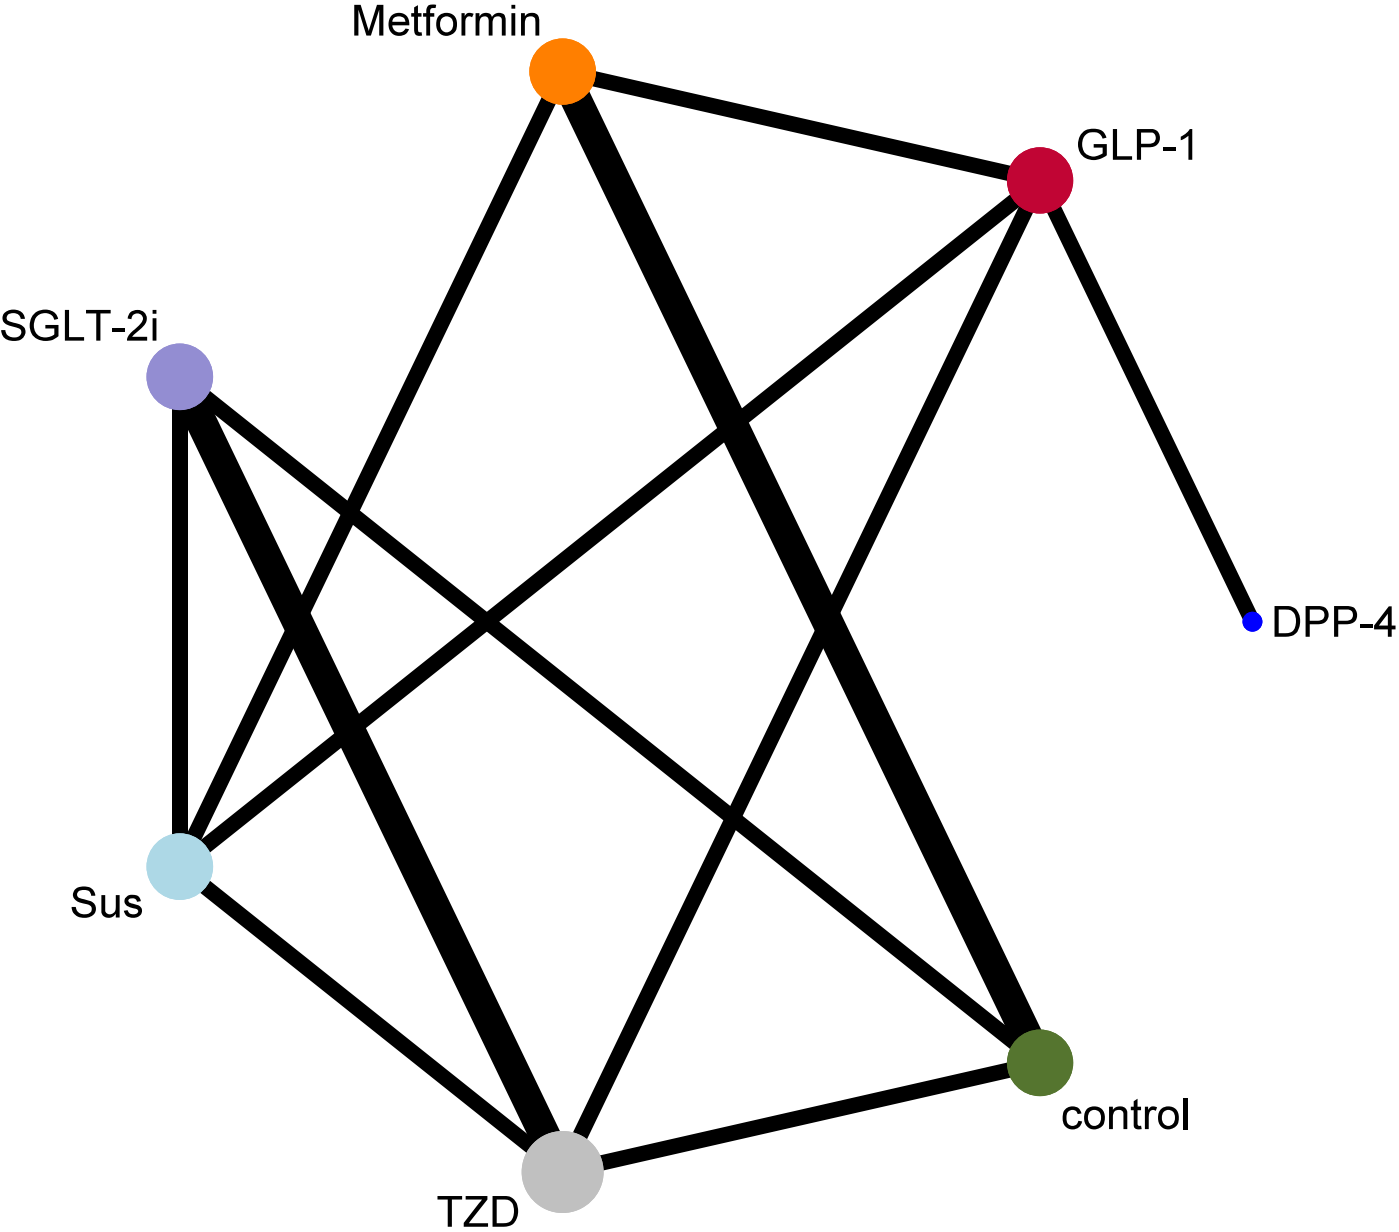

Fig.s14 Network plot for DBP

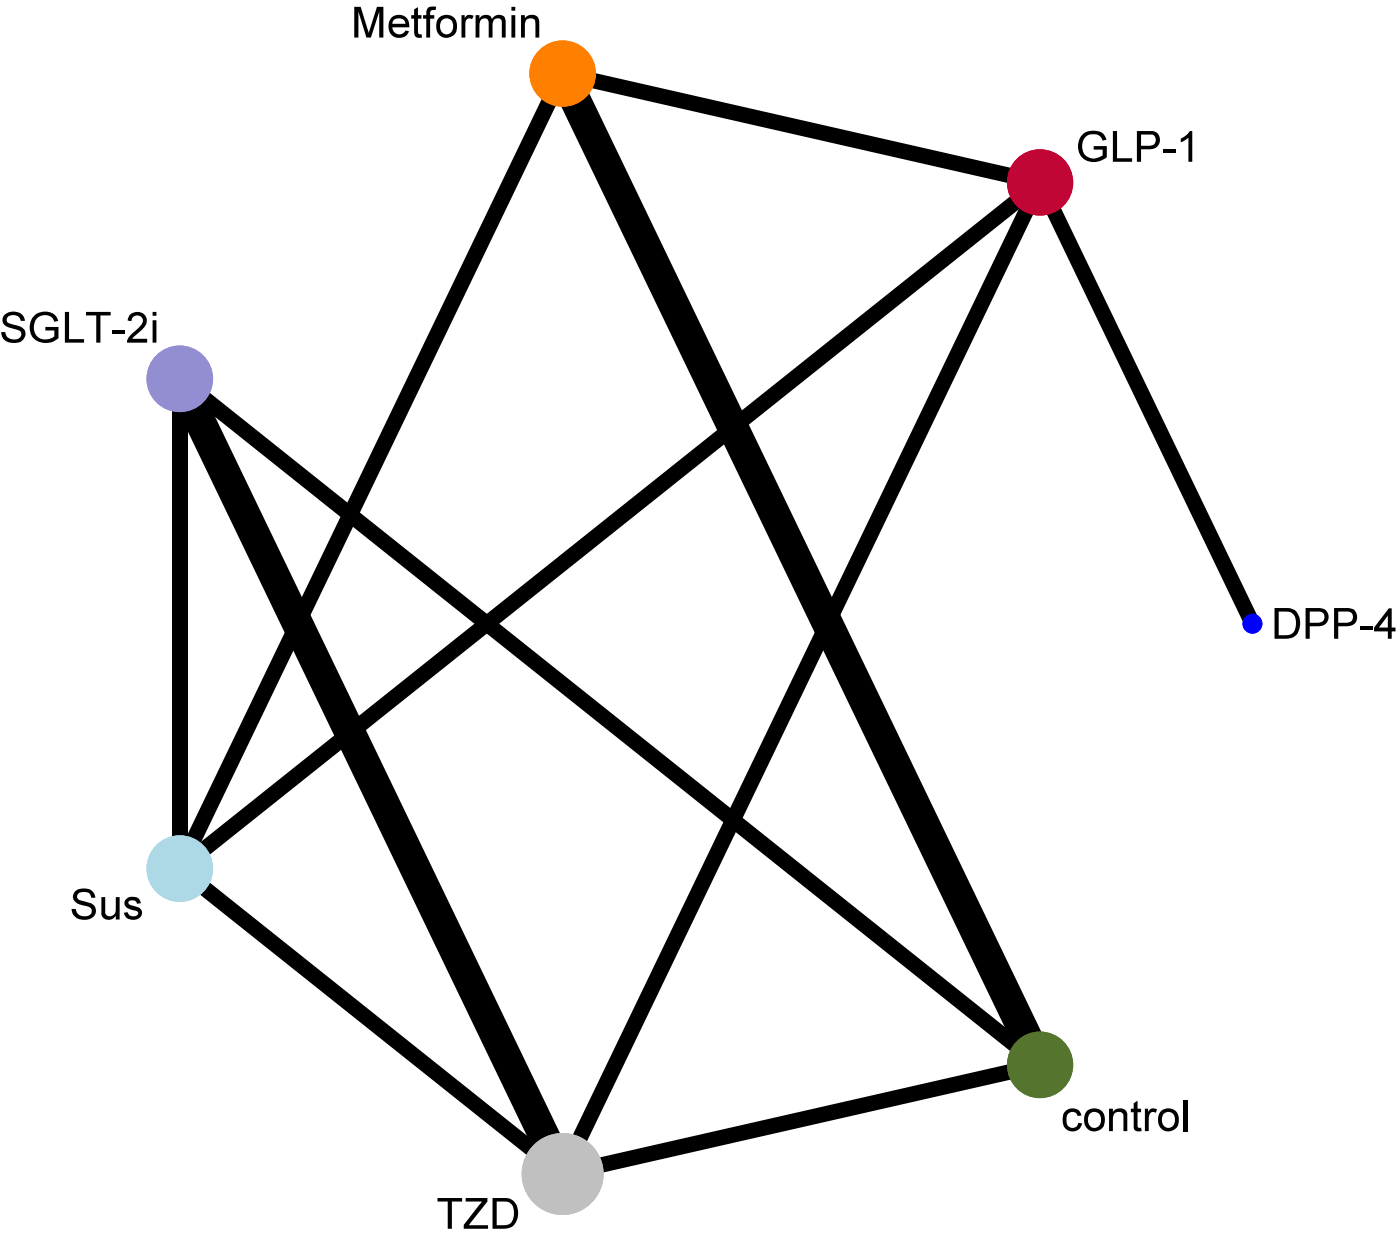



Fig.s15 Network plot for AST

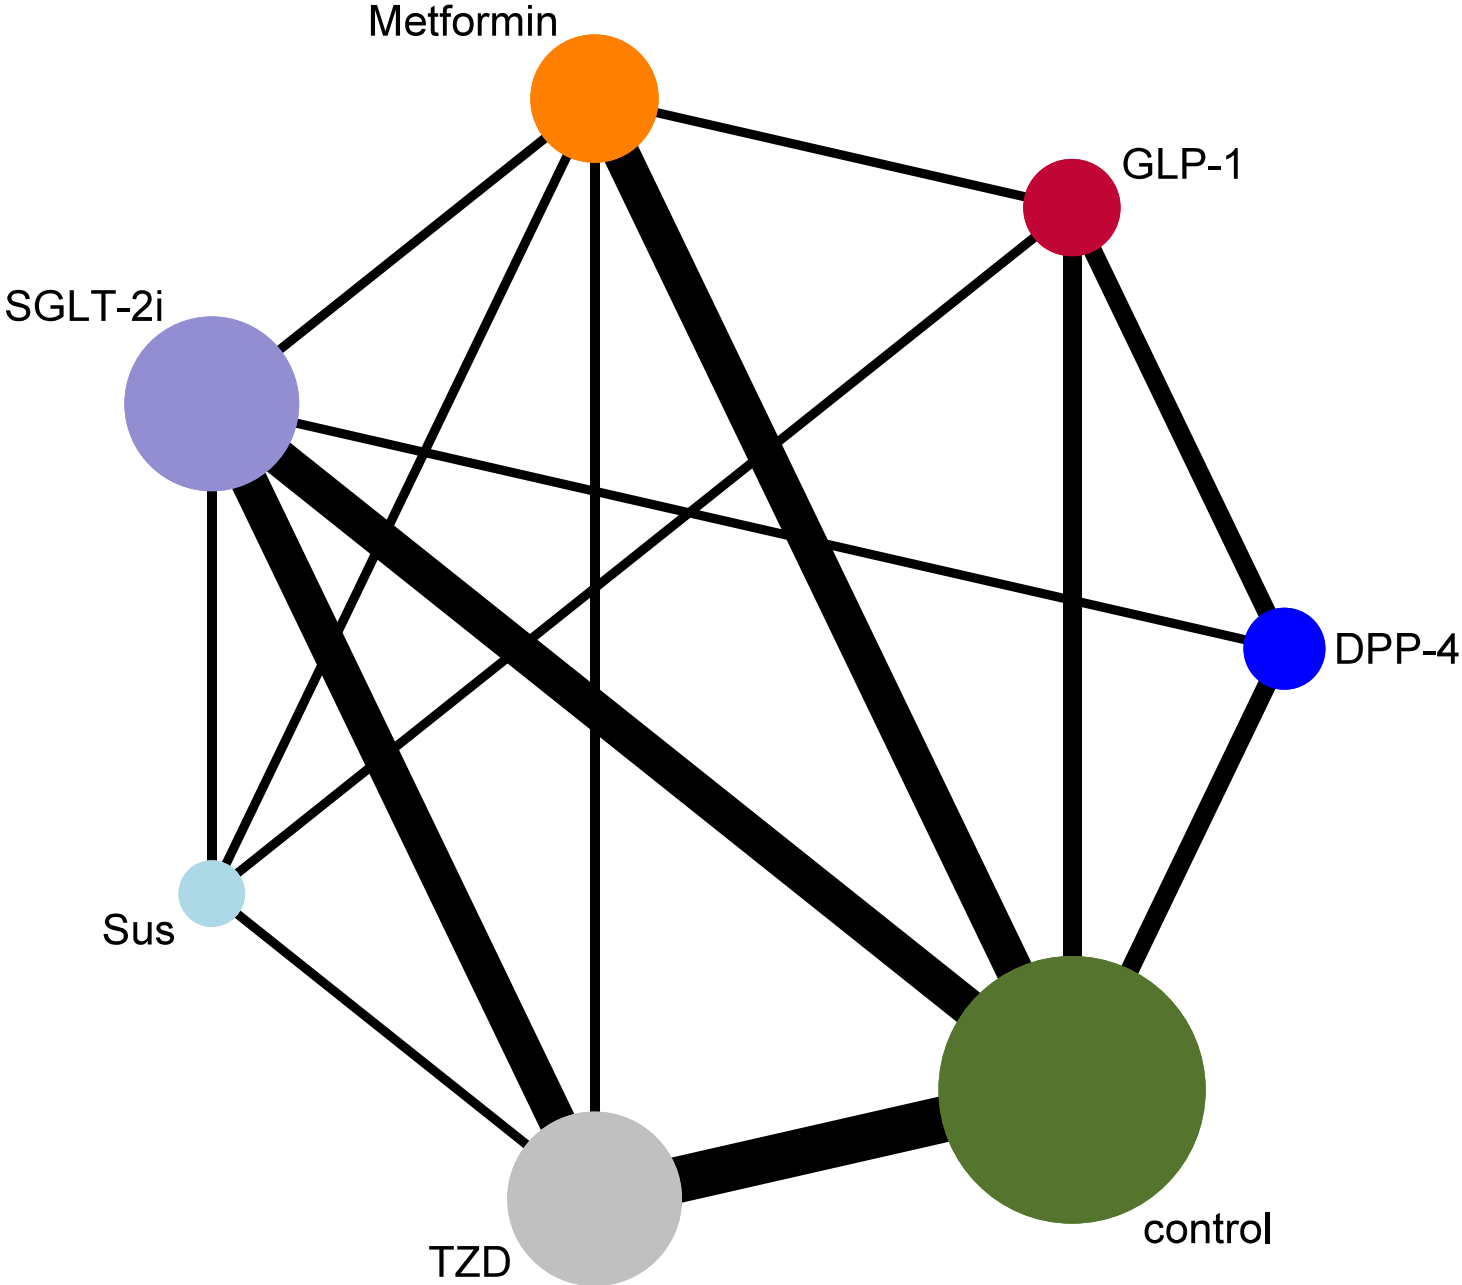

Fig.s16 Network plot for ALT

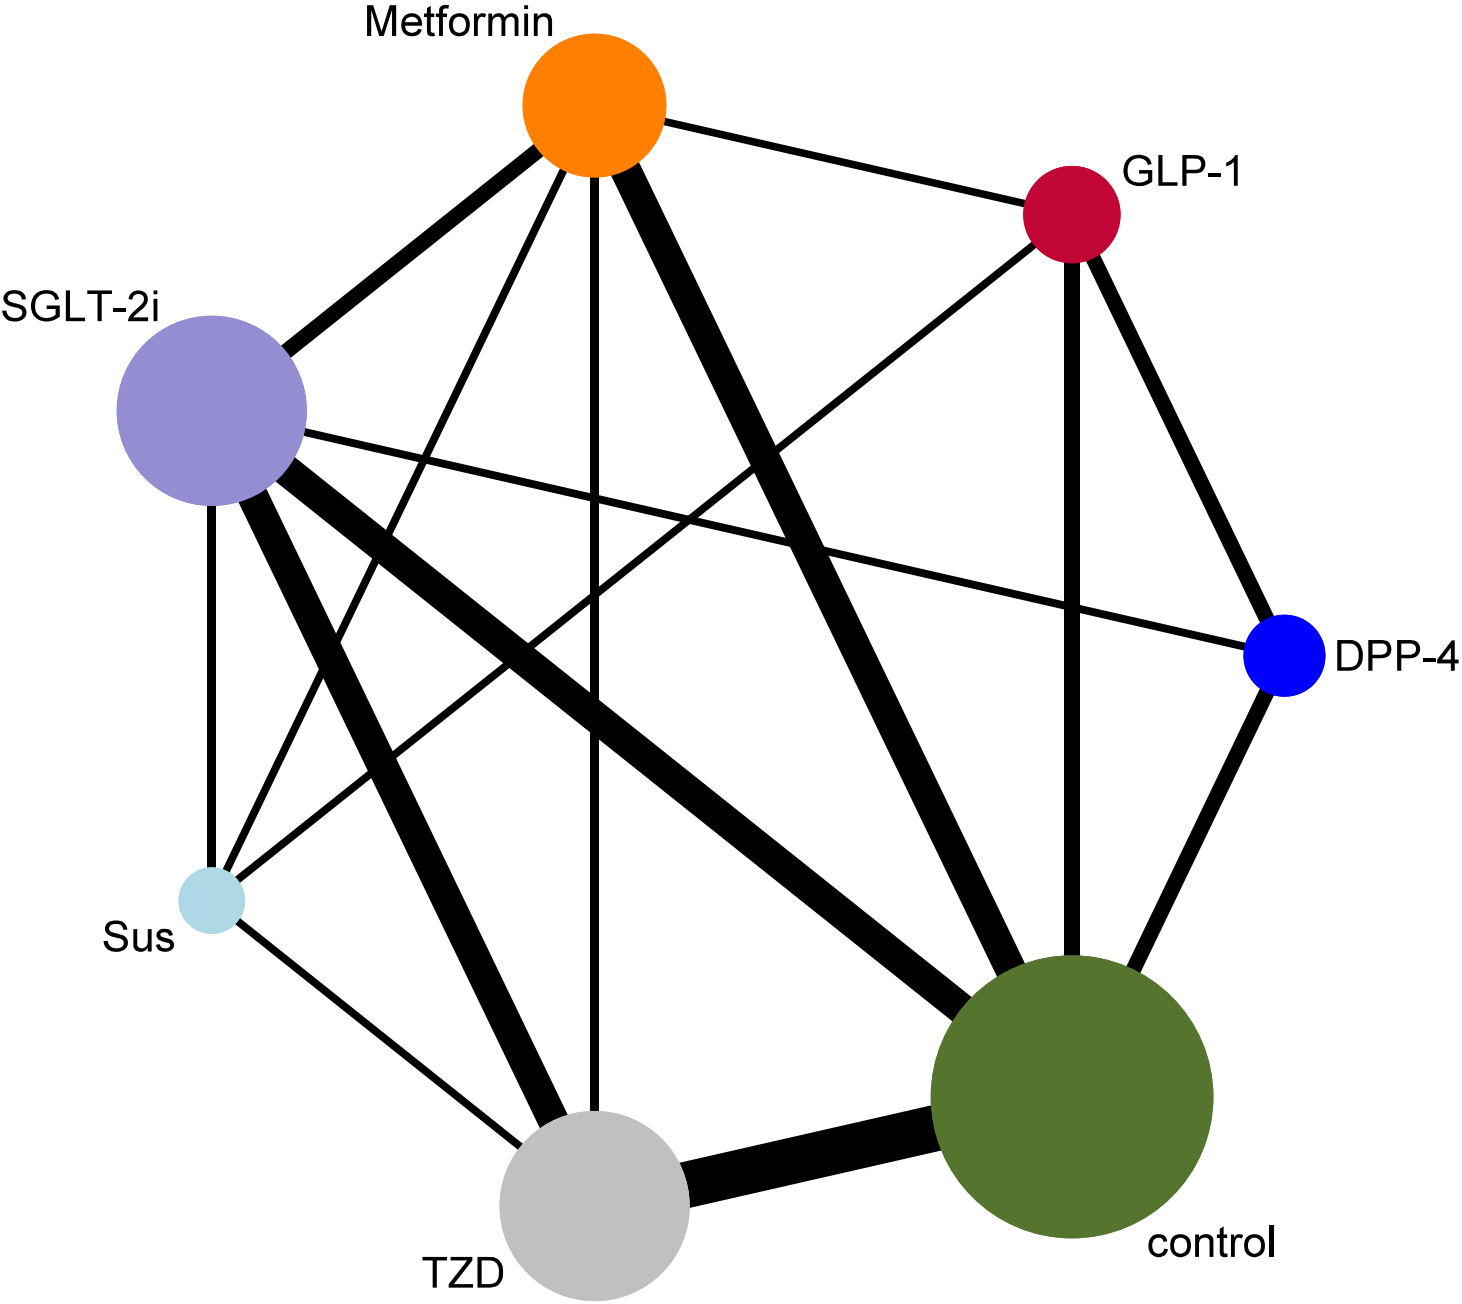

## Appendix 5 Model fit statistics for all outcomes

| Outcome     | Model | DIC      | Dbar     | pD       | ratio  | I <sup>2</sup> | Used in base case analyses |
|-------------|-------|----------|----------|----------|--------|----------------|----------------------------|
| HOMA-IR     | FE    | 52.73121 | 31.6716  | 21.05961 | 0.9897 | 2.000%         | NO                         |
|             | RAN   | 54.04235 | 30.27051 | 23.77185 | 0.946  | 0.000%         | YES                        |
| VAT         | FE    | 33.96985 | 19.9436  | 14.02625 | 1.108  | 15.000%        | NO                         |
|             | RAN   | 34.21679 | 17.83497 | 16.38182 | 0.9908 | 4.000%         | YES                        |
| SAT         | FE    | 15.96671 | 7.98354  | 7.983172 | 0.9979 | 12.000%        | YES                        |
|             | RAN   | 15.93458 | 7.967794 | 7.966786 | 0.996  | 12.000%        | NO                         |
| BMI         | FE    | 72.01006 | 49.01922 | 22.99084 | 1.362  | 29.000%        | NO                         |
|             | RAN   | 64.04594 | 34.14233 | 29.90361 | 0.9484 | 0.000%         | YES                        |
| Weight      | FE    | 57.0633  | 34.01555 | 23.04775 | 0.9193 | 0.000%         | YES                        |
|             | RAN   | 58.50517 | 33.19511 | 25.31006 | 0.8972 | 0.000%         | NO                         |
| LEPTIN      | FE    | 18.88895 | 9.904476 | 8.984473 | 0.9904 | 9.000%         | NO                         |
|             | RAN   | 19.18426 | 9.805453 | 9.378808 | 0.9805 | 8.000%         | YES                        |
| Adiponectin | FE    | 39.13536 | 25.13102 | 14.00434 | 1.478  | 36.000%        | NO                         |
|             | RAN   | 34.30251 | 17.46657 | 16.83595 | 1.027  | 8.000%         | YES                        |
| FBS         | FE    | 166.9528 | 135.8877 | 31.06513 | 2.954  | 67.000%        | NO                         |
|             | RAN   | 86.67001 | 47.8542  | 38.8158  | 1.04   | 6.000%         | YES                        |
| HbA1C       | FE    | 247.296  | 225.2899 | 22.00612 | 6.258  | 84.000%        | NO                         |
|             | RAN   | 70.73826 | 35.97271 | 34.76556 | 0.9992 | 3.000%         | YES                        |
| TG          | FE    | 66.65405 | 43.67948 | 22.97457 | 1.181  | 18.000%        | NO                         |
|             | RAN   | 67.03778 | 39.29897 | 27.73882 | 1.062  | 8.000%         | YES                        |
| TC          | FE    | 42.74546 | 25.65956 | 17.0859  | 0.9869 | 3.000%         | YES                        |
|             | RAN   | 43.94261 | 24.55648 | 19.38612 | 0.9445 | 0.000%         | NO                         |
| HDL         | FE    | 103.712  | 78.61189 | 25.10011 | 1.872  | 48.000%        | NO                         |
|             | RAN   | 78.66469 | 42.69077 | 35.97392 | 1.016  | 4.000%         | YES                        |
| LDL         | FE    | 105.3713 | 80.12119 | 25.25012 | 1.908  | 49.000%        | NO                         |
|             | RAN   | 82.38497 | 44.89084 | 37.49412 | 1.069  | 9.000%         | YES                        |
| AST         | FE    | 87.57976 | 62.17176 | 25.408   | 1.48   | 34.000%        | NO                         |
|             | RAN   | 74.98211 | 41.78366 | 33.19845 | 0.9948 | 2.000%         | YES                        |
| ALT         | FE    | 149.0912 | 121.6897 | 27.40147 | 2.645  | 63.000%        | NO                         |
|             | RAN   | 84.07908 | 44.58658 | 39.4925  | 0.9693 | 0.000%         | YES                        |
| SBP         | FE    | 39.39381 | 23.38299 | 16.01082 | 1.063  | 10.000%        | NO                         |
|             | RAN   | 39.99386 | 21.51153 | 18.48233 | 0.9778 | 2.000%         | YES                        |
| RBP         | FE    | 39.85949 | 23.79597 | 16.06352 | 1.082  | 12.000%        | NO                         |
|             | RAN   | 40.35654 | 21.57362 | 18.78292 | 0.9806 | 3.000%         | YES                        |

## Appendix 6 Direct, indirect and network treatment estimates

| HOMA-IR      |            |                    |                    |         |                     |
|--------------|------------|--------------------|--------------------|---------|---------------------|
| Intervention | Comparator | Direct estimate    | Indirect estimate  | p value | Network estimate    |
| DPP4         | GLP1       | -0.28 (-2.5, 2.0)  | -3.2 (-5.4, -0.97) | 0.07139 | -1.7 (-3.4, -0.080) |
| DPP4         | SGLT2i     | -2.3 (-5.2, 0.65)  | 0.22 (-1.8, 2.1)   | 0.16513 | -0.55 (-2.3, 1.1)   |
| GLP1         | TZD        | 0.70 (-1.2, 2.6)   | 0.32 (-1.5, 1.7)   | 0.72031 | 0.47 (-0.73, 1.5)   |
| SGLT2i       | TZD        | -0.87 (-1.9, 0.14) | 0.084 (-1.6, 2.3)  | 0.32211 | -0.75 (-1.4, 0.086) |
| DPP4         | control    | -0.76 (-3.7, 2.1)  | 0.018 (-1.9, 2.)   | 0.64307 | -0.19 (-1.8, 1.4)   |
| GLP1         | control    | 1.8 (0.41, 3.2)    | 1.0 (-0.81, 2.7)   | 0.44376 | 1.6 (0.46, 2.5)     |
| SGLT2i       | control    | 0.22 (-0.71, 1.3)  | 0.81 (-0.58, 2.4)  | 0.45312 | 0.34 (-0.23, 1.1)   |
| TZD          | control    | 0.93 (-0.53, 2.3)  | 1.2 (-0.16, 2.5)   | 0.7847  | 1.1 (0.31, 1.9)     |
| control      | metformin  | -0.13 (-1.4, 1.2)  | 1.6 (-0.41, 3.5)   | 0.14773 | 0.38 (-0.72, 1.5)   |
| SGLT2i       | metformin  | 1.8 (-0.080, 3.7)  | 0.10 (-1.3, 1.7)   | 0.16226 | 0.73 (-0.40, 2.0)   |

| VAT          |            |                      |                      |         |                      |
|--------------|------------|----------------------|----------------------|---------|----------------------|
| Intervention | Comparator | Direct estimate      | Indirect estimate    | p value | Network estimate     |
| TZD          | control    | -0.053 (-0.71, 0.60) | -0.018 (-0.69, 0.57) | 0.9209  | -0.015 (-0.32, 0.23) |

| BMI          |            |                    |                     |         |                    |
|--------------|------------|--------------------|---------------------|---------|--------------------|
| Intervention | Comparator | Direct estimate    | Indirect estimate   | p value | Network estimate   |
| DPP4         | GLP1       | -0.29 (-3.0, 2.5)  | -1.4 (-5.7, 2.8)    | 0.64847 | -0.59 (-2.9, 1.6)  |
| DPP4         | SGLT2i     | -1.3 (-5.6, 3.1)   | 0.21 (-2.9, 3.6)    | 0.57127 | -0.28 (-2.8, 2.3)  |
| GLP1         | TZD        | 3.6 (1.1, 6.1)     | 0.46 (-1.2, 2.3)    | 0.04853 | 1.6 (-0.023, 3.3)  |
| GLP1         | metformin  | -0.66 (-2.7, 1.3)  | 1.4 (-0.87, 3.4)    | 0.15348 | 0.12 (-1.3, 1.8)   |
| DPP4         | control    | 1.1 (-6.4, 8.9)    | 0.64 (-1.9, 3.2)    | 0.90678 | 0.70 (-1.7, 3.2)   |
| GLP1         | control    | 1.3 (-1.8, 4.4)    | 1.3 (-0.55, 3.4)    | 0.98956 | 1.3 (-0.19, 2.9)   |
| SGLT2i       | control    | 0.91 (-0.77, 2.6)  | 1.2 (-1.6, 4.1)     | 0.86902 | 0.98 (-0.40, 2.4)  |
| TZD          | control    | -0.24 (-1.1, 0.75) | -2.6 (-5.3, 0.0025) | 0.08271 | -0.28 (-1.4, 0.86) |
| control      | metformin  | -1.0 (-2.2, 0.19)  | -2.2 (-3.7, -0.53)  | 0.23262 | -1.2 (-2.4, 0.14)  |
| SGLT2i       | metformin  | -0.39 (-3.4, 2.6)  | -0.062 (-2.1, 2.1)  | 0.8522  | -0.17 (-1.8, 1.5)  |
| TZD          | metformin  | 0.80 (-0.93, 2.5)  | -2.8 (-4.0, -1.4)   | 0.00591 | -1.4 (-2.9, 0.11)  |

| Weight       |            |                    |                   |         |                    |
|--------------|------------|--------------------|-------------------|---------|--------------------|
| Intervention | Comparator | Direct estimate    | Indirect estimate | p value | Network estimate   |
| DPP4         | GLP1       | -3.6 (-11., 3.9)   | -3.8 (-18., 10.)  | 0.96857 | -3.7 (-10., 2.7)   |
| DPP4         | SGLT2i     | -3.3 (-18., 12.)   | -1.6 (-9.2, 6.4)  | 0.84359 | -2.1 (-8.7, 4.7)   |
| GLP1         | SUs        | 3.8 (0.55, 7.2)    | 6.9 (1.5, 12.)    | 0.28787 | 4.3 (1.9, 7.4)     |
| GLP1         | TZD        | 9.9 (4.4, 15.)     | 3.9 (0.52, 6.9)   | 0.06013 | 5.1 (2.4, 8.4)     |
| GLP1         | metformin  | -4.3 (-7.6, -0.94) | 5.9 (-4.3, 16.)   | 0.06169 | -3.8 (-6.1, 0.25)  |
| SGLT2i       | SUs        | 2.8 (-1.6, 7.2)    | 2.1 (-3.8, 9.1)   | 0.81428 | 2.7 (0.078, 5.6)   |
| SGLT2i       | TZD        | 2.8 (-0.82, 5.8)   | 6.2 (0.96, 12.)   | 0.23798 | 3.5 (1.3, 5.9)     |
| SUs          | TZD        | 0.38 (-4.2, 4.9)   | 1.8 (-4.8, 7.2)   | 0.63809 | 0.80 (-1.9, 3.5)   |
| DPP4         | control    | 5.2 (-28., 36.)    | -0.96 (-8.4, 6.2) | 0.71945 | -0.95 (-7.7, 5.8)  |
| GLP1         | control    | 2.2 (-4.2, 8.5)    | 3. (-0.68, 7.3)   | 0.82101 | 2.7 (-0.24, 6.1)   |
| SGLT2i       | control    | 2.1 (-1.5, 5.8)    | 0.13 (-4.5, 4.2)  | 0.4471  | 1.1 (-1.3, 3.7)    |
| TZD          | control    | -2.3 (-5.2, 0.66)  | -2.6 (-7.3, 1.7)  | 0.89831 | -2.4 (-4.7, -0.19) |
| control      | metformin  | 1.2 (-8.5, 11.)    | -7.3 (-12., -3.7) | 0.10868 | -6.4 (-9.8, -2.3)  |
| SUs          | metformin  | -8.1 (-11., -4.8)  | -0.95 (-11., 9.3) | 0.16962 | -8.0 (-11., -4.4)  |

| LEPTIN       |            |                  |                   |         |                  |
|--------------|------------|------------------|-------------------|---------|------------------|
| Intervention | Comparator | Direct estimate  | Indirect estimate | p value | Network estimate |
| DPP4         | SGLT2i     | -6.3 (-24., 11.) | 3.6 (-17., 24.)   | 0.44967 | -1.8 (-15., 11.) |
| DPP4         | control    | 8.7 (-8.2, 26.)  | -1.0 (-22., 20.)  | 0.45479 | 4.7 (-8.2, 18.)  |
| SGLT2i       | control    | 5.1 (-6.9, 17.)  | 15. (-9.4, 39.)   | 0.45543 | 6.4 (-3.2, 18.)  |

| FBS          |            |                      |                     |         |                      |
|--------------|------------|----------------------|---------------------|---------|----------------------|
| Intervention | Comparator | Direct estimate      | Indirect estimate   | p value | Network estimate     |
| DPP4         | GLP1       | -0.30 (-1.9, 1.3)    | -0.10 (-1.4, 1.2)   | 0.85264 | -0.18 (-1.2, 0.80)   |
| DPP4         | SGLT2i     | 0.088 (-0.99, 1.2)   | 0.36 (-1.3, 2.1)    | 0.78897 | 0.15 (-0.68, 1.0)    |
| GLP1         | SUs        | 0.61 (-0.43, 1.7)    | 1.6 (0.29, 2.9)     | 0.22515 | 0.95 (0.22, 1.8)     |
| GLP1         | TZD        | 1.1 (-0.66, 2.9)     | 0.046 (-0.72, 0.83) | 0.27588 | 0.20 (-0.49, 0.93)   |
| GLP1         | metformin  | 0.28 (-0.76, 1.3)    | 0.93 (-0.070, 2.0)  | 0.34889 | 0.52 (-0.12, 1.3)    |
| SGLT2i       | SUs        | 0.78 (-0.29, 1.9)    | 0.32 (-0.80, 1.5)   | 0.5149  | 0.61 (-0.083, 1.3)   |
| SGLT2i       | TZD        | -0.25 (-0.95, 0.41)  | 0.049 (-0.84, 0.97) | 0.56726 | -0.14 (-0.64, 0.35)  |
| SUs          | TZD        | -1.0 (-2.1, 0.032)   | -0.43 (-1.5, 0.64)  | 0.38581 | -0.75 (-1.4, -0.076) |
| DPP4         | control    | 3.2 (-1.5, 7.9)      | 0.39 (-0.56, 1.4)   | 0.25575 | 0.48 (-0.43, 1.4)    |
| GLP1         | control    | 0.90 (-0.38, 2.2)    | 0.58 (-0.20, 1.5)   | 0.67466 | 0.66 (0.018, 1.4)    |
| SGLT2i       | control    | 0.25 (-0.51, 1.1)    | 0.39 (-0.33, 1.1)   | 0.79212 | 0.33 (-0.16, 0.83)   |
| TZD          | control    | 0.57 (0.081, 1.1)    | 0.51 (-0.31, 1.3)   | 0.89155 | 0.47 (0.044, 0.91)   |
| control      | metformin  | -0.080 (-0.51, 0.48) | -0.19 (-1.1, 0.63)  | 0.81159 | -0.15 (-0.55, 0.31)  |
| SGLT2i       | metformin  | 0.40 (-0.81, 1.6)    | 0.13 (-0.49, 0.83)  | 0.68364 | 0.18 (-0.35, 0.77)   |
| SUs          | metformin  | -0.33 (-1.4, 0.72)   | -0.66 (-1.6, 0.48)  | 0.62555 | -0.43 (-1.1, 0.30)   |
| TZD          | metformin  | -0.39 (-1.2, 0.46)   | 0.59 (0.091, 1.2)   | 0.04586 | 0.32 (-0.16, 0.88)   |

| TC           |            |                     |                    |         |                     |
|--------------|------------|---------------------|--------------------|---------|---------------------|
| Intervention | Comparator | Direct estimate     | Indirect estimate  | p value | Network estimate    |
| GLP1         | TZD        | -0.29 (-1.1, 0.53)  | 0.45 (-0.44, 1.3)  | 0.22593 | 0.048 (-0.55, 0.64) |
| GLP1         | control    | 0.60 (-0.18, 1.4)   | -0.15 (-1.0, 0.72) | 0.20707 | 0.26 (-0.33, 0.84)  |
| SGLT2i       | control    | 0.33 (-0.26, 0.93)  | 0.35 (-0.31, 1.1)  | 0.96276 | 0.35 (-0.037, 0.75) |
| TZD          | control    | 0.20 (-0.17, 0.59)  | 0.90 (-0.24, 2.0)  | 0.2477  | 0.21 (-0.10, 0.54)  |
| TZD          | metformin  | 0.035 (-0.59, 0.65) | 0.15 (-0.30, 0.59) | 0.76213 | 0.15 (-0.23, 0.50)  |

| TG           |            |                      |                       |         |                       |
|--------------|------------|----------------------|-----------------------|---------|-----------------------|
| Intervention | Comparator | Direct estimate      | Indirect estimate     | p value | Network estimate      |
| DPP4         | GLP1       | -0.088 (-1.0, 0.84)  | -0.0036 (-0.82, 0.87) | 0.8908  | -0.047 (-0.66, 0.58)  |
| DPP4         | SGLT2i     | 0.43 (-0.36, 1.2)    | 0.74 (-0.11, 1.6)     | 0.59466 | 0.57 (0.011, 1.1)     |
| SGLT2i       | TZD        | -0.11 (-0.41, 0.24)  | -0.11 (-0.64, 0.48)   | 0.9952  | -0.12 (-0.33, 0.14)   |
| DPP4         | control    | 1.0 (-0.18, 2.3)     | 0.44 (-0.20, 1.1)     | 0.39561 | 0.58 (0.019, 1.1)     |
| GLP1         | control    | 0.60 (0.094, 1.1)    | 0.69 (-0.45, 1.9)     | 0.88799 | 0.62 (0.18, 1.1)      |
| SGLT2i       | control    | 0.0070 (-0.34, 0.38) | 0.026 (-0.40, 0.51)   | 0.93028 | -0.0015 (-0.24, 0.27) |
| TZD          | control    | 0.093 (-0.29, 0.48)  | 0.17 (-0.43, 0.81)    | 0.80723 | 0.12 (-0.13, 0.35)    |
| TZD          | metformin  | 0.30 (-0.28, 0.88)   | 0.20 (-0.26, 0.74)    | 0.7454  | 0.23 (-0.055, 0.56)   |

| HDL          |            |                       |                       |         |                       |
|--------------|------------|-----------------------|-----------------------|---------|-----------------------|
| Intervention | Comparator | Direct estimate       | Indirect estimate     | p value | Network estimate      |
| DPP4         | GLP1       | 0.00015 (-0.26, 0.26) | 0.11 (-0.18, 0.44)    | 0.56204 | 0.045 (-0.14, 0.25)   |
| DPP4         | SGLT2i     | 0.22 (-0.081, 0.52)   | 0.029 (-0.26, 0.29)   | 0.33644 | 0.12 (-0.086, 0.31)   |
| GLP1         | SUs        | 0.090 (-0.11, 0.29)   | -0.22 (-0.49, 0.035)  | 0.05569 | -0.013 (-0.21, 0.14)  |
| GLP1         | TZD        | -0.20 (-0.47, 0.070)  | 0.27 (0.11, 0.39)     | 0.00619 | 0.13 (-0.054, 0.28)   |
| GLP1         | metformin  | 0.16 (-0.034, 0.35)   | -0.16 (-0.40, 0.061)  | 0.03203 | 0.038 (-0.15, 0.18)   |
| SGLT2i       | SUs        | -0.060 (-0.26, 0.14)  | -0.063 (-0.27, 0.18)  | 0.97096 | -0.085 (-0.24, 0.074) |
| SGLT2i       | TZD        | -0.060 (-0.26, 0.14)  | -0.063 (-0.27, 0.18)  | 0.19886 | -0.085 (-0.24, 0.074) |
| SUs          | TZD        | 0.26 (0.061, 0.46)    | 0.081 (-0.16, 0.27)   | 0.1579  | 0.15 (-0.013, 0.29)   |
| DPP4         | control    | -0.011 (-0.46, 0.44)  | 0.12 (-0.12, 0.34)    | 0.60325 | 0.10 (-0.11, 0.29)    |
| GLP1         | control    | -0.20 (-0.62, 0.23)   | 0.094 (-0.094, 0.24)  | 0.22022 | 0.056 (-0.13, 0.20)   |
| SGLT2i       | control    | -0.025 (-0.19, 0.14)  | -0.0093 (-0.20, 0.16) | 0.88933 | -0.014 (-0.13, 0.093) |
| TZD          | control    | -0.076 (-0.20, 0.054) | -0.086 (-0.30, 0.13)  | 0.92941 | -0.079 (-0.17, 0.018) |
| control      | metformin  | -0.051 (-0.18, 0.081) | 0.11 (-0.14, 0.40)    | 0.2313  | -0.020 (-0.13, 0.092) |
| SUs          | metformin  | 0.070 (-0.13, 0.26)   | 0.057 (-0.16, 0.27)   | 0.92242 | 0.052 (-0.12, 0.20)   |
| TZD          | metformin  | -0.12 (-0.41, 0.18)   | -0.092 (-0.25, 0.077) | 0.85851 | -0.099 (-0.23, 0.034) |

| LDL          |            |                      |                      |         |                       |
|--------------|------------|----------------------|----------------------|---------|-----------------------|
| Intervention | Comparator | Direct estimate      | Indirect estimate    | p value | Network estimate      |
| DPP4         | GLP1       | -0.20 (-1.0, 0.60)   | 0.093 (-0.68, 0.87)  | 0.58528 | -0.047 (-0.58, 0.49)  |
| DPP4         | SGLT2i     | 0.28 (-0.65, 1.2)    | -0.29 (-0.96, 0.37)  | 0.30678 | -0.11 (-0.64, 0.44)   |
| GLP1         | SUs        | 0.17 (-0.59, 0.94)   | 0.24 (-0.64, 1.1)    | 0.89713 | 0.19 (-0.30, 0.69)    |
| GLP1         | TZD        | 0.0032 (-0.96, 0.96) | -0.11 (-0.62, 0.41)  | 0.83037 | -0.093 (-0.52, 0.35)  |
| GLP1         | metformin  | -0.021 (-0.78, 0.74) | 0.017 (-0.68, 0.71)  | 0.93791 | -0.0056 (-0.45, 0.44) |
| SGLT2i       | SUs        | 0.24 (-0.52, 1.0)    | 0.23 (-0.60, 1.0)    | 0.9884  | 0.26 (-0.22, 0.71)    |
| SGLT2i       | TZD        | 0.016 (-0.41, 0.44)  | -0.19 (-0.88, 0.48)  | 0.58701 | -0.028 (-0.34, 0.27)  |
| SUs          | TZD        | -0.33 (-1.1, 0.44)   | -0.25 (-1.0, 0.55)   | 0.86892 | -0.28 (-0.73, 0.17)   |
| DPP4         | control    | -0.12 (-0.95, 0.72)  | 0.076 (-0.60, 0.79)  | 0.71147 | -0.0051 (-0.51, 0.52) |
| GLP1         | control    | -0.10 (-0.88, 0.68)  | 0.11 (-0.39, 0.64)   | 0.62855 | 0.041 (-0.36, 0.47)   |
| SGLT2i       | control    | 0.14 (-0.32, 0.60)   | 0.053 (-0.47, 0.58)  | 0.77985 | 0.11 (-0.21, 0.42)    |
| TZD          | control    | 0.24 (-0.093, 0.60)  | -0.015 (-0.55, 0.49) | 0.36732 | 0.13 (-0.14, 0.42)    |
| control      | metformin  | -0.13 (-0.50, 0.18)  | 0.026 (-0.60, 0.64)  | 0.6242  | -0.047 (-0.39, 0.27)  |
| SUs          | metformin  | -0.19 (-0.95, 0.57)  | -0.22 (-1.1, 0.59)   | 0.9486  | -0.20 (-0.68, 0.27)   |
| TZD          | metformin  | 0.23 (-0.28, 0.73)   | 0.12 (-0.094, 0.30)  | 0.66501 | 0.087 (-0.31, 0.47)   |

| SBP          |            |                  |                   |         |                  |
|--------------|------------|------------------|-------------------|---------|------------------|
| Intervention | Comparator | Direct estimate  | Indirect estimate | p value | Network estimate |
| GLP1         | SUs        | 6.2 (-3.2, 16.)  | 8.8 (-6.9, 24.)   | 0.72733 | 6.5 (0.49, 13.)  |
| GLP1         | TZD        | 3.2 (-9.0, 15.)  | 0.65 (-8., 11.)   | 0.74069 | 1.0 (-4.7, 9.0)  |
| GLP1         | metformin  | 4.3 (-5.0, 14.)  | 4.6 (-13., 22.)   | 0.98324 | 4.3 (-2.3, 11.)  |
| SGLT2i       | SUs        | 5.8 (-3.0, 15.)  | 6.4 (-6.3, 20.)   | 0.91789 | 6.0 (0.21, 13.)  |
| SGLT2i       | TZD        | 1.4 (-4.6, 10.)  | -1.5 (-16., 12.)  | 0.65127 | 0.53 (-3.6, 7.1) |
| SUs          | TZD        | -6.5 (-15., 2.2) | -2.3 (-14., 8.7)  | 0.46788 | -5.6 (-10., 1.2) |
| SGLT2i       | control    | -1.0 (-11., 9.4) | 2.4 (-5.6, 13.)   | 0.56456 | 0.98 (-4.9, 7.8) |
| TZD          | control    | 0.88 (-7.6, 9.4) | -0.56 (-11., 7.8) | 0.78831 | 0.27 (-5.9, 5.7) |
| control      | metformin  | 1.8 (-7.1, 11.)  | 3.7 (-8.2, 15.)   | 0.75883 | 2.8 (-4.0, 8.9)  |
| SUs          | metformin  | -1.8 (-11., 7.5) | -4.2 (-18., 10.)  | 0.72414 | -2.2 (-8.7, 3.7) |

| DBP          |            |                    |                    |         |                    |
|--------------|------------|--------------------|--------------------|---------|--------------------|
| Intervention | Comparator | Direct estimate    | Indirect estimate  | p value | Network estimate   |
| GLP1         | SUs        | -0.050 (-7.0, 6.9) | -2.9 (-15., 8.3)   | 0.60556 | -0.34 (-5.1, 3.5)  |
| GLP1         | TZD        | -2.3 (-11., 6.4)   | -0.021 (-6.3, 6.8) | 0.62453 | -0.41 (-5.3, 3.9)  |
| GLP1         | metformin  | 1.6 (-5.4, 8.6)    | -0.26 (-13., 12.)  | 0.76696 | 1.5 (-3.1, 5.7)    |
| SGLT2i       | SUs        | 0.30 (-5.8, 6.4)   | 4.1 (-4.2, 13.)    | 0.33314 | 1.0 (-2.4, 5.8)    |
| SGLT2i       | TZD        | 0.72 (-3.6, 6.6)   | 3.9 (-5.2, 13.)    | 0.48409 | 0.98 (-1.8, 5.2)   |
| SUs          | TZD        | -0.20 (-6.2, 5.8)  | -0.37 (-8.3, 6.8)  | 0.96336 | -0.057 (-3.7, 3.9) |
| SGLT2i       | control    | 0.012 (-5.9, 6.)   | -3.4 (-8.2, 2.6)   | 0.33282 | -2. (-5.6, 2.4)    |
| TZD          | control    | -4.5 (-9.5, 0.81)  | -1.9 (-7.7, 3.6)   | 0.44359 | -3.1 (-6.9, 0.42)  |
| control      | metformin  | 5.3 (0.11, 11.)    | 4.7 (-2.9, 13.)    | 0.89485 | 5. (1.4, 9.1)      |
| SUs          | metformin  | 1.6 (-5.5, 8.7)    | 2.6 (-6.9, 12.)    | 0.82037 | 1.9 (-2.0, 6.1)    |

| AST          |            |                    |                   |         |                   |
|--------------|------------|--------------------|-------------------|---------|-------------------|
| Intervention | Comparator | Direct estimate    | Indirect estimate | p value | Network estimate  |
| DPP4         | GLP1       | 3.8 (-4.9, 13.)    | -1.8 (-14., 11.)  | 0.46086 | 2.0 (-5.1, 9.)    |
| DPP4         | SGLT2i     | -8.1 (-21., 5.5)   | 2.1 (-6.8, 11.)   | 0.21128 | -0.91 (-8.6, 6.5) |
| GLP1         | SUs        | -0.29 (-6.9, 6.3)  | 1.9 (-8.2, 11.)   | 0.68363 | 0.29 (-4.4, 5.1)  |
| GLP1         | metformin  | -1.4 (-7.9, 5.2)   | -0.91 (-9.6, 7.3) | 0.92133 | -1.5 (-5.9, 2.9)  |
| SGLT2i       | SUs        | 2.5 (-3.2, 8.2)    | 2.9 (-3.7, 9.4)   | 0.91665 | 3.2 (-0.85, 7.5)  |
| SGLT2i       | TZD        | -0.96 (-4.8, 3.5)  | 1.4 (-5.4, 8.2)   | 0.53882 | -0.52 (-3.4, 2.9) |
| SUs          | TZD        | -5.8 (-11., -0.23) | -1.8 (-8.1, 4.7)  | 0.27345 | -3.8 (-7.7, 0.63) |
| DPP4         | control    | 7.2 (-13., 27.)    | 0.52 (-7.6, 8.5)  | 0.5514  | 1.4 (-6.1, 8.9)   |
| GLP1         | control    | 2.1 (-6.2, 10.)    | -1.6 (-6.9, 4.)   | 0.44786 | -0.67 (-4.9, 4.1) |
| SGLT2i       | control    | 2.5 (-1.5, 6.8)    | 2.3 (-2.9, 8.5)   | 0.95638 | 2.3 (-0.56, 5.6)  |
| TZD          | control    | 2.5 (-1.1, 6.5)    | 4.0 (-1.3, 9.2)   | 0.59026 | 2.8 (-0.26, 5.9)  |
| control      | metformin  | 0.44 (-2.5, 2.6)   | -1.1 (-6.5, 3.2)  | 0.51064 | -0.81 (-4.0, 1.9) |

|        |           |                   |                  |         |                  |
|--------|-----------|-------------------|------------------|---------|------------------|
| SGLT2i | metformin | -7.3 (-33., 18.)  | 1.6 (-2.2, 5.6)  | 0.48961 | 1.5 (-2.3, 5.3)  |
| SUs    | metformin | -1.1 (-7.7, 5.5)  | -2.9 (-10., 4.3) | 0.65565 | -1.8 (-6.0, 2.3) |
| TZD    | metformin | -4.8 (-10., 0.61) | 4.7 (1.2, 7.5)   | 0.00831 | 2. (-2.0, 5.5)   |

#### ALT

| Intervention | Comparator | Direct estimate  | Indirect estimate | p value | Network estimate  |
|--------------|------------|------------------|-------------------|---------|-------------------|
| DPP4         | SGLT2i     | -8.6 (-45., 29.) | -0.88 (-19., 16.) | 0.71477 | -2.5 (-19., 13.)  |
| GLP1         | SUs        | 5.9 (-9.5, 21.)  | 5.3 (-16., 25.)   | 0.95615 | 5.7 (-5.6, 17.)   |
| GLP1         | metformin  | 1.0 (-14., 16.)  | 3.5 (-13., 19.)   | 0.81337 | 2.3 (-7.7, 12.)   |
| SGLT2i       | SUs        | 6.9 (-8.6, 22.)  | 10. (-5.9, 27.)   | 0.77374 | 8.4 (-1.2, 18.)   |
| SGLT2i       | TZD        | -6.8 (-15., 1.5) | -1.7 (-14., 10.)  | 0.48419 | -5.2 (-12., 1.0)  |
| SUs          | TZD        | -13. (-29., 2.3) | -15. (-32., 0.88) | 0.87531 | -14. (-24., -4.1) |
| DPP4         | control    | -2.9 (-32., 26.) | 2.5 (-16., 21.)   | 0.75765 | 0.67 (-15., 16.)  |
| GLP1         | control    | 3.4 (-12., 19.)  | -1.5 (-14., 11.)  | 0.61276 | 0.48 (-9.2, 10.)  |
| SGLT2i       | control    | 3.7 (-5.3, 13.)  | 2.8 (-6.6, 13.)   | 0.89073 | 3.2 (-2.9, 9.7)   |
| TZD          | control    | 8.2 (1.5, 16.)   | 11. (0.43, 22.)   | 0.6682  | 8.4 (2.5, 15.)    |
| control      | metformin  | 4.2 (-2.1, 9.7)  | 0.33 (-8.2, 10.)  | 0.47796 | 1.8 (-4.5, 8.1)   |
| SGLT2i       | metformin  | 9.7 (-4.5, 24.)  | 3.3 (-5.3, 12.)   | 0.44491 | 5. (-2.2, 13.)    |
| SUs          | metformin  | -5. (-20., 10.)  | -1.9 (-17., 14.)  | 0.75935 | -3.4 (-13., 6.5)  |
| TZD          | metformin  | -4.3 (-15., 6.6) | 15. (8.6, 23.)    | 0.00557 | 10. (3., 18.)     |



# Appendix 7

## The trajectory map, density map and convergent diagnostic diagram

### Fig.s1 HOMO-IR

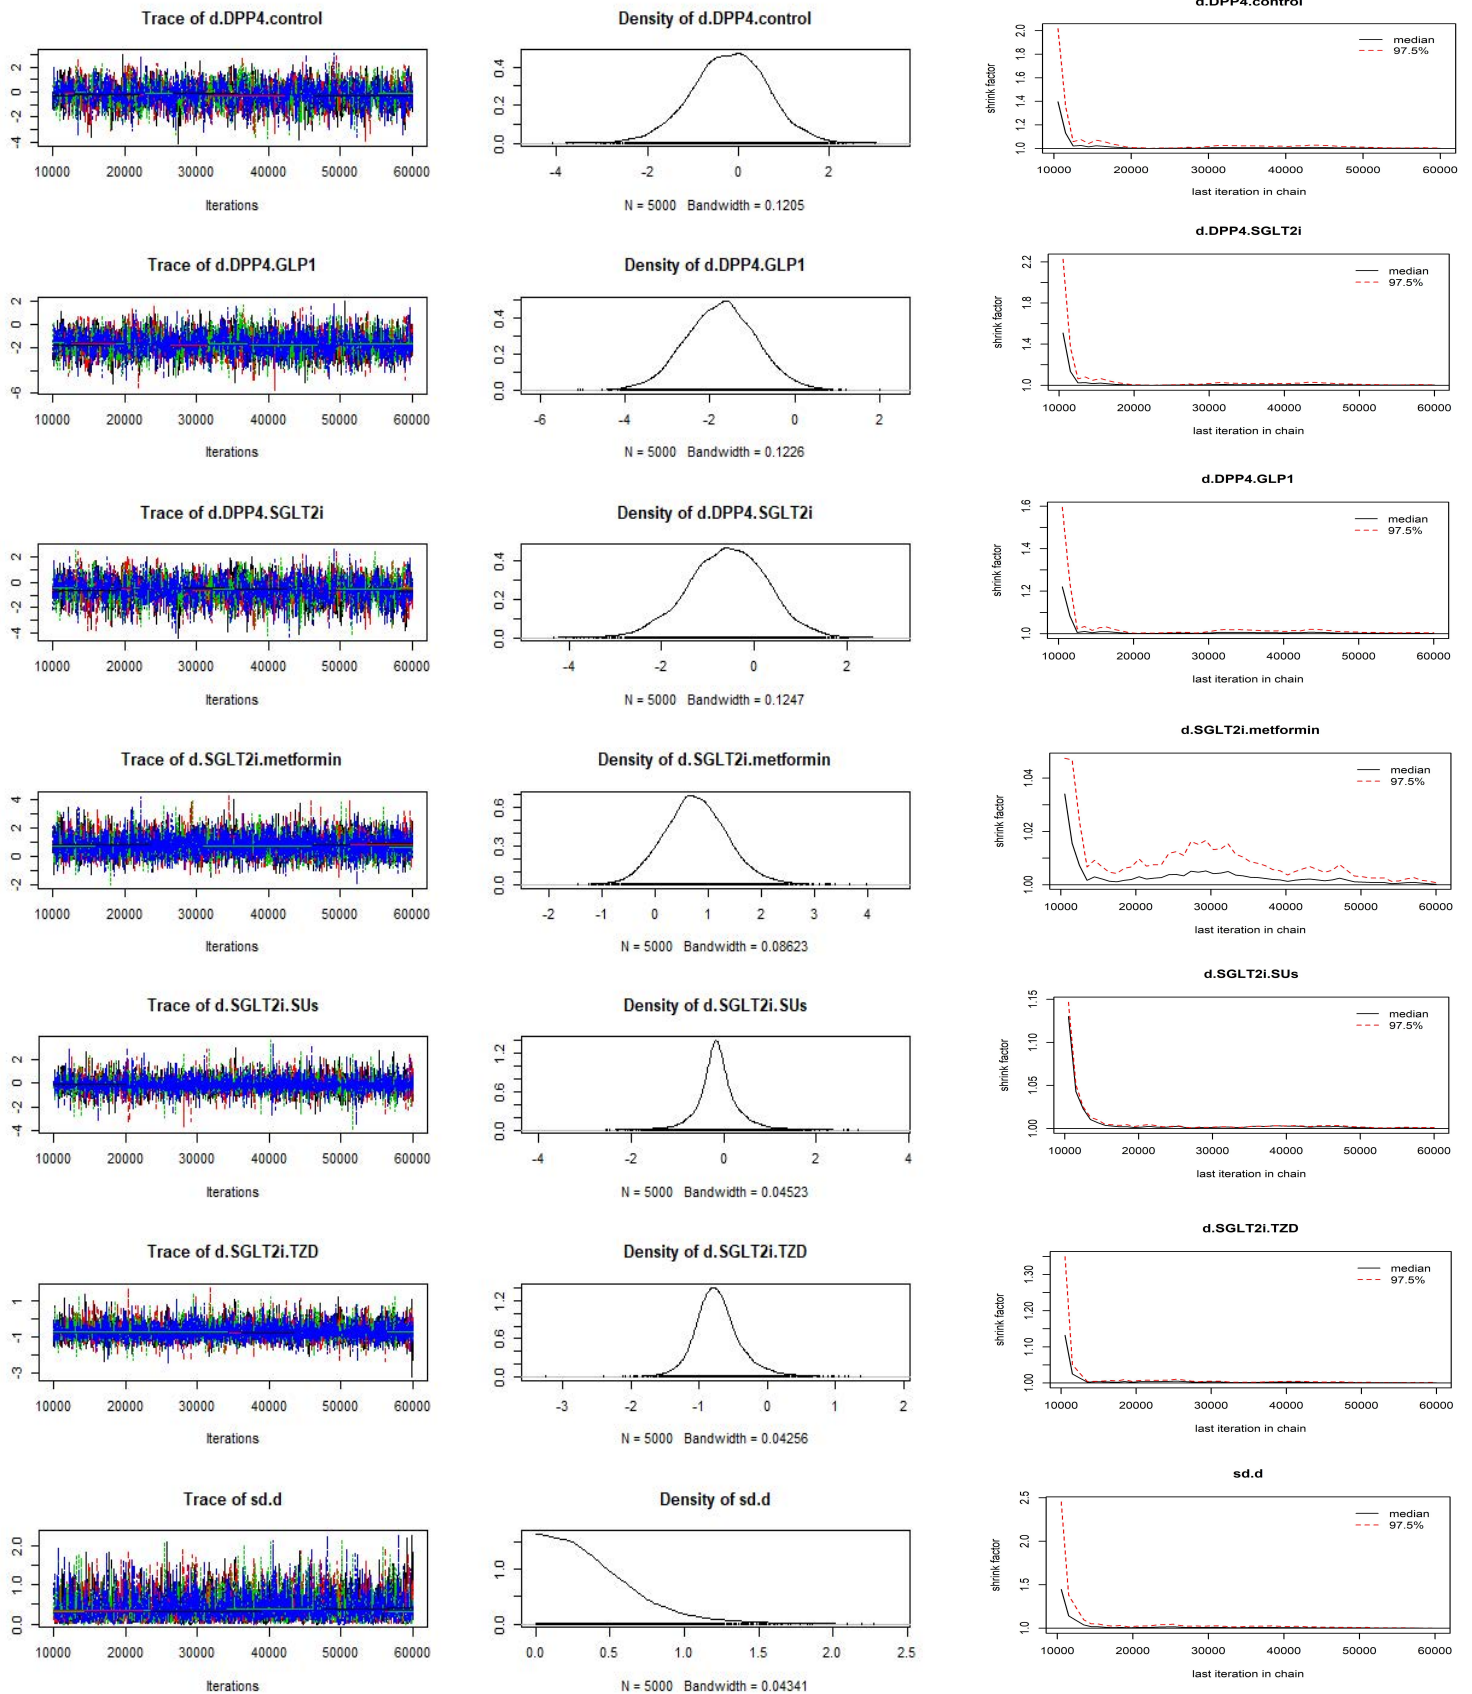



Fig.s2 VAT

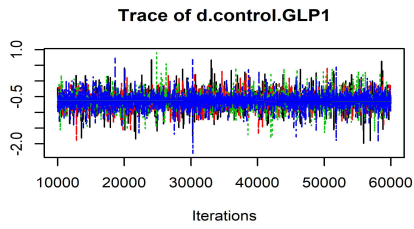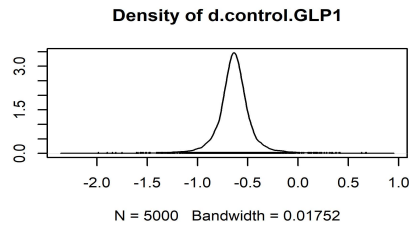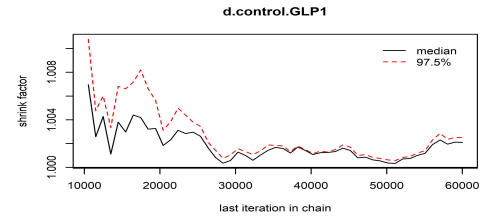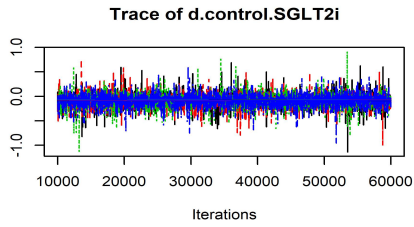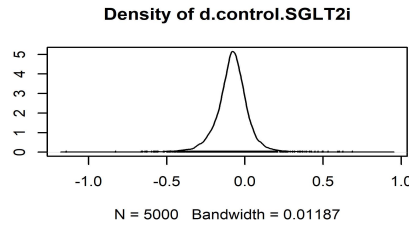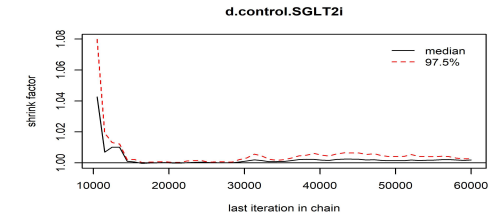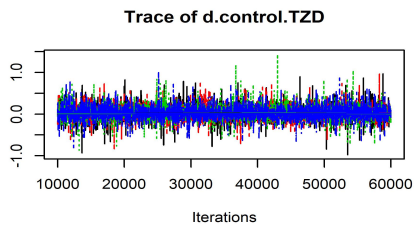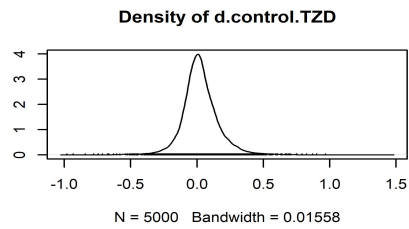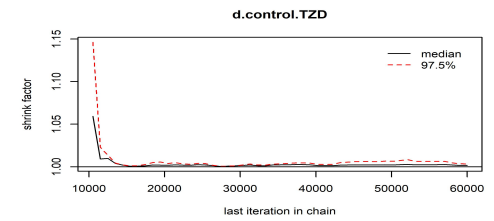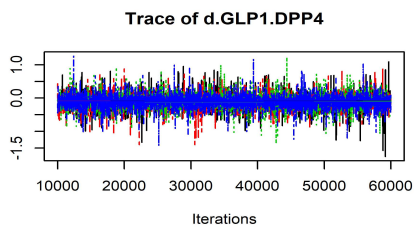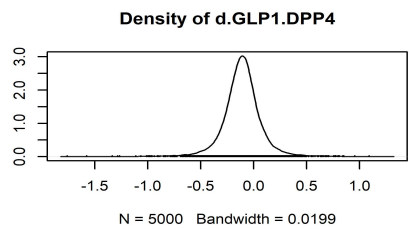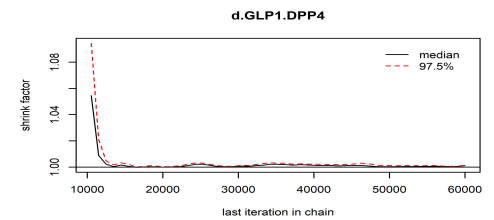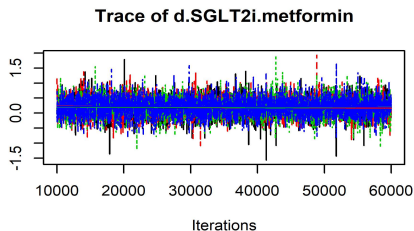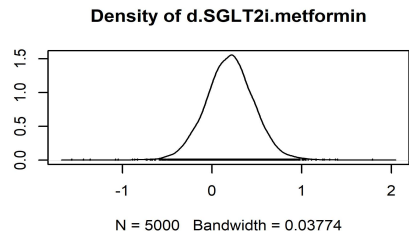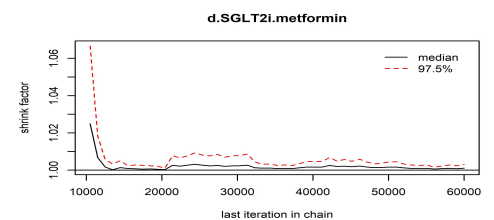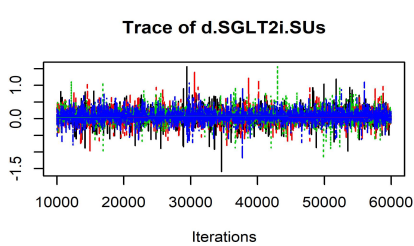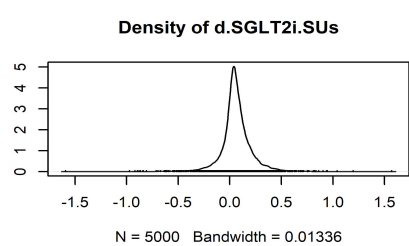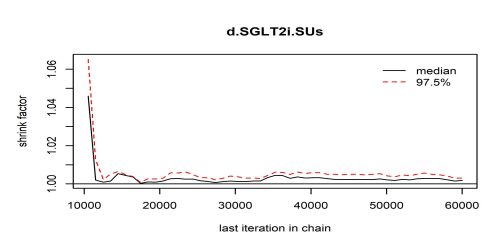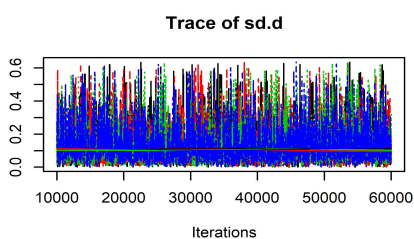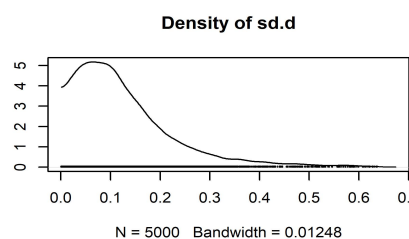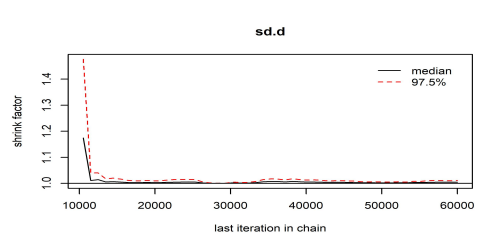

# Fig.s3 SAT

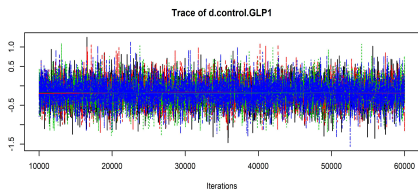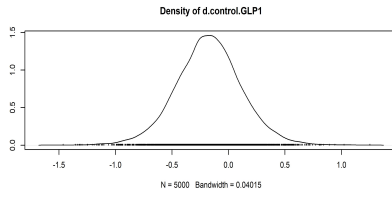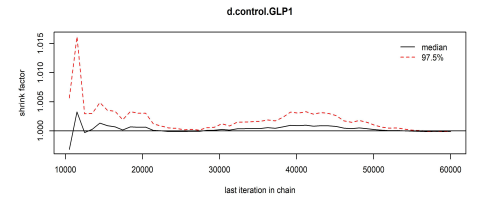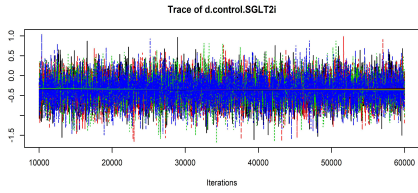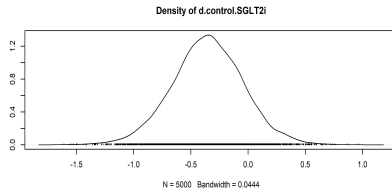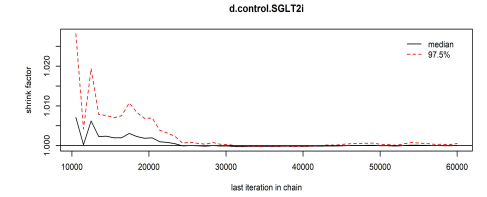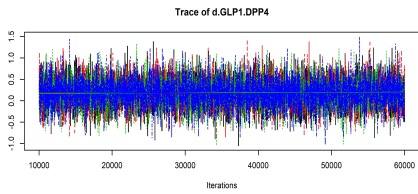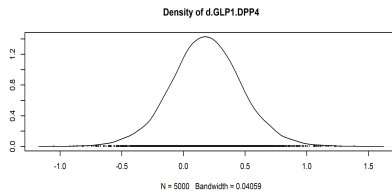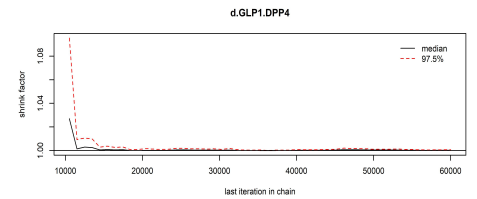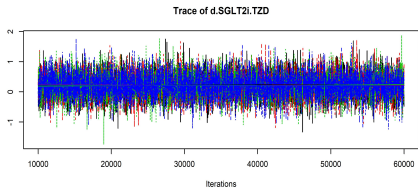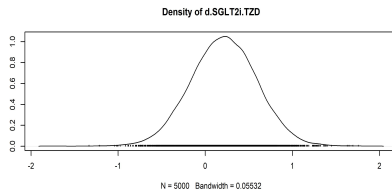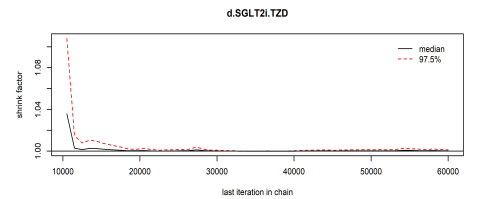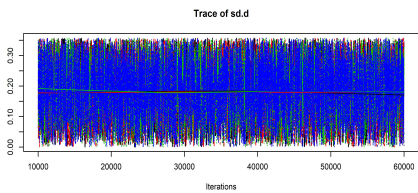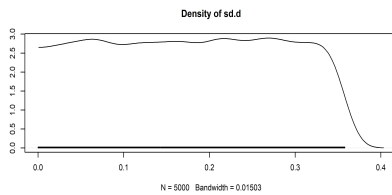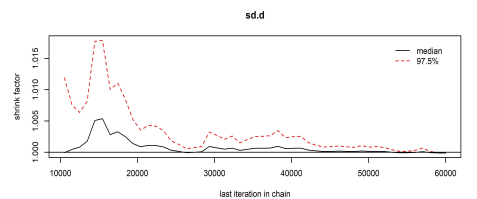

# Fig.s4 BMI

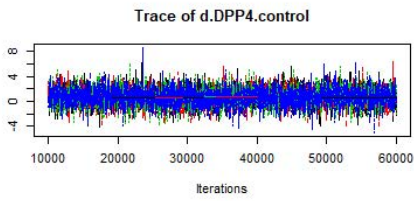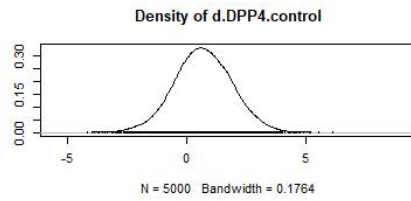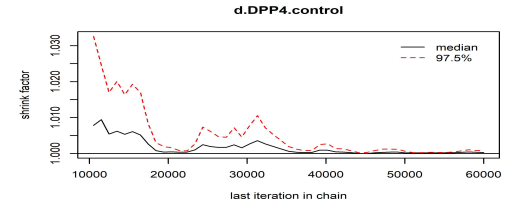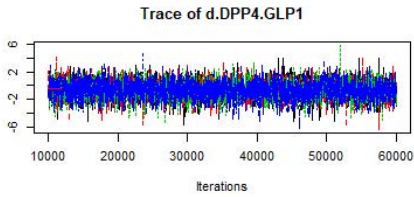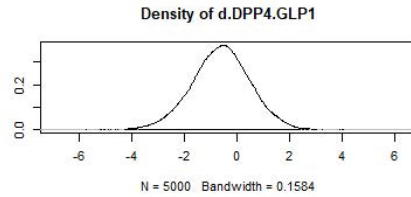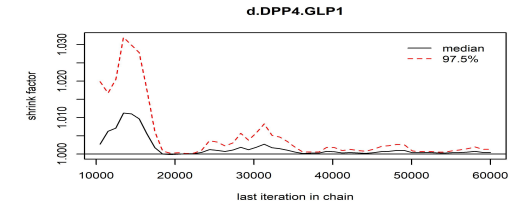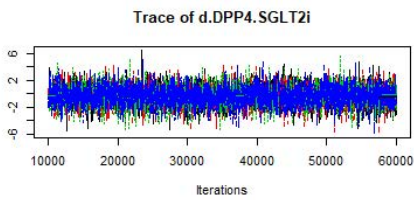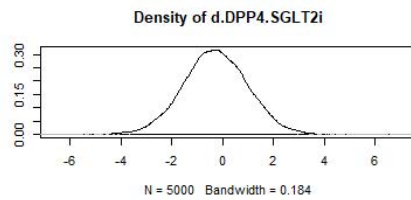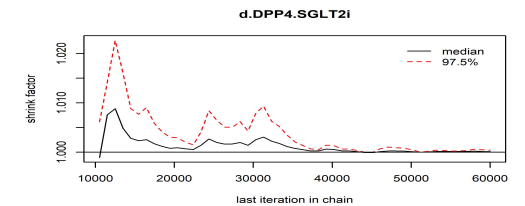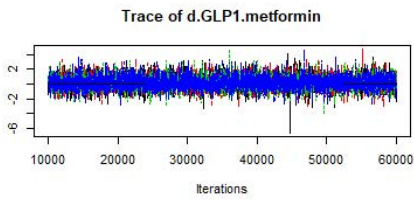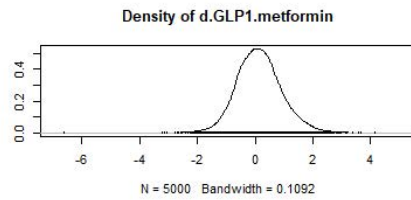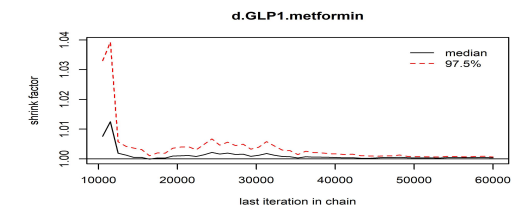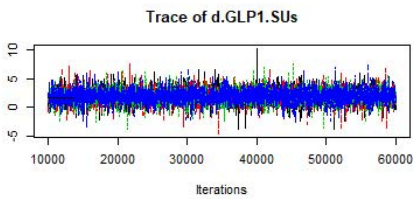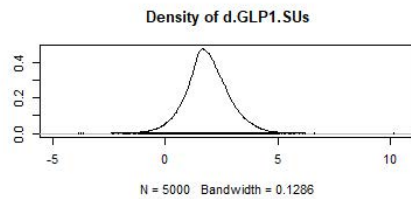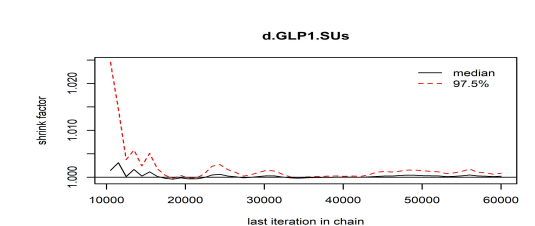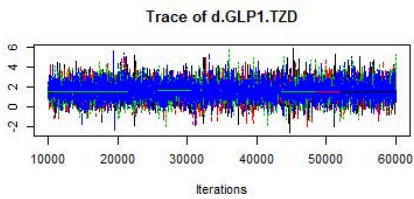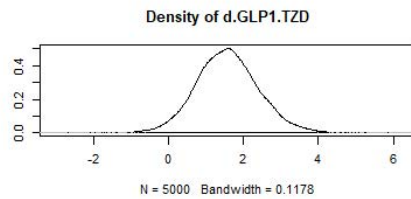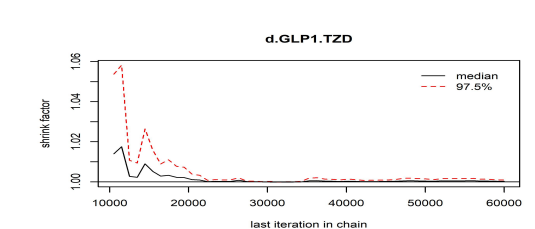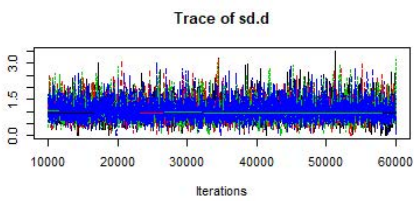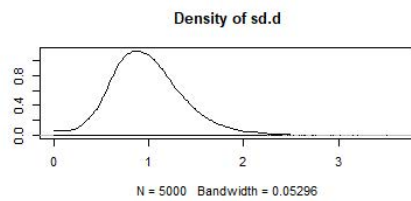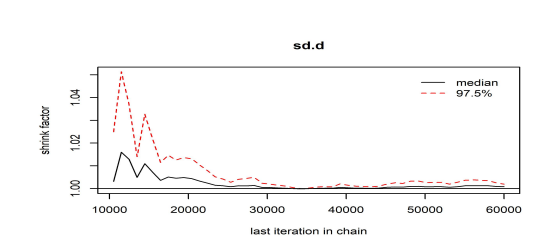

# Fig.s5 Weight

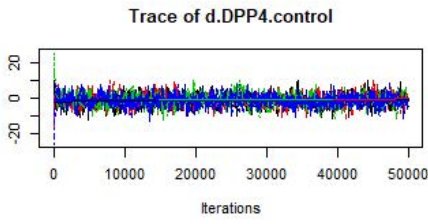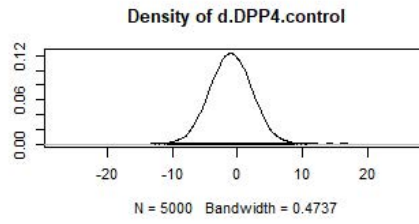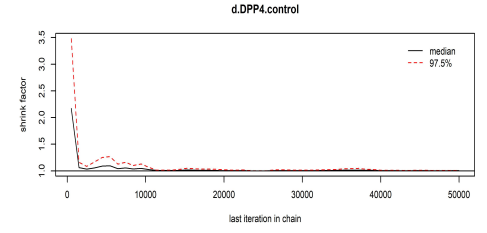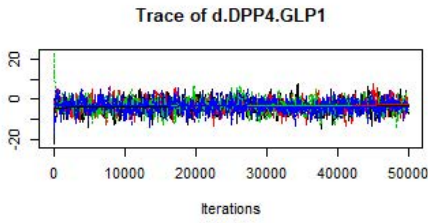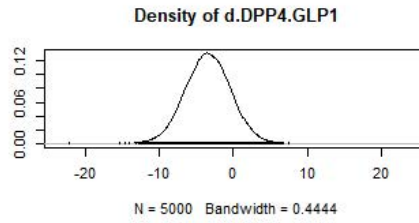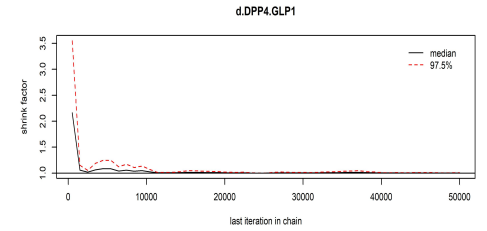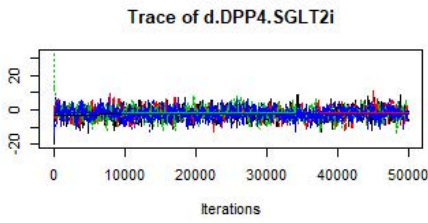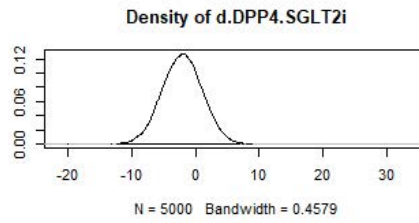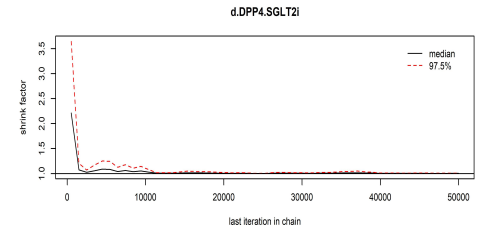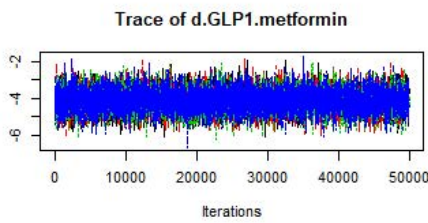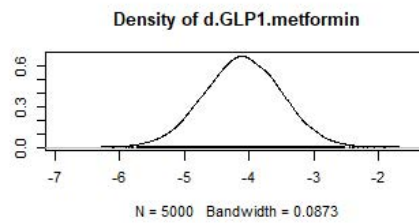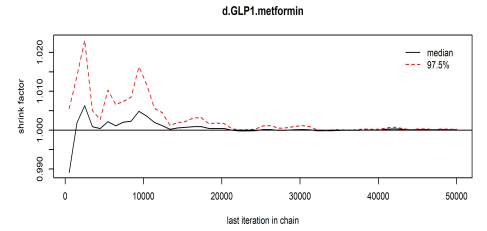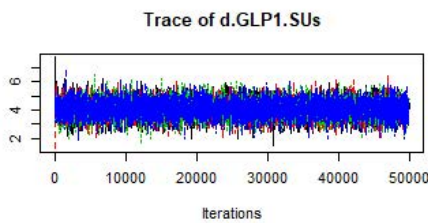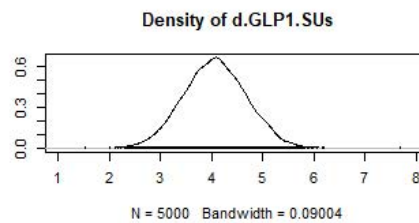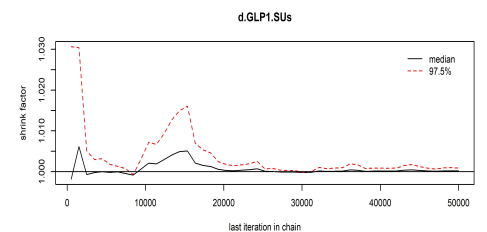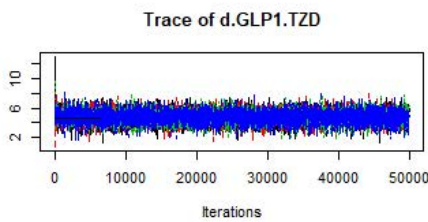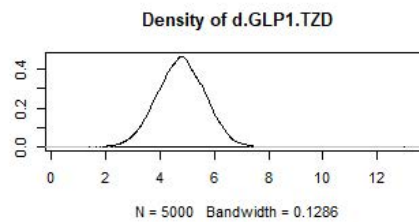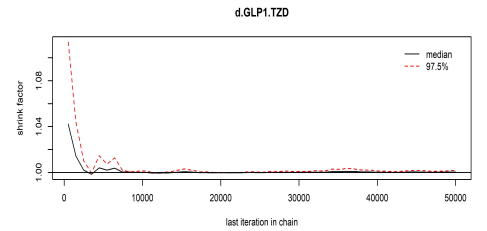



# Fig.s6 Leptin

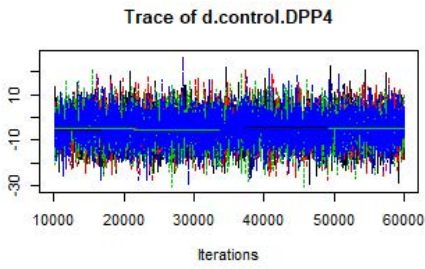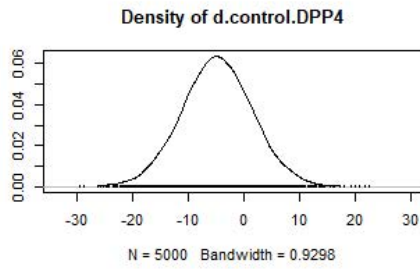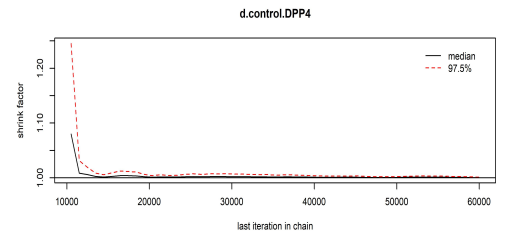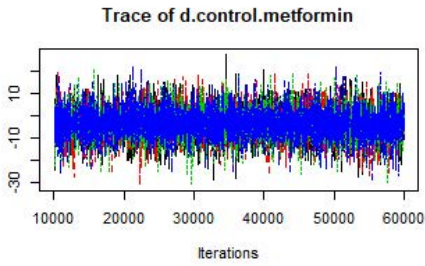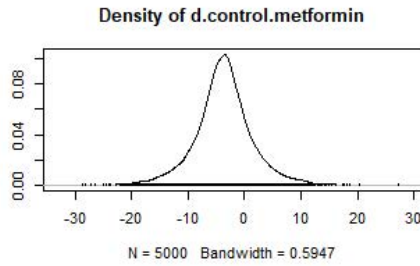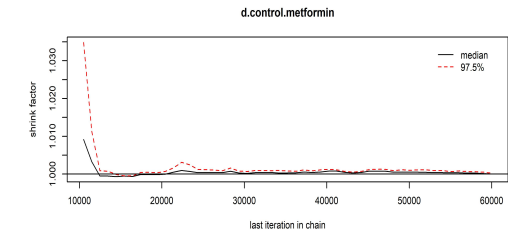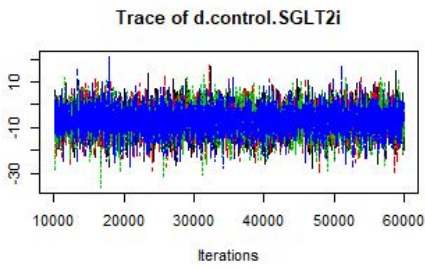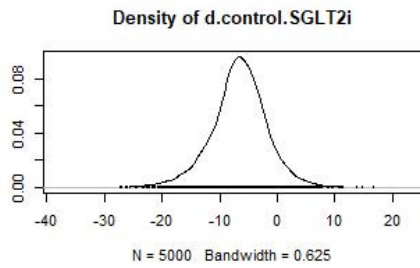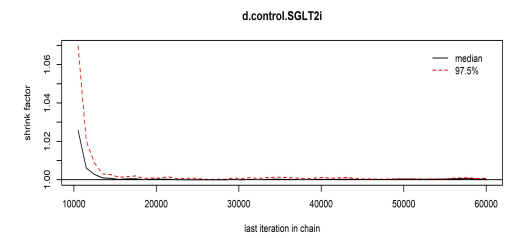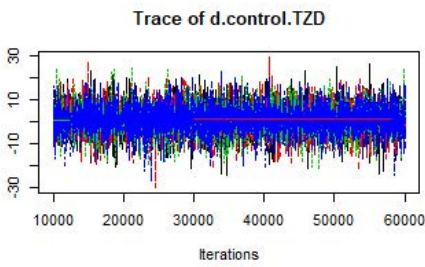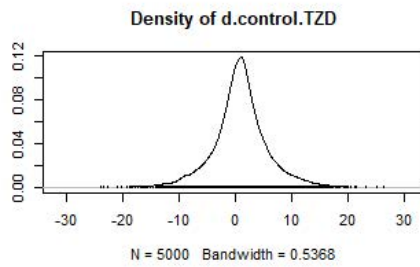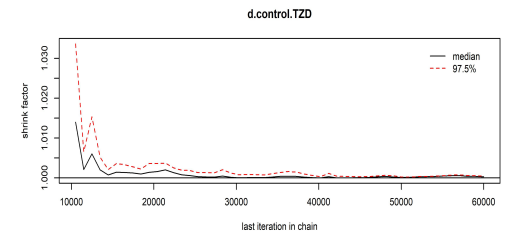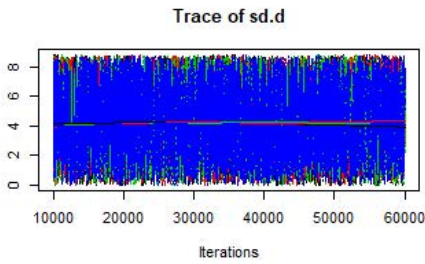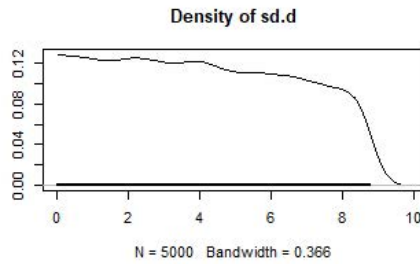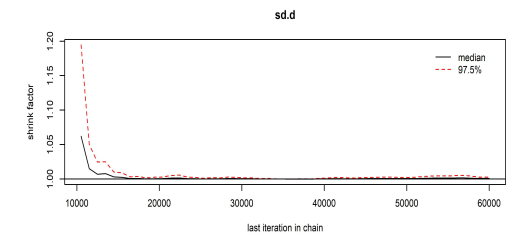

# Fig.s7 Adiponectin

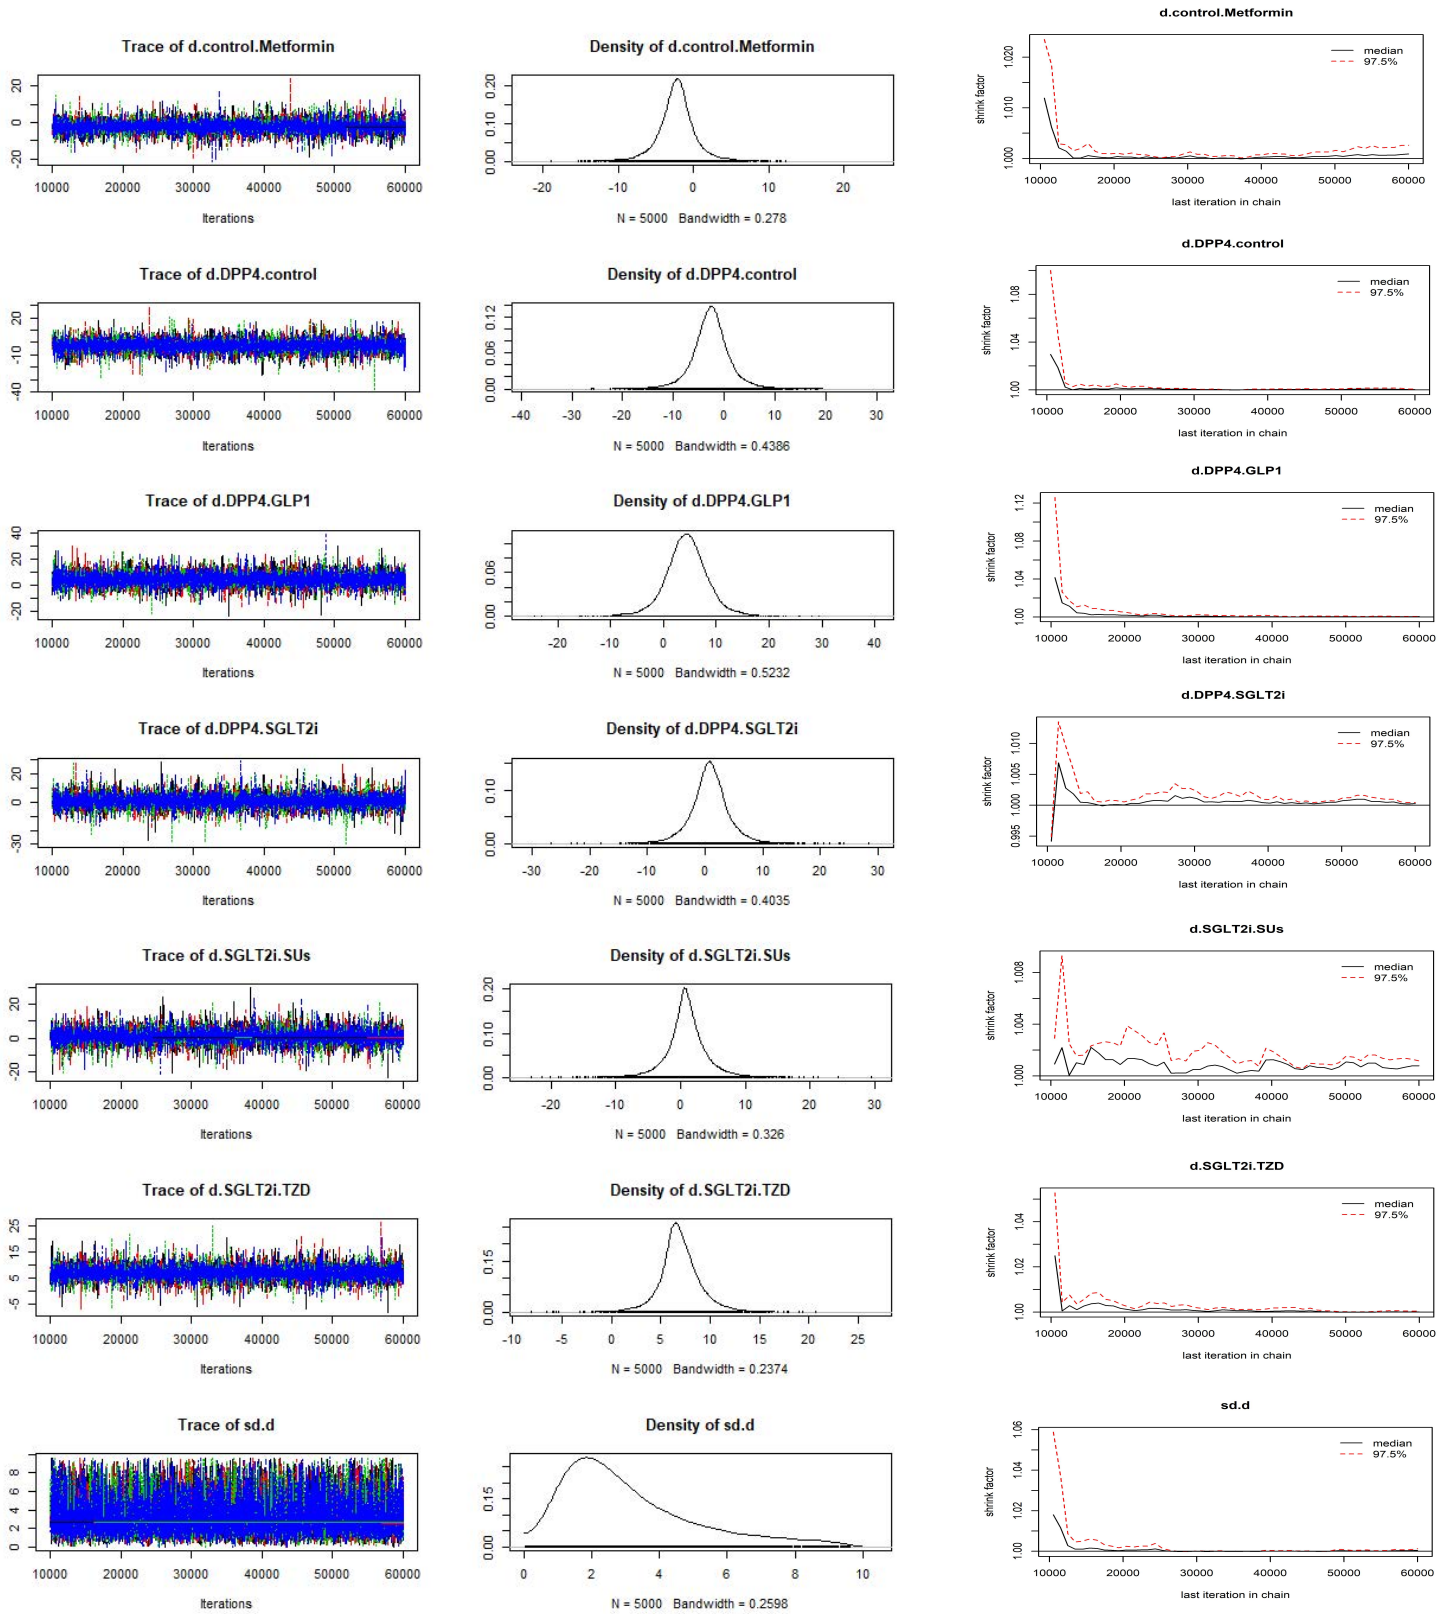

Fig.s8 FBS

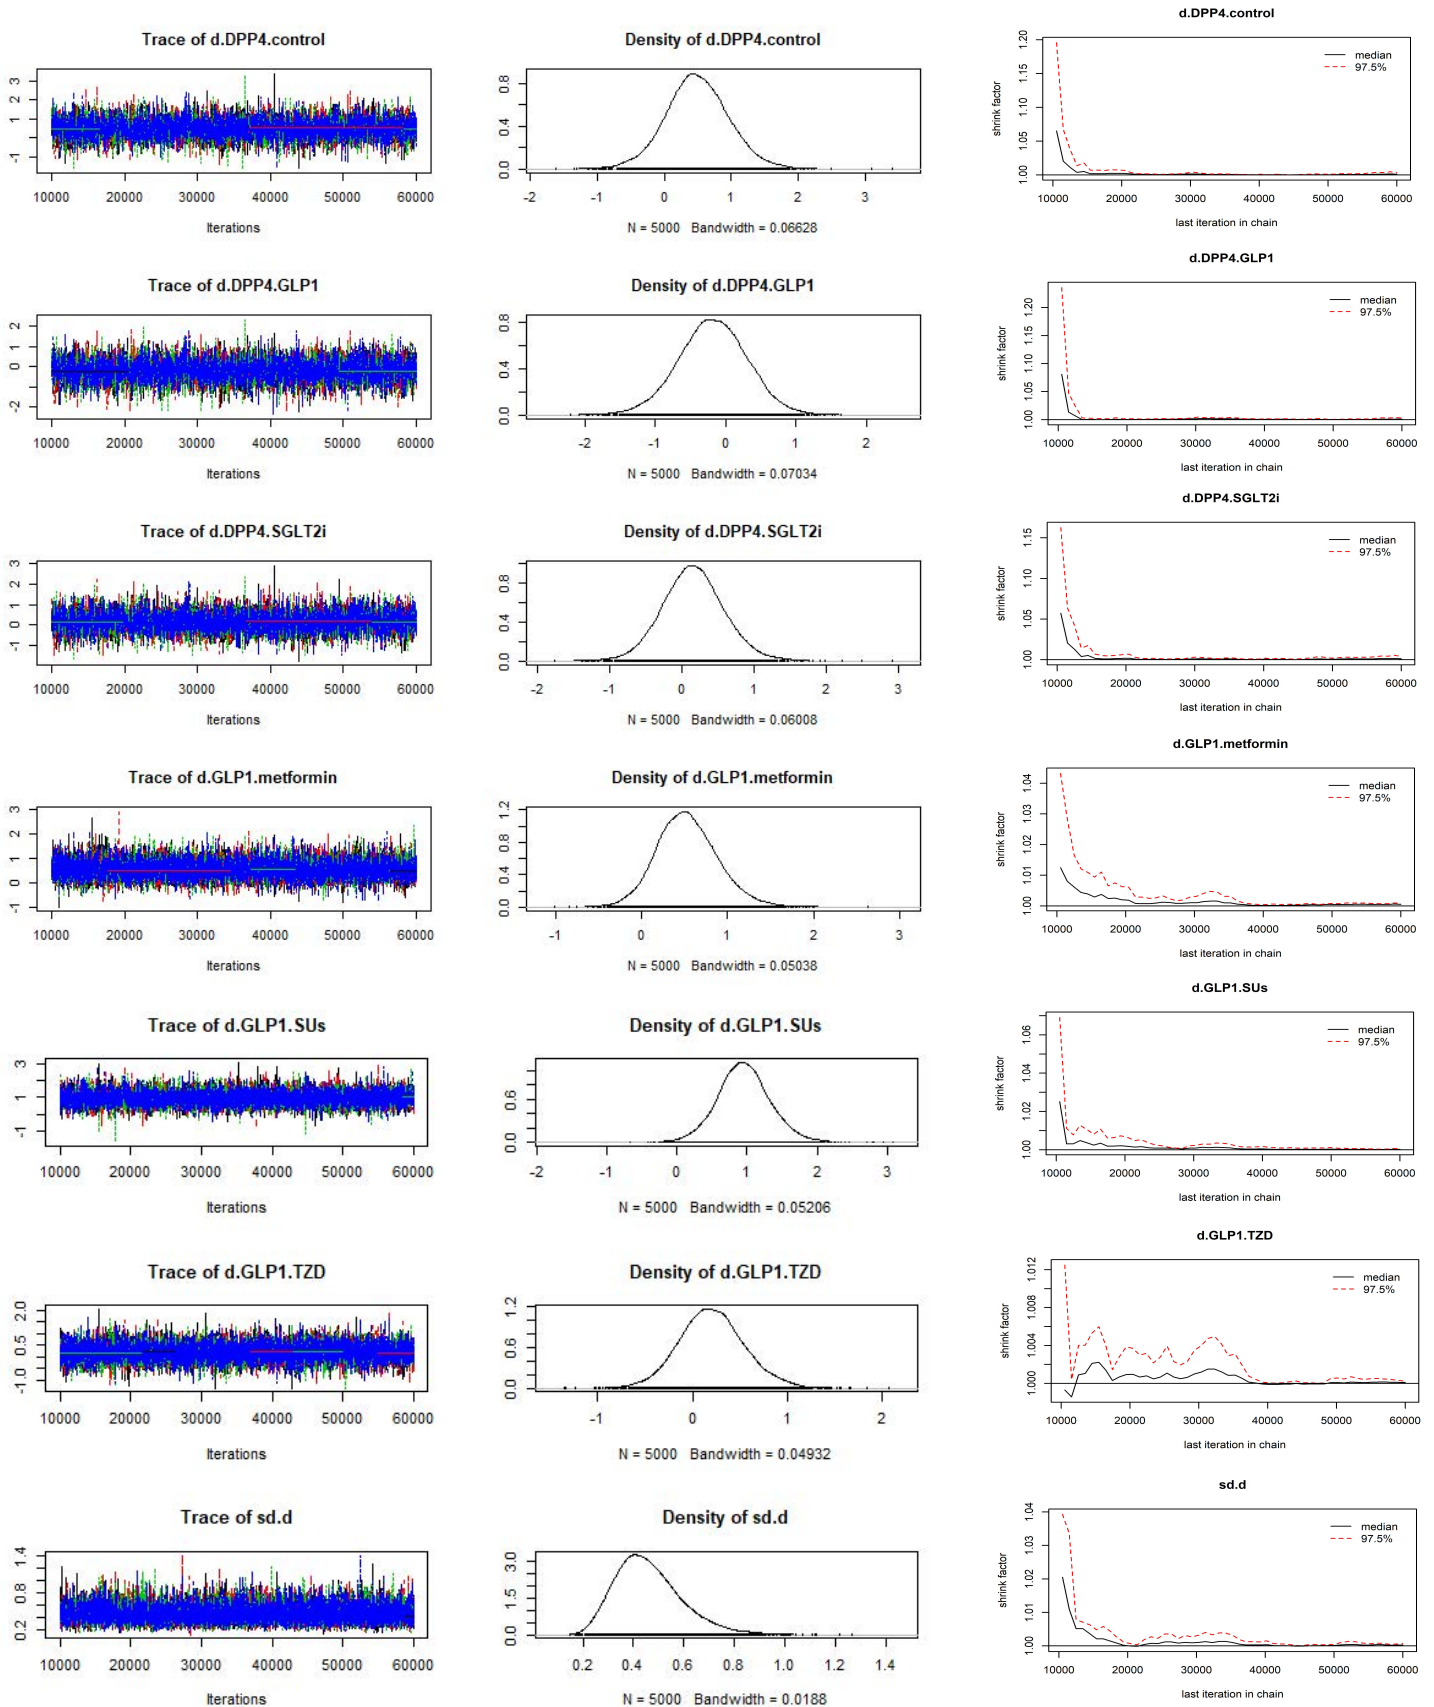



# Fig.s9 TG

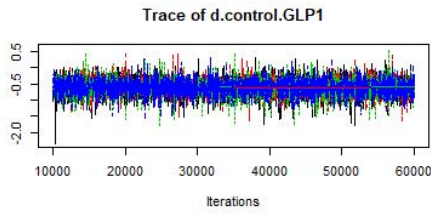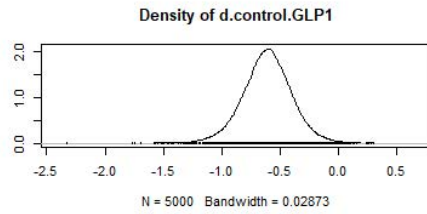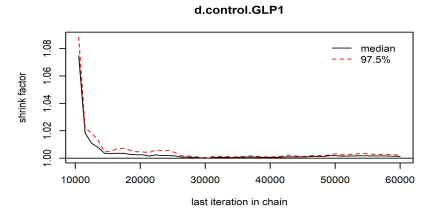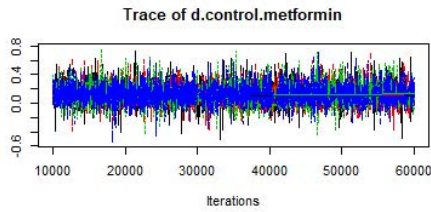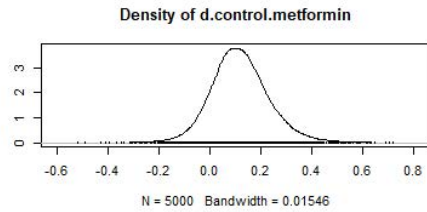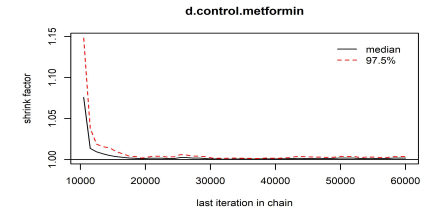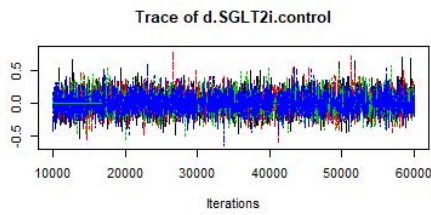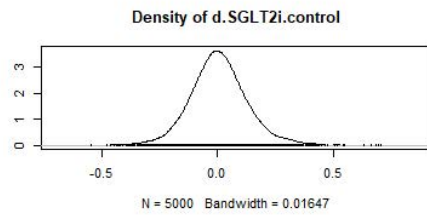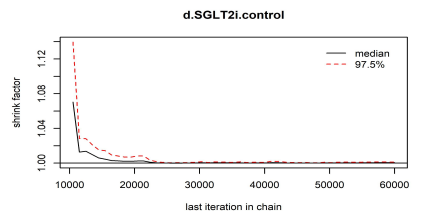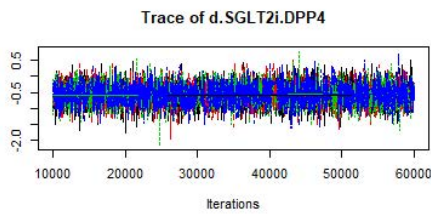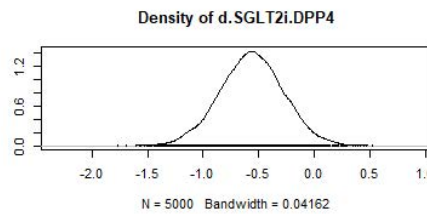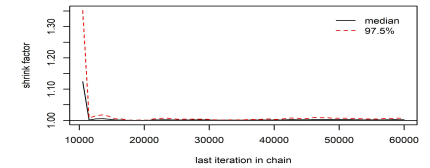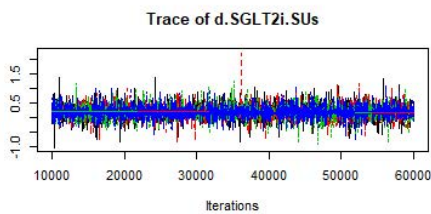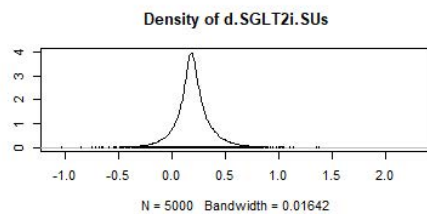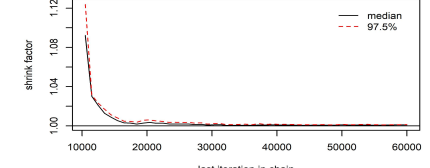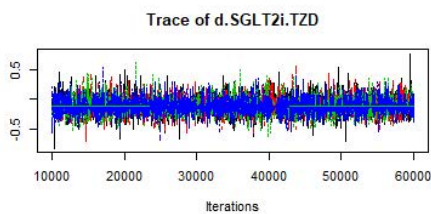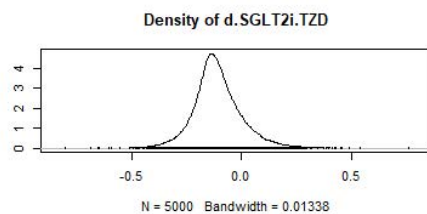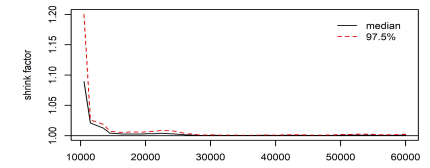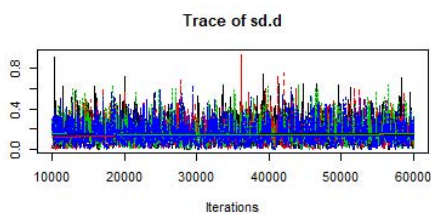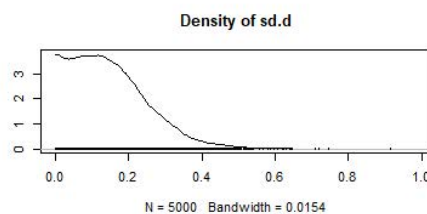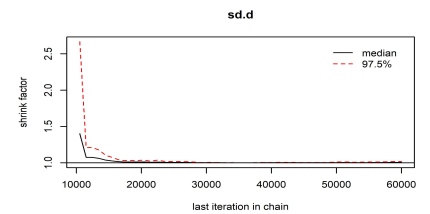



# Fig.s10 TC

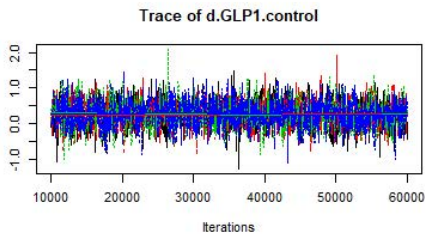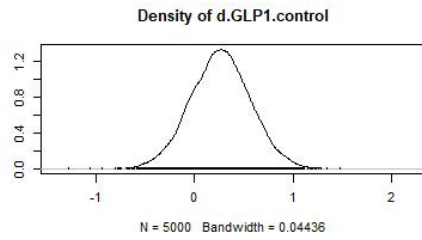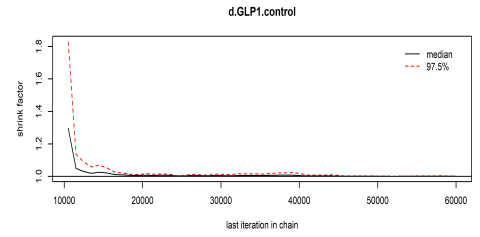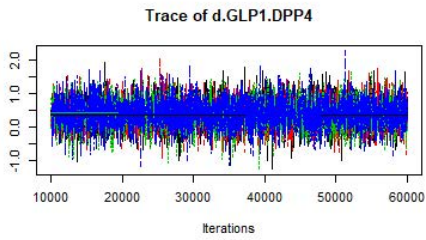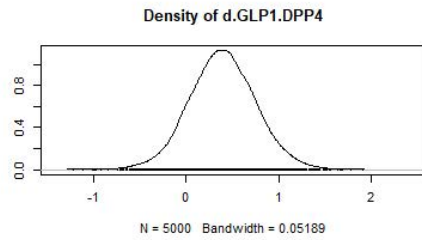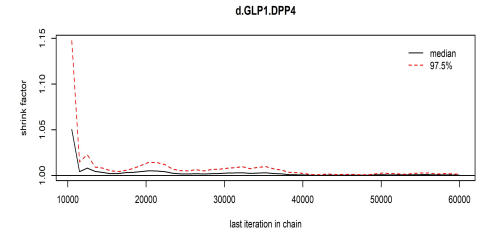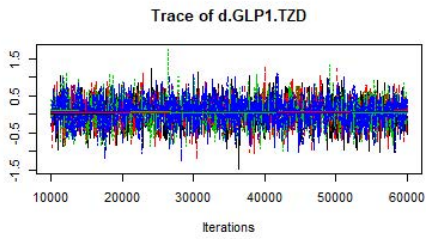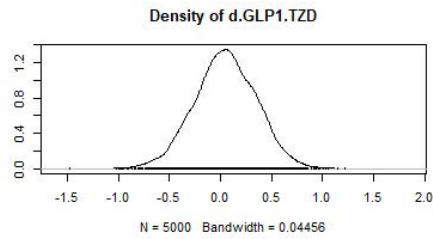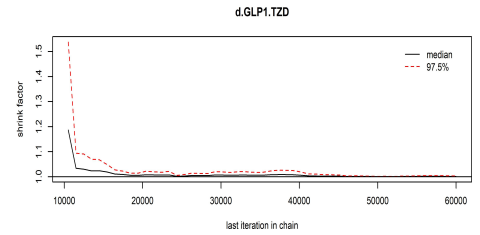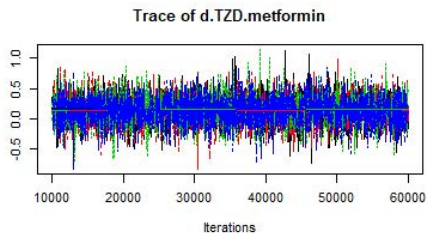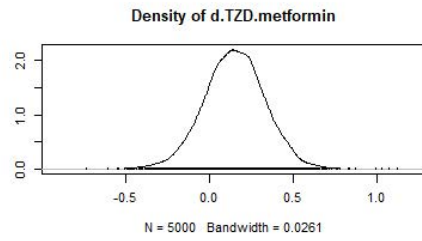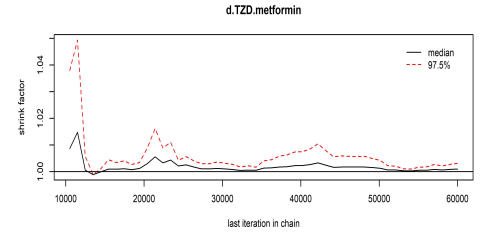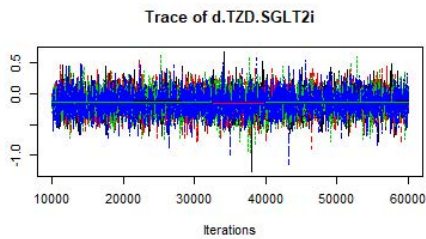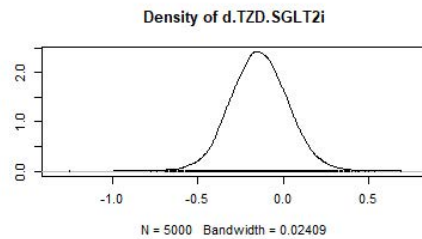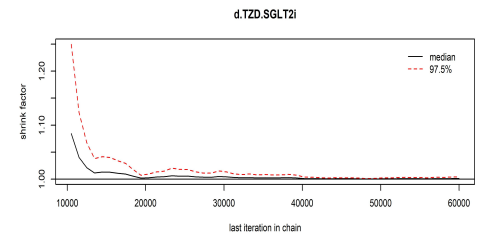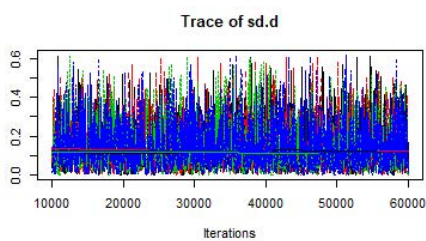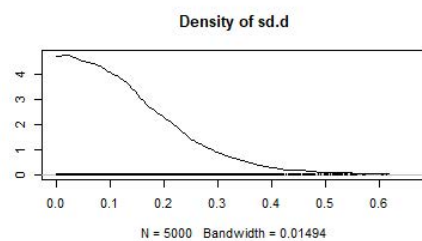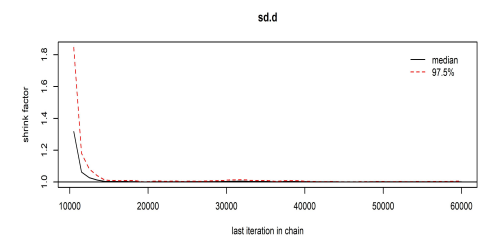

# Fig.s11 HDL

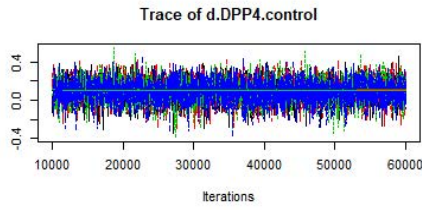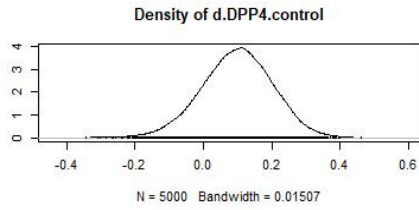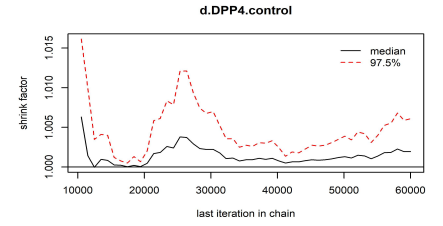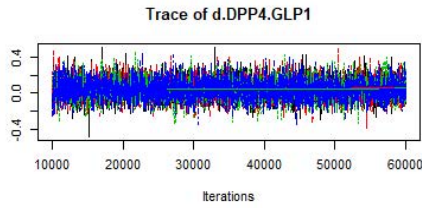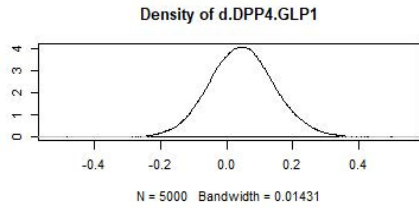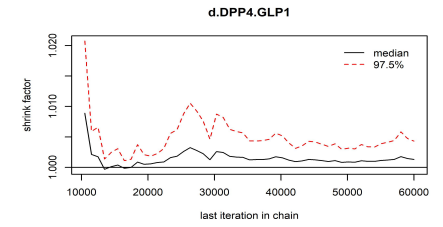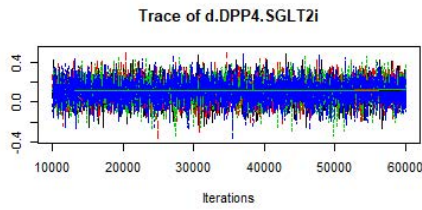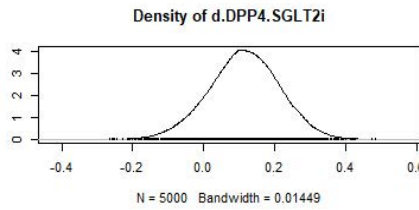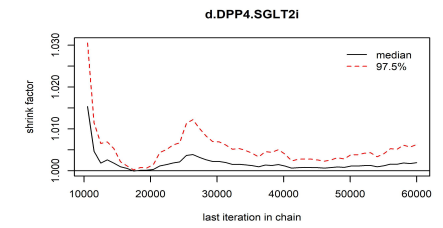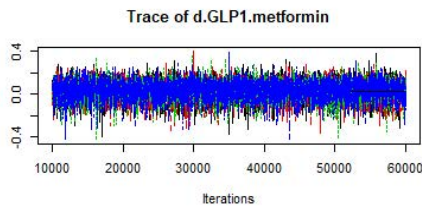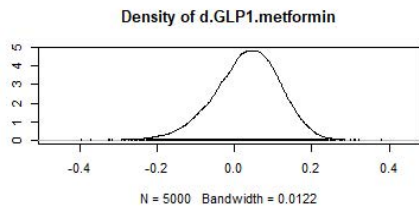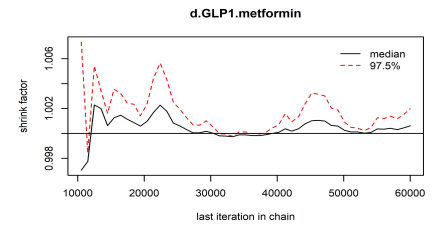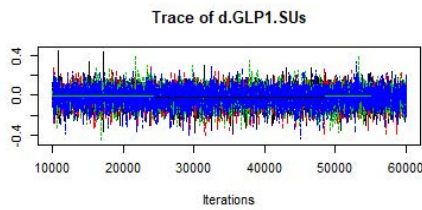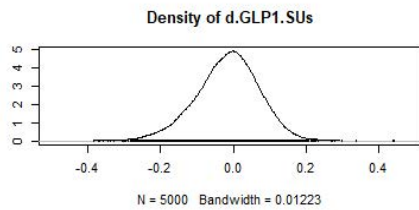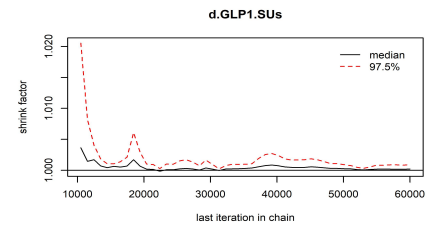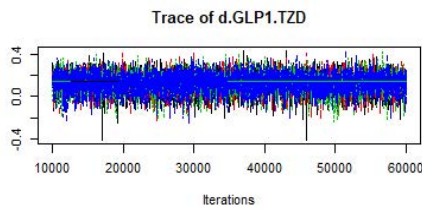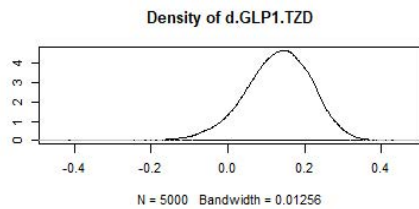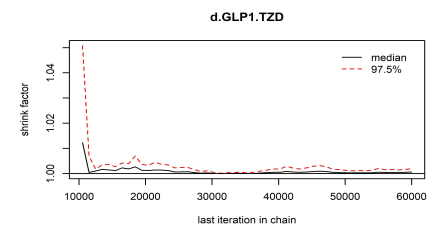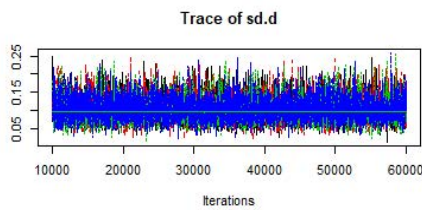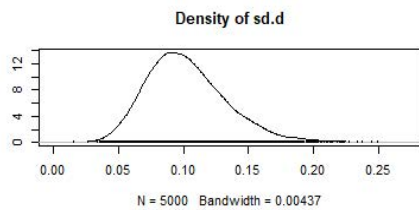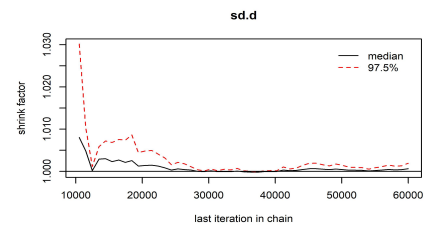

# Fig.s12 LDL

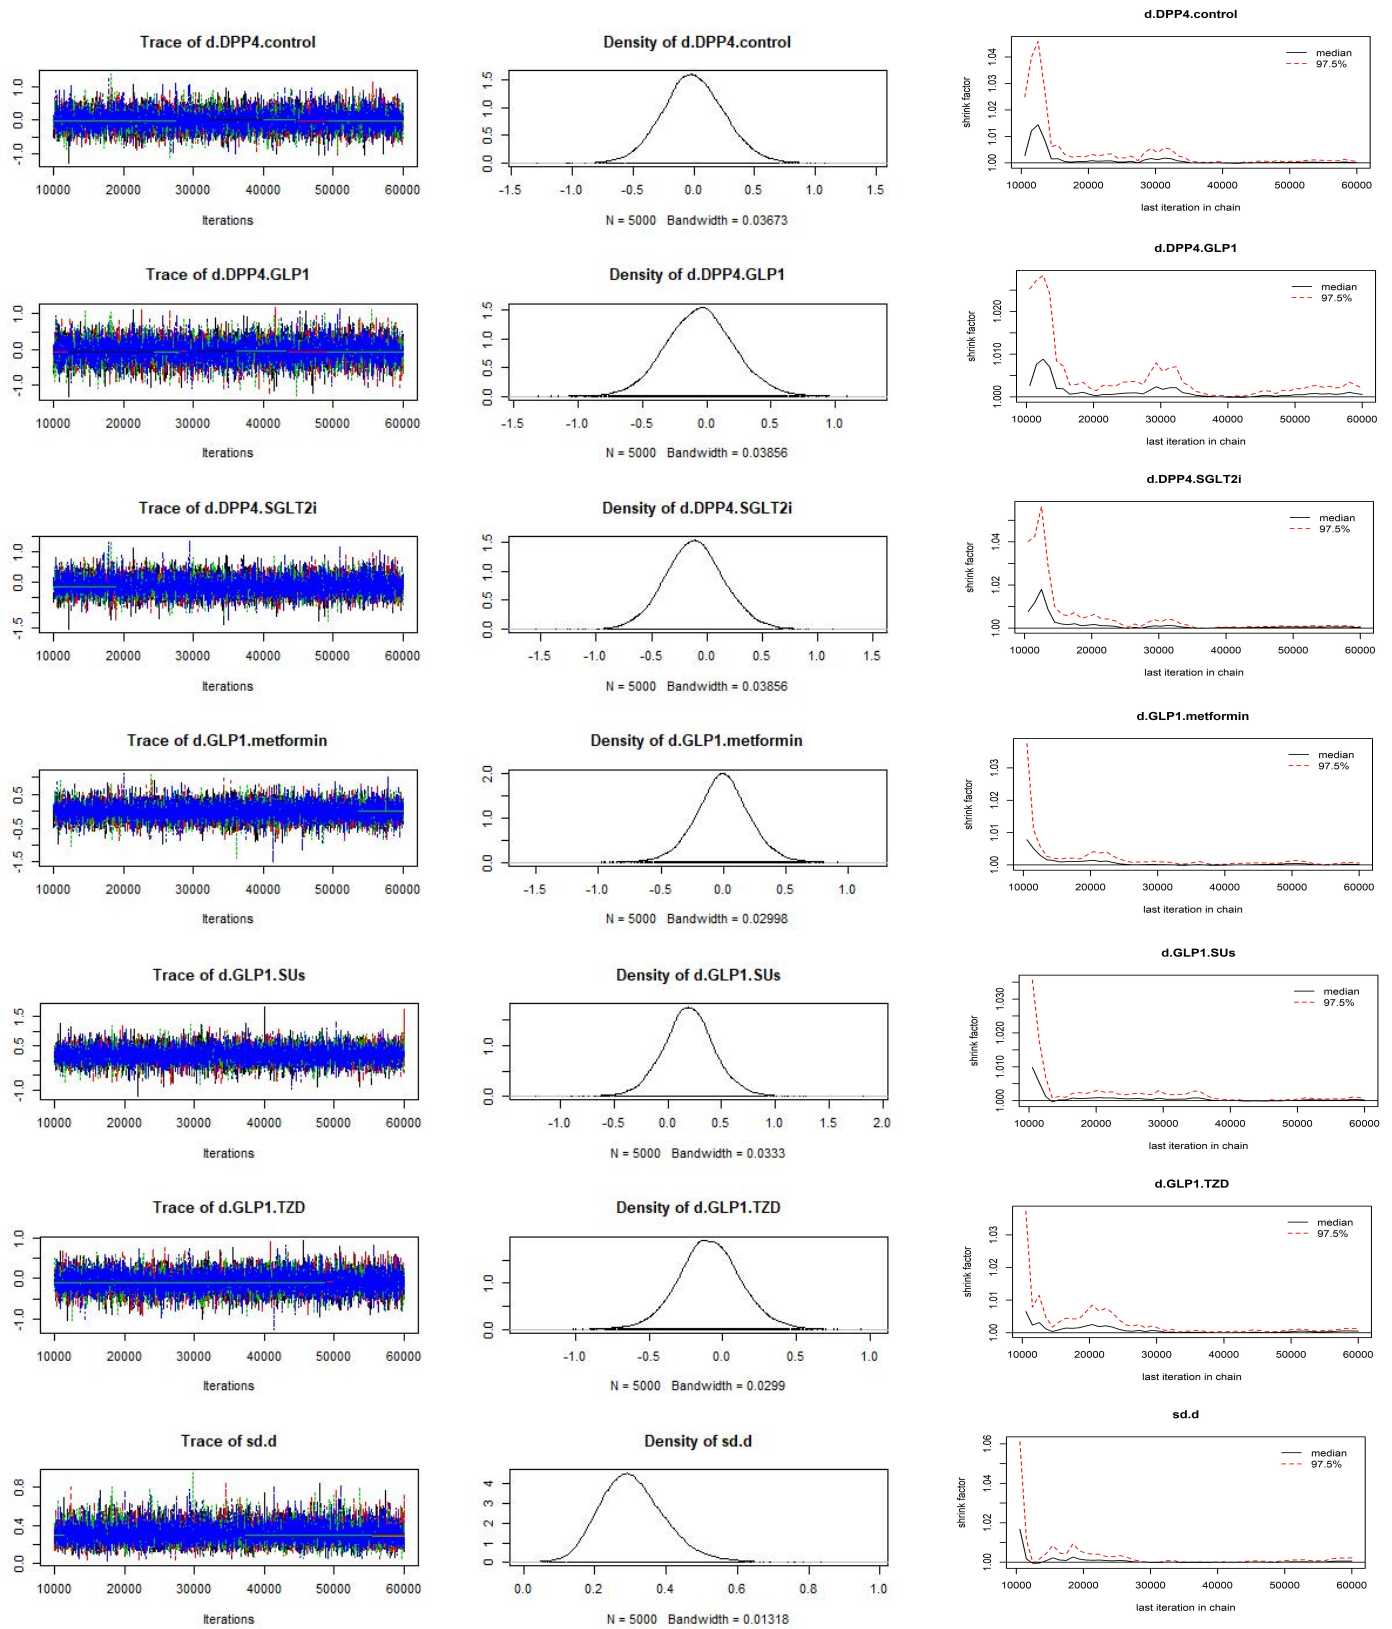



# Fig.s13 SBP

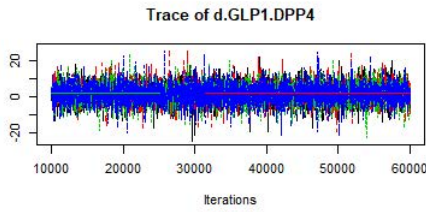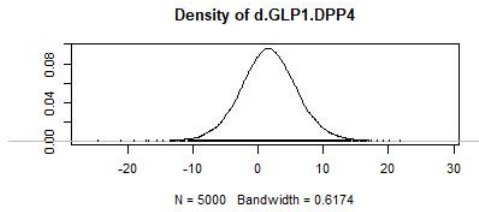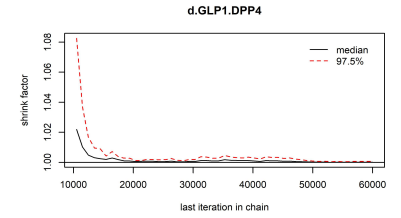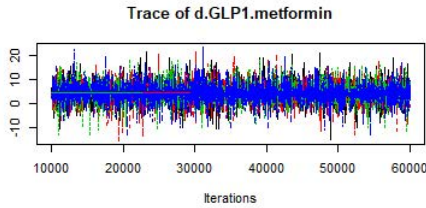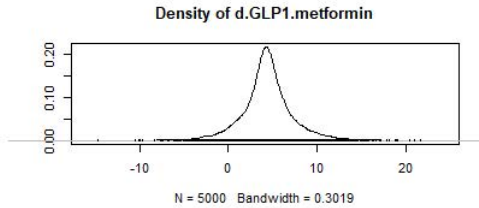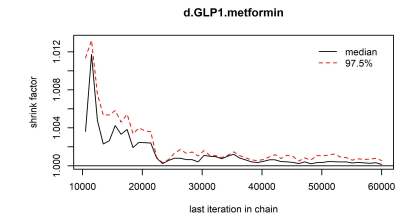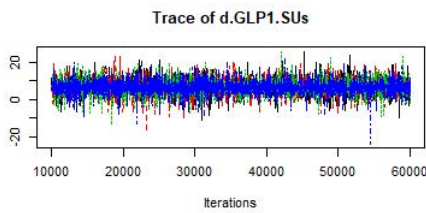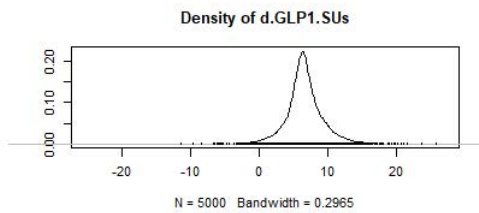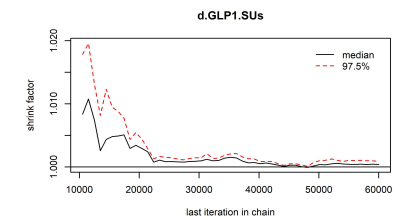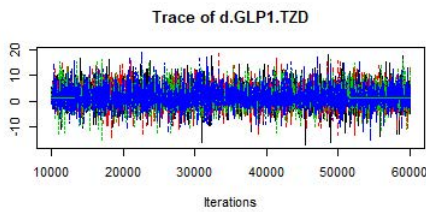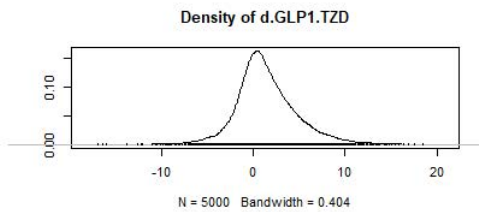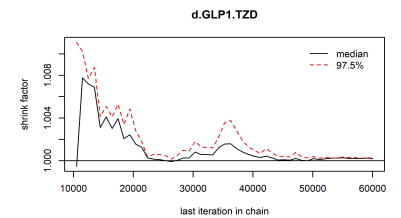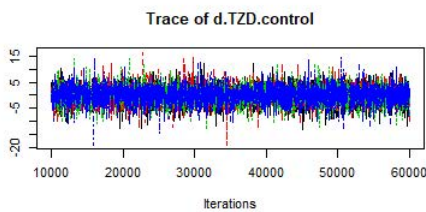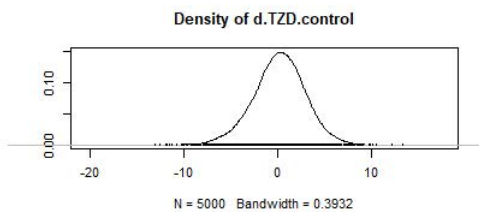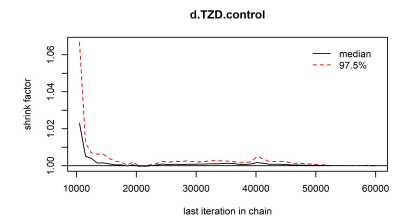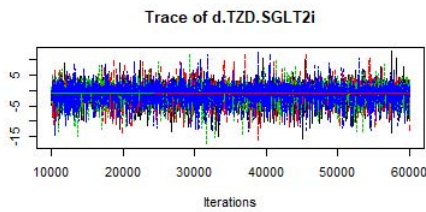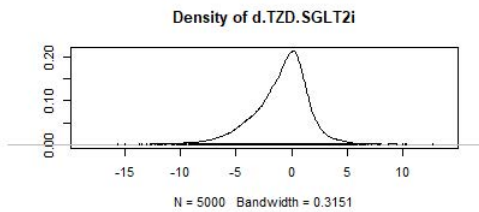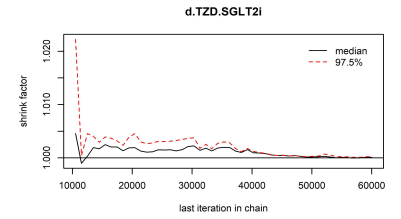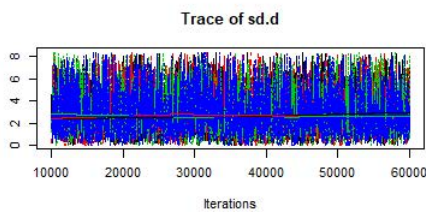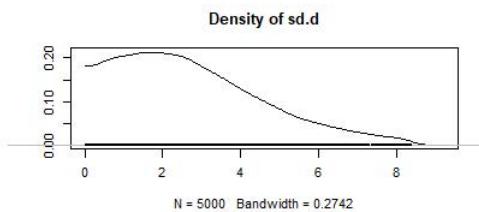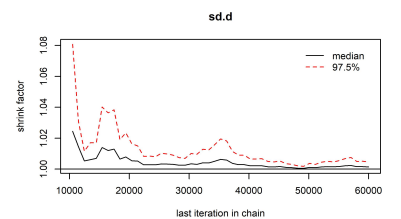

# Fig.s14 RBP

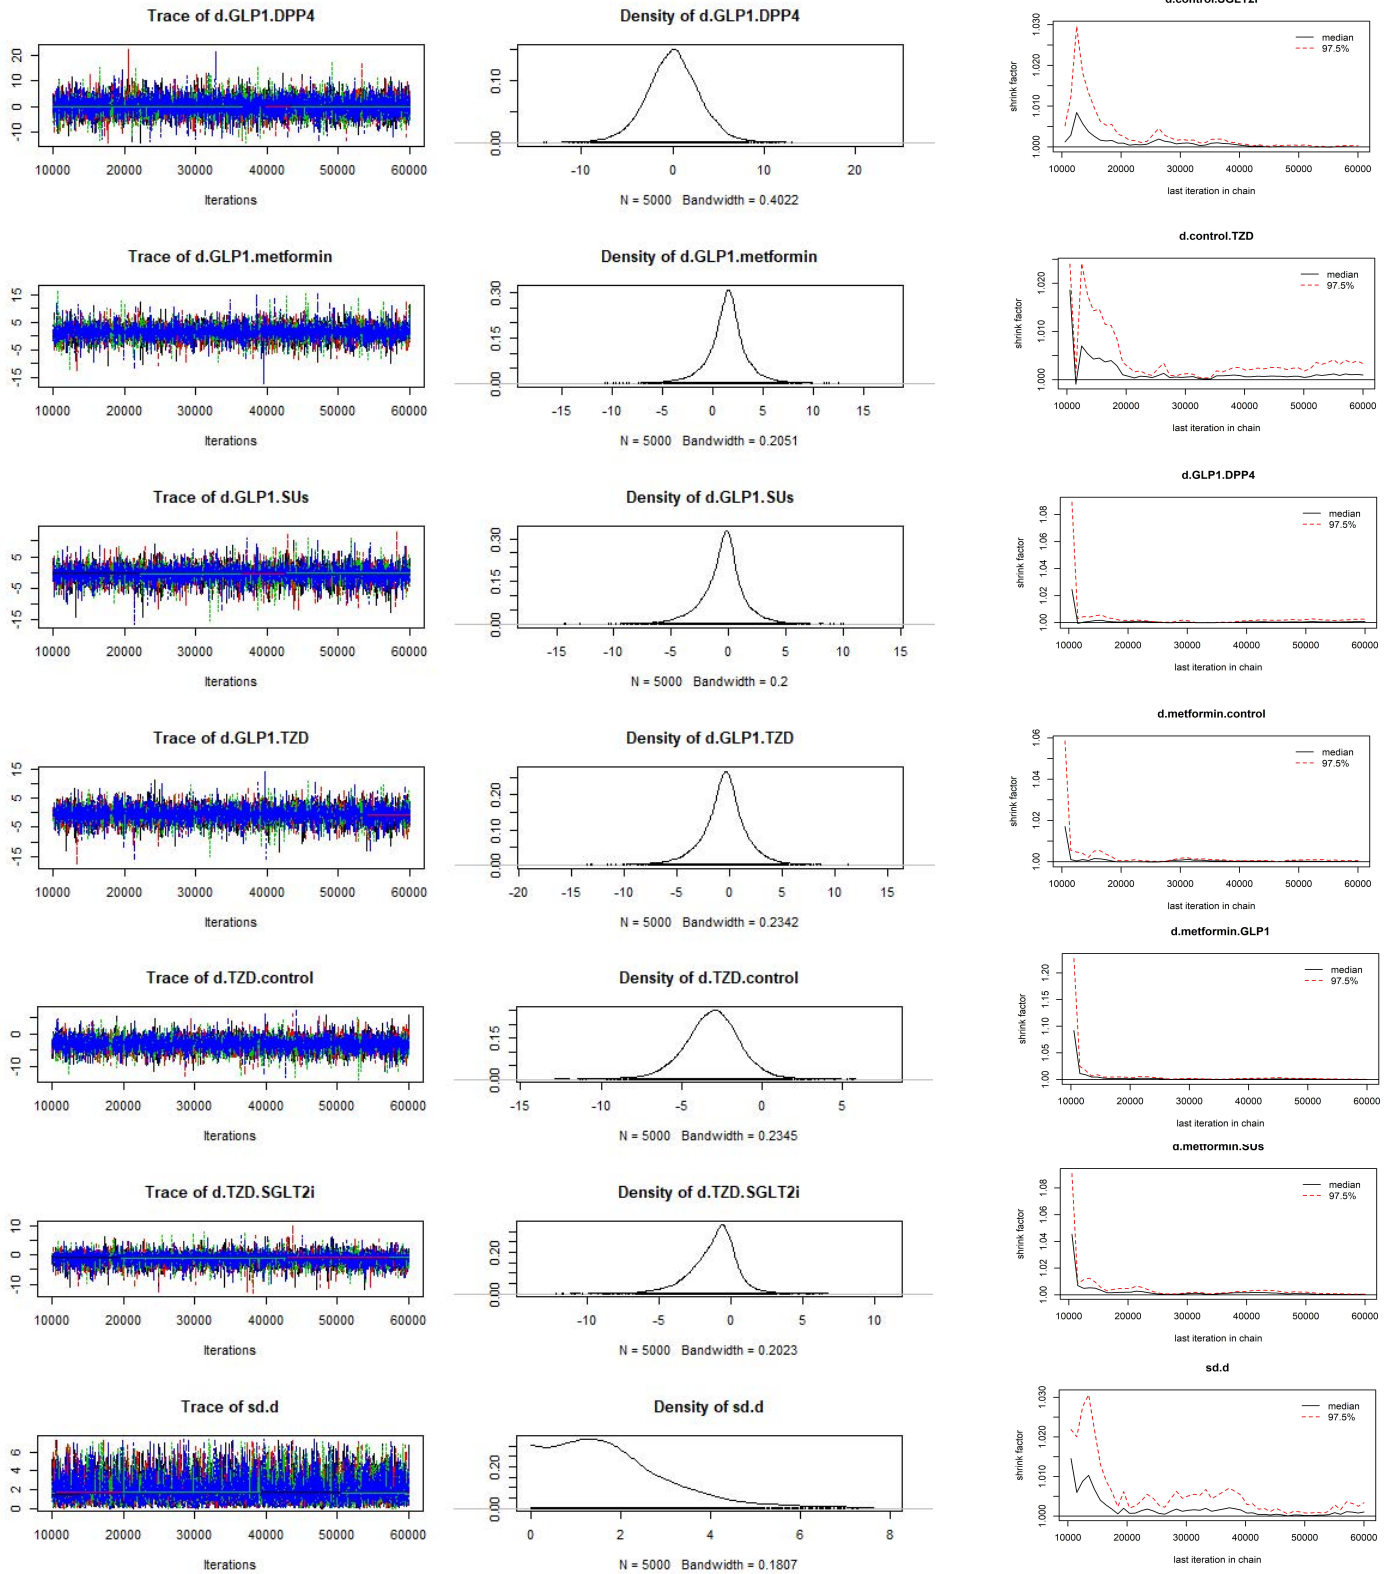

Fig.s15 AST

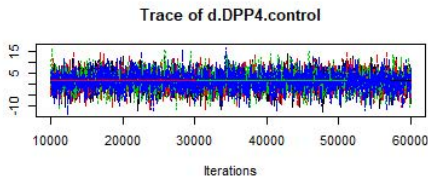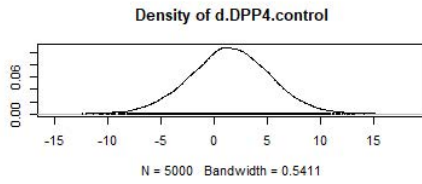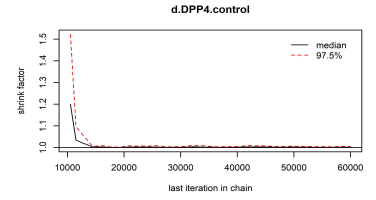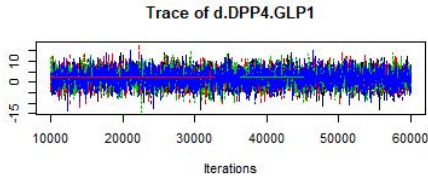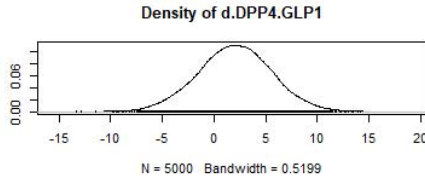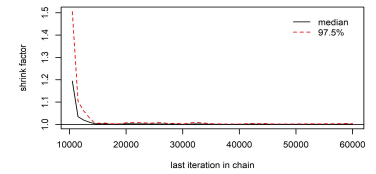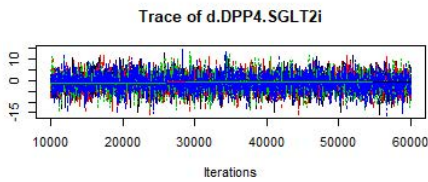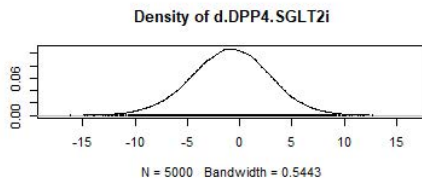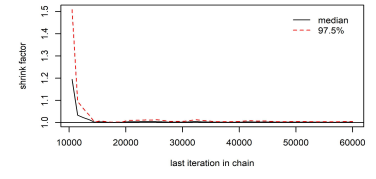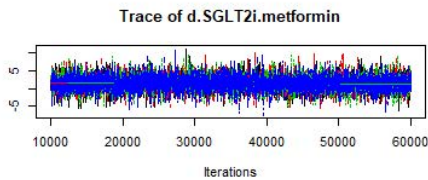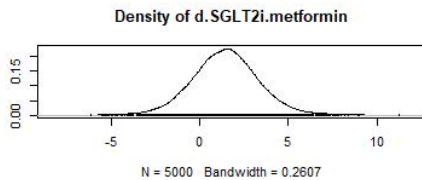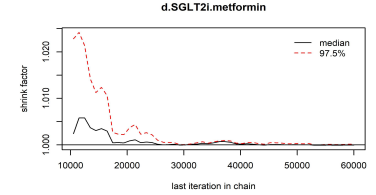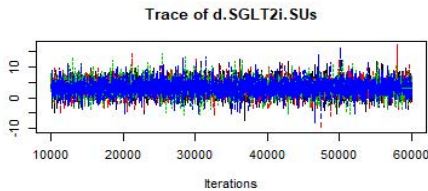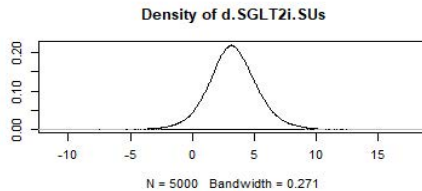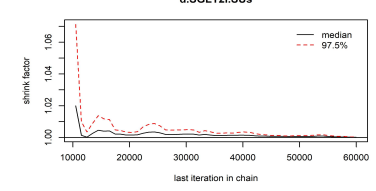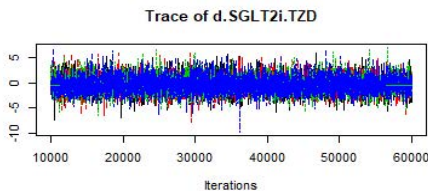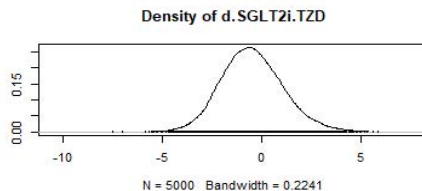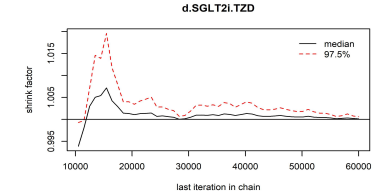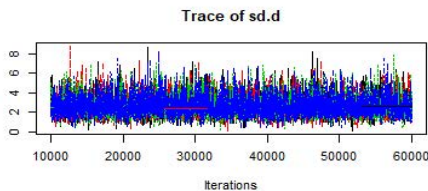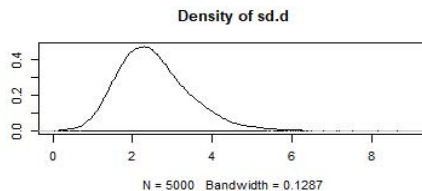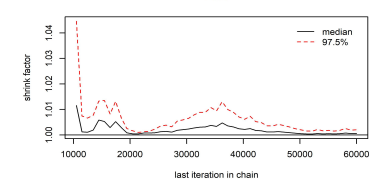



Fig.s16 ALT

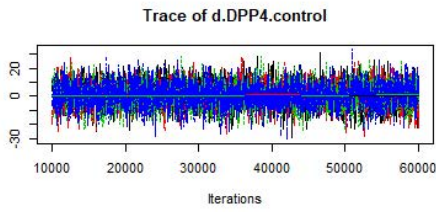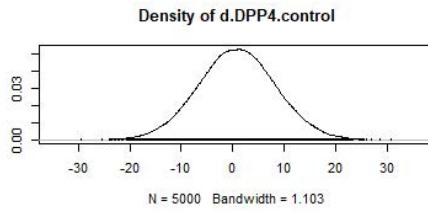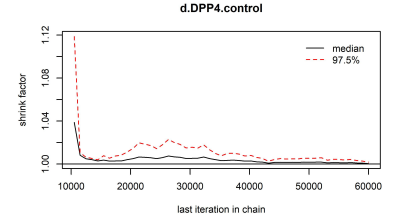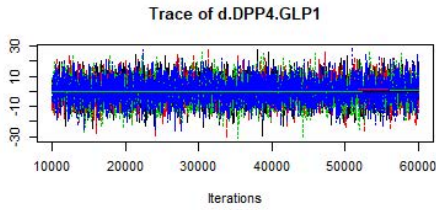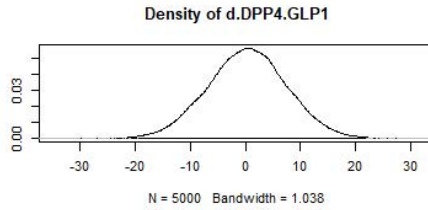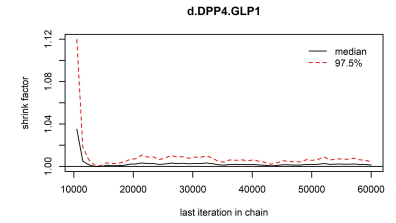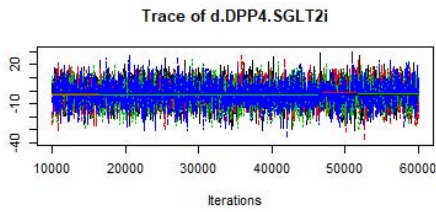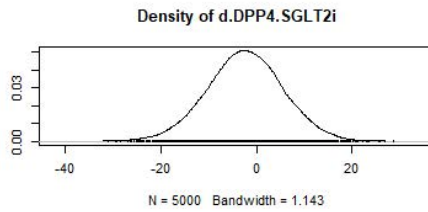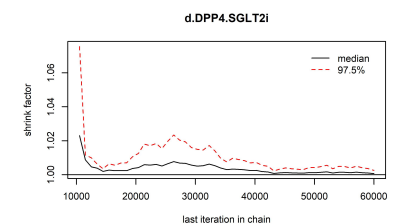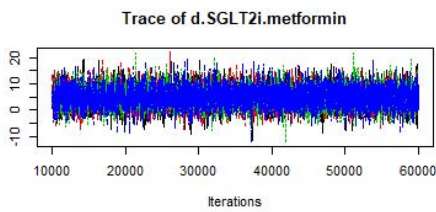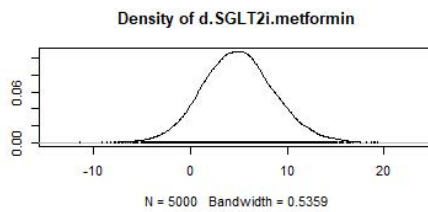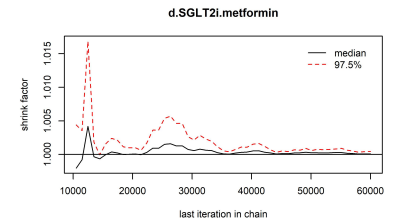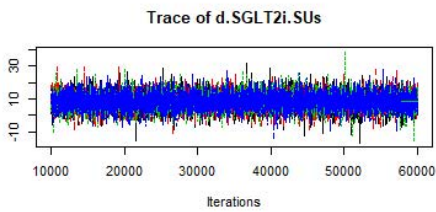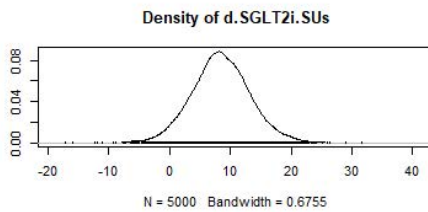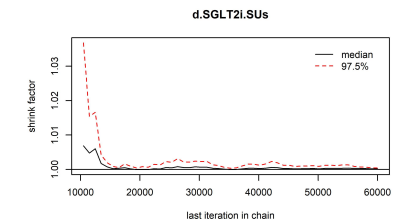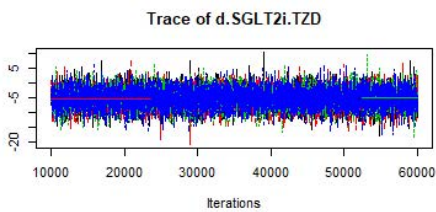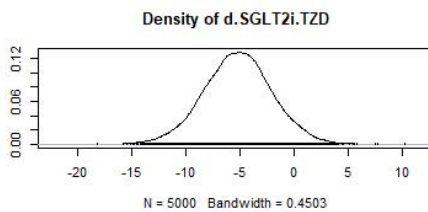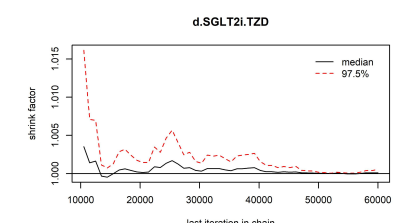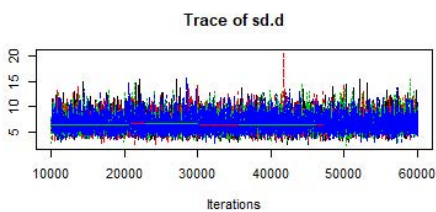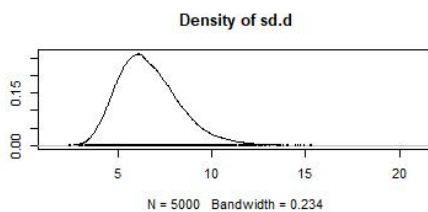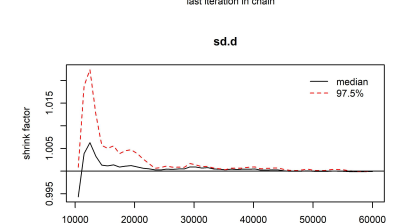

# Appendix 8 Network meta-analysis treatment estimates

The columns present the row drug class compared to the column drug class. The rows present the row drug class compared to the column drug class. The effect estimates are expressed as Mean difference and 95% confidence intervals. For example, the Mean Different for HOMA-IR with SGLT-2 inhibitors compared to GLP-1 receptor agonists is 1.217 (95% confidence interval -0.08694 to 2.21). For the reverse, the effect of a GLP-1 receptor compared to SGLT-2 inhibitor on the Mean difference of HOMA-IR is -1.217 (95% confidence interval -2.21 to 0.08694).

| 1. HOMA-IR             |                          |                          |                          |                           |                          |                         |
|------------------------|--------------------------|--------------------------|--------------------------|---------------------------|--------------------------|-------------------------|
| DPP4                   | -1.763 (-3.346, -0.1302) | -0.5655 (-2.243, 1.049)  | -0.6917 (-2.586, 1.1)    | -1.299 (-2.952, 0.3708)   | -0.2021 (-1.802, 1.379)  | 0.1973 (-1.75, 2.127)   |
| 1.763 (0.1302, 3.346)  | GLP1                     | 1.217 (-0.08694, 2.21)   | 1.091 (-0.4524, 2.336)   | 0.4713 (-0.6968, 1.503)   | 1.573 (0.495, 2.523)     | 1.953 (0.4605, 3.417)   |
| 0.5655 (-1.049, 2.243) | -1.217 (-2.21, 0.08694)  | SGLT2i                   | -0.1469 (-1.095, 0.9078) | -0.7547 (-1.367, 0.09404) | 0.342 (-0.218, 1.156)    | 0.7418 (-0.3898, 2.08)  |
| 0.6917 (-1.1, 2.586)   | -1.091 (-2.336, 0.4524)  | 0.1469 (-0.9078, 1.095)  | SUs                      | -0.6185 (-1.537, 0.4586)  | 0.4743 (-0.5714, 1.696)  | 0.873 (-0.5201, 2.447)  |
| 1.299 (-0.3708, 2.952) | -0.4713 (-1.503, 0.6968) | 0.7547 (-0.09404, 1.367) | 0.6185 (-0.4586, 1.537)  | TZD                       | 1.094 (0.3171, 1.911)    | 1.484 (0.2217, 2.809)   |
| 0.2021 (-1.379, 1.802) | -1.573 (-2.523, -0.495)  | -0.342 (-1.156, 0.218)   | -0.4743 (-1.696, 0.5714) | -1.094 (-1.911, -0.3171)  | control                  | 0.3842 (-0.7482, 1.543) |
| -0.1973 (-2.127, 1.75) | -1.953 (-3.417, -0.4605) | -0.7418 (-2.08, 0.3898)  | -0.873 (-2.447, 0.5201)  | -1.484 (-2.809, -0.2217)  | -0.3842 (-1.543, 0.7482) | metformin               |

| 2.1 VAT                    |                            |                            |                            |                           |                           |                          |
|----------------------------|----------------------------|----------------------------|----------------------------|---------------------------|---------------------------|--------------------------|
| DPP4                       | 0.1052 (-0.2597, 0.4755)   | 0.667 (0.09296, 1.207)     | 0.7239 (0.1003, 1.366)     | 0.7592 (0.2121, 1.376)    | 0.7433 (0.2351, 1.256)    | 0.8659 (0.09067, 1.617)  |
| -0.1052 (-0.4755, 0.2597)  | GLP1                       | 0.5599 (0.1312, 0.9613)    | 0.6189 (0.1122, 1.143)     | 0.6541 (0.2396, 1.137)    | 0.6365 (0.2838, 0.9921)   | 0.7602 (0.08004, 1.423)  |
| -0.667 (-1.207, -0.09296)  | -0.5599 (-0.9613, -0.1312) | SGLT2i                     | 0.05377 (-0.2325, 0.399)   | 0.09172 (-0.0719, 0.3568) | 0.07798 (-0.1199, 0.3076) | 0.2019 (-0.3369, 0.7445) |
| -0.7239 (-1.366, -0.1003)  | -0.6189 (-1.143, -0.1122)  | -0.05377 (-0.399, 0.2325)  | SUs                        | 0.0315 (-0.2537, 0.379)   | 0.01983 (-0.3592, 0.3817) | 0.1401 (-0.4904, 0.7446) |
| -0.7592 (-1.376, -0.2121)  | -0.6541 (-1.137, -0.2396)  | -0.09172 (-0.3568, 0.0719) | -0.0315 (-0.379, 0.2537)   | TZD                       | -0.01682 (-0.324, 0.2263) | 0.1007 (-0.5022, 0.6573) |
| -0.7433 (-1.256, -0.2351)  | -0.6365 (-0.9921, -0.2838) | -0.07798 (-0.3076, 0.1199) | -0.01983 (-0.3817, 0.3592) | 0.01682 (-0.2263, 0.324)  | control                   | 0.1225 (-0.4624, 0.6931) |
| -0.8659 (-1.617, -0.09067) | -0.7602 (-1.423, -0.08004) | -0.2019 (-0.7445, 0.3369)  | -0.1401 (-0.7446, 0.4904)  | -0.1007 (-0.6573, 0.5022) | -0.1225 (-0.6931, 0.4624) | metformin                |

| 2.2 SAT                    |                           |                           |                          |                             |
|----------------------------|---------------------------|---------------------------|--------------------------|-----------------------------|
| DPP4                       | -0.187 (-0.7722, 0.4037)  | -0.3708 (-1.401, 0.672)   | -0.162 (-1.433, 1.123)   | -0.009651 (-0.8366, 0.8209) |
| 0.187 (-0.4037, 0.7722)    | GLP1                      | -0.1841 (-1.03, 0.6687)   | 0.02507 (-1.097, 1.169)  | 0.1761 (-0.4034, 0.7581)    |
| 0.3708 (-0.672, 1.401)     | 0.1841 (-0.6687, 1.03)    | SGLT2i                    | 0.2102 (-0.5351, 0.9574) | 0.3603 (-0.2604, 0.9788)    |
| 0.162 (-1.123, 1.433)      | -0.02507 (-1.169, 1.097)  | -0.2102 (-0.9574, 0.5351) | TZD                      | 0.1493 (-0.8213, 1.118)     |
| 0.009651 (-0.8209, 0.8366) | -0.1761 (-0.7581, 0.4034) | -0.3603 (-0.9788, 0.2604) | -0.1493 (-1.118, 0.8213) | control                     |

| 2.3 BMI                 |                          |                          |                        |                         |                          |                         |
|-------------------------|--------------------------|--------------------------|------------------------|-------------------------|--------------------------|-------------------------|
| DPP4                    | -0.5892 (-2.907, 1.574)  | -0.295 (-2.805, 2.198)   | 1.271 (-1.712, 4.158)  | 0.9481 (-1.557, 3.545)  | 0.6676 (-1.739, 3.096)   | -0.467 (-2.948, 2.067)  |
| 0.5892 (-1.574, 2.907)  | GLP1                     | 0.3021 (-1.544, 2.305)   | 1.836 (-0.1381, 4.009) | 1.557 (-0.03525, 3.335) | 1.262 (-0.2183, 2.933)   | 0.1171 (-1.329, 1.845)  |
| 0.295 (-2.198, 2.805)   | -0.3021 (-2.305, 1.544)  | SGLT2i                   | 1.557 (-0.9426, 3.971) | 1.242 (-0.4719, 2.998)  | 0.9637 (-0.4232, 2.385)  | -0.1823 (-1.812, 1.523) |
| -1.271 (-4.158, 1.712)  | -1.836 (-4.009, 0.1381)  | -1.557 (-3.971, 0.9426)  | SUs                    | -0.3178 (-2.614, 2.087) | -0.6037 (-2.783, 1.693)  | -1.756 (-3.737, 0.4048) |
| -0.9481 (-3.545, 1.557) | -1.557 (-3.335, 0.03525) | -1.242 (-2.998, 0.4719)  | 0.3178 (-2.087, 2.614) | TZD                     | -0.2825 (-1.415, 0.8711) | -1.431 (-2.919, 0.11)   |
| -0.6676 (-3.096, 1.739) | -1.262 (-2.933, 0.2183)  | -0.9637 (-2.385, 0.4232) | 0.6037 (-1.693, 2.783) | 0.2825 (-0.8711, 1.415) | control                  | -1.154 (-2.378, 0.1326) |
| 0.467 (-2.067, 2.948)   | -0.1171 (-1.845, 1.329)  | 0.1823 (-1.523, 1.812)   | 1.756 (-0.4048, 3.737) | 1.431 (-0.11, 2.919)    | 1.154 (-0.1326, 2.378)   | metformin               |



## 2.4 Weight

|                         |                          |                         |                          |                         |                         |                         |
|-------------------------|--------------------------|-------------------------|--------------------------|-------------------------|-------------------------|-------------------------|
| DPP4                    | -3.401 (-9.386, 2.615)   | -2.051 (-8.199, 4.12)   | 0.6672 (-5.347, 6.746)   | 1.372 (-4.761, 7.528)   | -1.006 (-7.241, 5.326)  | -7.488 (-13.65, -1.429) |
| 3.401 (-2.615, 9.386)   | GLP1                     | 1.327 (-0.4301, 3.062)  | 4.065 (2.868, 5.263)     | 4.783 (3.037, 6.469)    | 2.394 (0.1637, 4.625)   | -4.094 (-5.274, -2.933) |
| 2.051 (-4.12, 8.199)    | -1.327 (-3.062, 0.4301)  | SGLT2i                  | 2.735 (1.37, 4.079)      | 3.439 (2.051, 4.851)    | 1.059 (-0.9306, 3.056)  | -5.425 (-7.299, -3.579) |
| -0.6672 (-6.746, 5.347) | -4.065 (-5.263, -2.868)  | -2.735 (-4.079, -1.37)  | SUs                      | 0.7122 (-0.6773, 2.093) | -1.67 (-3.715, 0.4013)  | -8.162 (-9.539, -6.819) |
| -1.372 (-7.528, 4.761)  | -4.783 (-6.469, -3.037)  | -3.439 (-4.851, -2.051) | -0.7122 (-2.093, 0.6773) | TZD                     | -2.39 (-4.206, -0.5505) | -8.874 (-10.74, -7.011) |
| 1.006 (-5.326, 7.241)   | -2.394 (-4.625, -0.1637) | -1.059 (-3.056, 0.9306) | 1.67 (-0.4013, 3.715)    | 2.39 (0.5505, 4.206)    | control                 | -6.499 (-8.822, -4.129) |
| 7.488 (1.429, 13.65)    | 4.094 (2.933, 5.274)     | 5.425 (3.579, 7.299)    | 8.162 (6.819, 9.539)     | 8.874 (7.011, 10.74)    | 6.499 (4.129, 8.822)    | metformin               |

## 2.5 Leptin

|                        |                        |                        |                         |                        |
|------------------------|------------------------|------------------------|-------------------------|------------------------|
| DPP4                   | -1.81 (-15.36, 11.16)  | 5.735 (-11.1, 22.37)   | 4.768 (-8.161, 17.64)   | 1.048 (-15.73, 17.94)  |
| 1.81 (-11.16, 15.36)   | SGLT2i                 | 7.304 (-6.874, 22.9)   | 6.479 (-3.127, 17.4)    | 2.754 (-11.77, 18.65)  |
| -5.735 (-22.37, 11.1)  | -7.304 (-22.9, 6.874)  | TZD                    | -0.9193 (-11.89, 9.823) | -4.608 (-20.03, 11.24) |
| -4.768 (-17.64, 8.161) | -6.479 (-17.4, 3.127)  | 0.9193 (-9.823, 11.89) | control                 | -3.679 (-14.9, 7.772)  |
| -1.048 (-17.94, 15.73) | -2.754 (-18.65, 11.77) | 4.608 (-11.24, 20.03)  | 3.679 (-7.772, 14.9)    | metformin              |

## 2.6 Adiponectin

|                         |                        |                        |                         |                        |                       |                        |
|-------------------------|------------------------|------------------------|-------------------------|------------------------|-----------------------|------------------------|
| DPP4                    | 4.38 (-4.214, 13.13)   | -4.81 (-14.82, 5.14)   | 0.8245 (-7.204, 8.701)  | 1.697 (-8.955, 12.57)  | 7.635 (-1.298, 17.37) | -2.62 (-10.94, 5.638)  |
| -4.38 (-13.13, 4.214)   | GLP1                   | -9.2 (-22.58, 3.954)   | -3.575 (-15.34, 8.045)  | -2.669 (-16.26, 10.86) | 3.283 (-9.084, 16.23) | -7.007 (-18.85, 5.033) |
| 4.81 (-5.14, 14.82)     | 9.2 (-3.954, 22.58)    | Metformin              | 5.639 (-6.919, 18.36)   | 6.512 (-7.702, 21.28)  | 12.44 (-0.676, 26.24) | 2.192 (-3.573, 7.773)  |
| -0.8245 (-8.701, 7.204) | 3.575 (-8.045, 15.34)  | -5.639 (-18.36, 6.919) | SGLT2i                  | 0.8563 (-5.998, 8.19)  | 6.813 (2.403, 11.78)  | -3.402 (-14.67, 7.91)  |
| -1.697 (-12.57, 8.955)  | 2.669 (-10.86, 16.26)  | -6.512 (-21.28, 7.702) | -0.8563 (-8.19, 5.998)  | SUs                    | 5.927 (-1.114, 13.14) | -4.311 (-18.1, 8.959)  |
| -7.635 (-17.37, 1.298)  | -3.283 (-16.23, 9.084) | -12.44 (-26.24, 0.676) | -6.813 (-11.78, -2.403) | -5.927 (-13.14, 1.114) | TZD                   | -10.23 (-22.94, 1.637) |
| 2.62 (-5.638, 10.94)    | 7.007 (-5.033, 18.85)  | -2.192 (-7.773, 3.573) | 3.402 (-7.91, 14.67)    | 4.311 (-8.959, 18.1)   | 10.23 (-1.637, 22.94) | control                |

## 3.1 FBS

|                            |                            |                           |                          |                             |                           |                          |
|----------------------------|----------------------------|---------------------------|--------------------------|-----------------------------|---------------------------|--------------------------|
| DPP4                       | -0.1763 (-1.174, 0.7811)   | 0.1568 (-0.6753, 1.042)   | 0.7721 (-0.2653, 1.851)  | 0.01933 (-0.9075, 0.9964)   | 0.4836 (-0.4524, 1.455)   | 0.3421 (-0.5862, 1.378)  |
| 0.1763 (-0.7811, 1.174)    | GLP1                       | 0.3333 (-0.371, 1.106)    | 0.9475 (0.2163, 1.743)   | 0.1969 (-0.4768, 0.934)     | 0.6627 (0.02059, 1.377)   | 0.5138 (-0.1253, 1.285)  |
| -0.1568 (-1.042, 0.6753)   | -0.3333 (-1.106, 0.371)    | SGLT2i                    | 0.6151 (-0.08719, 1.302) | -0.1353 (-0.6372, 0.3551)   | 0.33 (-0.1701, 0.8322)    | 0.1836 (-0.3608, 0.7644) |
| -0.7721 (-1.851, 0.2653)   | -0.9475 (-1.743, -0.2163)  | -0.6151 (-1.302, 0.08719) | SUs                      | -0.7511 (-1.433, -0.07856)  | -0.2872 (-0.9688, 0.4084) | -0.435 (-1.084, 0.2972)  |
| -0.01933 (-0.9964, 0.9075) | -0.1969 (-0.934, 0.4768)   | 0.1353 (-0.3551, 0.6372)  | 0.7511 (0.07856, 1.433)  | TZD                         | 0.4634 (0.04479, 0.9085)  | 0.3161 (-0.1644, 0.8742) |
| -0.4836 (-1.455, 0.4524)   | -0.6627 (-1.377, -0.02059) | -0.33 (-0.8322, 0.1701)   | 0.2872 (-0.4084, 0.9688) | -0.4634 (-0.9085, -0.04479) | control                   | -0.1463 (-0.551, 0.3032) |
| -0.3421 (-1.378, 0.5862)   | -0.5138 (-1.285, 0.1253)   | -0.1836 (-0.7644, 0.3608) | 0.435 (-0.2972, 1.084)   | -0.3161 (-0.8742, 0.1644)   | 0.1463 (-0.3032, 0.551)   | metformin                |

## 3.2 TG

|                             |                            |                             |                           |                            |                            |                            |
|-----------------------------|----------------------------|-----------------------------|---------------------------|----------------------------|----------------------------|----------------------------|
| DPP4                        | -0.04466 (-0.6562, 0.5777) | 0.5624 (-0.00302, 1.14)     | 0.7538 (0.112, 1.423)     | 0.4482 (-0.1348, 1.054)    | 0.5682 (0.005976, 1.149)   | 0.6897 (0.08952, 1.312)    |
| 0.04466 (-0.5777, 0.6562)   | GLP1                       | 0.6065 (0.1166, 1.095)      | 0.8007 (0.2218, 1.389)    | 0.4903 (0.01954, 1.003)    | 0.6097 (0.1879, 1.056)     | 0.7261 (0.2626, 1.245)     |
| -0.5624 (-1.14, 0.00302)    | -0.6065 (-1.095, -0.1166)  | SGLT2i                      | 0.1886 (-0.1544, 0.5722)  | -0.1201 (-0.3266, 0.1461)  | 0.002603 (-0.2344, 0.2785) | 0.117 (-0.1777, 0.4962)    |
| -0.7538 (-1.423, -0.112)    | -0.8007 (-1.389, -0.2218)  | -0.1886 (-0.5722, 0.1544)   | SUs                       | -0.3111 (-0.6563, 0.07642) | -0.1902 (-0.5851, 0.2227)  | -0.07766 (-0.4987, 0.4179) |
| -0.4482 (-1.054, 0.1348)    | -0.4903 (-1.003, -0.01954) | 0.1201 (-0.1461, 0.3266)    | 0.3111 (-0.07642, 0.6563) | TZD                        | 0.118 (-0.1306, 0.3521)    | 0.2335 (-0.05576, 0.5534)  |
| -0.5682 (-1.149, -0.005976) | -0.6097 (-1.056, -0.1879)  | -0.002603 (-0.2785, 0.2344) | 0.1902 (-0.2227, 0.5851)  | -0.118 (-0.3521, 0.1306)   | control                    | 0.1146 (-0.09777, 0.3733)  |
| -0.6897 (-1.312, -0.08952)  | -0.7261 (-1.245, -0.2626)  | -0.117 (-0.4962, 0.1777)    | 0.07766 (-0.4179, 0.4987) | -0.2335 (-0.5534, 0.05576) | -0.1146 (-0.3733, 0.09777) | metformin                  |

### 3.3 TC

|                         |                            |                            |                           |                           |                            |
|-------------------------|----------------------------|----------------------------|---------------------------|---------------------------|----------------------------|
| DPP4                    | -0.3912 (-1.116, 0.3134)   | -0.484 (-1.47, 0.4763)     | -0.3431 (-1.298, 0.5691)  | -0.1282 (-1.077, 0.779)   | -0.1924 (-1.166, 0.7277)   |
| 0.3912 (-0.3134, 1.116) | GLP1                       | -0.08991 (-0.7504, 0.5684) | 0.04941 (-0.5642, 0.6399) | 0.2627 (-0.3442, 0.8718)  | 0.2002 (-0.45, 0.8274)     |
| 0.484 (-0.4763, 1.47)   | 0.08991 (-0.5684, 0.7504)  | SGLT2i                     | 0.143 (-0.1926, 0.4692)   | 0.3536 (-0.03457, 0.7543) | 0.2944 (-0.1616, 0.7157)   |
| 0.3431 (-0.5691, 1.298) | -0.04941 (-0.6399, 0.5642) | -0.143 (-0.4692, 0.1926)   | TZD                       | 0.2129 (-0.1043, 0.5528)  | 0.1495 (-0.2266, 0.5057)   |
| 0.1282 (-0.779, 1.077)  | -0.2627 (-0.8718, 0.3442)  | -0.3536 (-0.7543, 0.03457) | -0.2129 (-0.5528, 0.1043) | control                   | -0.05701 (-0.3202, 0.1351) |
| 0.1924 (-0.7277, 1.166) | -0.2002 (-0.8274, 0.45)    | -0.2944 (-0.7157, 0.1616)  | -0.1495 (-0.5057, 0.2266) | 0.05701 (-0.1351, 0.3202) | metformin                  |

### 3.4 HDL

|                            |                            |                             |                             |                            |                             |                             |
|----------------------------|----------------------------|-----------------------------|-----------------------------|----------------------------|-----------------------------|-----------------------------|
| DPP4                       | 0.04482 (-0.1457, 0.2488)  | 0.1151 (-0.09226, 0.3096)   | 0.03138 (-0.2034, 0.2525)   | 0.1793 (-0.04081, 0.3779)  | 0.1008 (-0.1131, 0.2949)    | 0.08238 (-0.1464, 0.2874)   |
| -0.04482 (-0.2488, 0.1457) | GLP1                       | 0.07226 (-0.1192, 0.2283)   | -0.01163 (-0.203, 0.1449)   | 0.1351 (-0.05672, 0.2865)  | 0.05646 (-0.1292, 0.2042)   | 0.03753 (-0.1516, 0.185)    |
| -0.1151 (-0.3096, 0.09226) | -0.07226 (-0.2283, 0.1192) | SGLT2i                      | -0.08456 (-0.2424, 0.07509) | 0.06453 (-0.05244, 0.1656) | -0.01472 (-0.1334, 0.09208) | -0.0339 (-0.1828, 0.1051)   |
| -0.03138 (-0.2525, 0.2034) | 0.01163 (-0.1449, 0.203)   | 0.08456 (-0.07509, 0.2424)  | SUs                         | 0.1503 (-0.01477, 0.2926)  | 0.07127 (-0.09585, 0.2186)  | 0.05087 (-0.1151, 0.2028)   |
| -0.1793 (-0.3779, 0.04081) | -0.1351 (-0.2865, 0.05672) | -0.06453 (-0.1656, 0.05244) | -0.1503 (-0.2926, 0.01477)  | TZD                        | -0.07995 (-0.1728, 0.01963) | -0.09939 (-0.2244, 0.03338) |
| -0.1008 (-0.2949, 0.1131)  | -0.05646 (-0.2042, 0.1292) | 0.01472 (-0.09208, 0.1334)  | -0.07127 (-0.2186, 0.09585) | 0.07995 (-0.01963, 0.1728) | control                     | -0.01946 (-0.1279, 0.09052) |
| -0.08238 (-0.2874, 0.1464) | -0.03753 (-0.185, 0.1516)  | 0.0339 (-0.1051, 0.1828)    | -0.05087 (-0.2028, 0.1151)  | 0.09939 (-0.03338, 0.2244) | 0.01946 (-0.09052, 0.1279)  | metformin                   |

### 3.5 LDL

|                            |                            |                            |                          |                            |                             |                             |
|----------------------------|----------------------------|----------------------------|--------------------------|----------------------------|-----------------------------|-----------------------------|
| DPP4                       | -0.0507 (-0.58, 0.4943)    | -0.1132 (-0.642, 0.4422)   | 0.1429 (-0.4803, 0.7895) | -0.1405 (-0.6782, 0.4111)  | -0.006923 (-0.5067, 0.5297) | -0.05569 (-0.6345, 0.527)   |
| 0.0507 (-0.4943, 0.58)     | GLP1                       | -0.06108 (-0.5116, 0.4039) | 0.1941 (-0.2946, 0.6866) | -0.09074 (-0.5205, 0.3499) | 0.04546 (-0.3552, 0.4657)   | -0.003342 (-0.4563, 0.4371) |
| 0.1132 (-0.4422, 0.642)    | 0.06108 (-0.4039, 0.5116)  | SGLT2i                     | 0.2552 (-0.219, 0.7076)  | -0.02801 (-0.3419, 0.272)  | 0.1069 (-0.2049, 0.4214)    | 0.05784 (-0.3705, 0.4588)   |
| -0.1429 (-0.7895, 0.4803)  | -0.1941 (-0.6866, 0.2946)  | -0.2552 (-0.7076, 0.219)   | SUs                      | -0.2844 (-0.7336, 0.1792)  | -0.1504 (-0.5965, 0.3305)   | -0.1977 (-0.6768, 0.2813)   |
| 0.1405 (-0.4111, 0.6782)   | 0.09074 (-0.3499, 0.5205)  | 0.02801 (-0.272, 0.3419)   | 0.2844 (-0.1792, 0.7336) | TZD                        | 0.1369 (-0.1408, 0.4292)    | 0.08749 (-0.3031, 0.462)    |
| 0.006923 (-0.5297, 0.5067) | -0.04546 (-0.4657, 0.3552) | -0.1069 (-0.4214, 0.2049)  | 0.1504 (-0.3305, 0.5965) | -0.1369 (-0.4292, 0.1408)  | control                     | -0.04876 (-0.3874, 0.2553)  |
| 0.05569 (-0.527, 0.6345)   | 0.003342 (-0.4371, 0.4563) | -0.05784 (-0.4588, 0.3705) | 0.1977 (-0.2813, 0.6768) | -0.08749 (-0.462, 0.3031)  | 0.04876 (-0.2553, 0.3874)   | metformin                   |

### 4.1 SBP

|                         |                          |                          |                       |                         |                          |                        |
|-------------------------|--------------------------|--------------------------|-----------------------|-------------------------|--------------------------|------------------------|
| DPP4                    | -1.599 (-10.73, 7.437)   | -1.155 (-12.83, 10.68)   | 4.963 (-5.828, 16.28) | -0.4282 (-10.82, 12.03) | -0.07337 (-11.43, 12.25) | 2.725 (-8.298, 14.05)  |
| 1.599 (-7.437, 10.73)   | GLP1                     | 0.4598 (-7.142, 8.146)   | 6.502 (0.4226, 13.23) | 1.03 (-4.787, 9.146)    | 1.486 (-5.709, 9.753)    | 4.323 (-2.135, 11.03)  |
| 1.155 (-10.68, 12.83)   | -0.4598 (-8.146, 7.142)  | SGLT2i                   | 6.019 (0.2878, 12.45) | 0.549 (-3.473, 6.993)   | 1.029 (-4.853, 7.83)     | 3.861 (-3.332, 11.46)  |
| -4.963 (-16.28, 5.828)  | -6.502 (-13.23, -0.4226) | -6.019 (-12.45, -0.2878) | SUs                   | -5.538 (-10.27, 1.237)  | -5.063 (-11.57, 1.993)   | -2.196 (-8.437, 3.984) |
| 0.4282 (-12.03, 10.82)  | -1.03 (-9.146, 4.787)    | -0.549 (-6.993, 3.473)   | 5.538 (-1.237, 10.27) | TZD                     | 0.2637 (-5.908, 5.795)   | 3.268 (-4.417, 8.977)  |
| 0.07337 (-12.25, 11.43) | -1.486 (-9.753, 5.709)   | -1.029 (-7.83, 4.853)    | 5.063 (-1.993, 11.57) | -0.2637 (-5.795, 5.908) | control                  | 2.811 (-3.965, 8.927)  |
| -2.725 (-14.05, 8.298)  | -4.323 (-11.03, 2.135)   | -3.861 (-11.46, 3.332)   | 2.196 (-3.984, 8.437) | -3.268 (-8.977, 4.417)  | -2.811 (-8.927, 3.965)   | metformin              |

### 4.2 DBP

|                         |                          |                         |                         |                          |                         |                       |
|-------------------------|--------------------------|-------------------------|-------------------------|--------------------------|-------------------------|-----------------------|
| DPP4                    | -0.05192 (-5.977, 6.035) | -1.499 (-10.19, 5.598)  | -0.4318 (-8.099, 6.594) | -0.4508 (-8.021, 6.808)  | -3.539 (-11.5, 3.816)   | 1.436 (-6.108, 8.706) |
| 0.05192 (-6.035, 5.977) | GLP1                     | -1.311 (-7.328, 2.683)  | -0.324 (-4.833, 3.435)  | -0.3831 (-5.203, 3.839)  | -3.457 (-8.709, 0.8769) | 1.505 (-3.067, 5.585) |
| 1.499 (-5.598, 10.19)   | 1.311 (-2.683, 7.328)    | SGLT2i                  | 0.9578 (-2.416, 5.593)  | 0.955 (-1.713, 5.157)    | -1.99 (-5.526, 2.272)   | 2.841 (-0.8969, 8.17) |
| 0.4318 (-6.594, 8.099)  | 0.324 (-3.435, 4.833)    | -0.9578 (-5.593, 2.416) | SUs                     | -0.04769 (-3.613, 3.879) | -3.059 (-7.497, 1.12)   | 1.838 (-1.94, 6.017)  |
| 0.4508 (-6.808, 8.021)  | 0.3831 (-3.839, 5.203)   | -0.955 (-5.157, 1.713)  | 0.04769 (-3.879, 3.613) | TZD                      | -3.059 (-6.78, 0.3173)  | 1.896 (-2.366, 6.196) |
| 3.539 (-3.816, 11.5)    | 3.457 (-0.8769, 8.709)   | 1.99 (-2.272, 5.526)    | 3.059 (-1.12, 7.497)    | 3.059 (-0.3173, 6.78)    | control                 | 4.944 (1.389, 8.998)  |
| -1.436 (-8.706, 6.108)  | -1.505 (-5.585, 3.067)   | -2.841 (-8.17, 0.8969)  | -1.838 (-6.017, 1.94)   | -1.896 (-6.196, 2.366)   | -4.944 (-8.998, -1.389) | metformin             |

**5.1 AST**

|                         |                        |                         |                        |                         |                         |                         |
|-------------------------|------------------------|-------------------------|------------------------|-------------------------|-------------------------|-------------------------|
| DPP4                    | 2.037 (-5.129, 9.062)  | -0.8484 (-8.586, 6.503) | 2.423 (-5.523, 10.02)  | -1.335 (-9.141, 6.31)   | 1.456 (-6.152, 8.91)    | 0.5946 (-7.288, 8.002)  |
| -2.037 (-9.062, 5.129)  | GLP1                   | -2.892 (-7.797, 1.816)  | 0.3425 (-4.342, 5.04)  | -3.453 (-8.061, 1.71)   | -0.6425 (-4.777, 4.097) | -1.46 (-5.838, 2.93)    |
| 0.8484 (-6.503, 8.586)  | 2.892 (-1.816, 7.797)  | SGLT2i                  | 3.224 (-0.8646, 7.554) | -0.5248 (-3.355, 2.908) | 2.274 (-0.5881, 5.712)  | 1.441 (-2.363, 5.282)   |
| -2.423 (-10.02, 5.523)  | -0.3425 (-5.04, 4.342) | -3.224 (-7.554, 0.8646) | SUs                    | -3.806 (-7.673, 0.6829) | -0.9849 (-4.875, 3.485) | -1.791 (-5.976, 2.246)  |
| 1.335 (-6.31, 9.141)    | 3.453 (-1.71, 8.061)   | 0.5248 (-2.908, 3.355)  | 3.806 (-0.6829, 7.673) | TZD                     | 2.795 (-0.2527, 5.829)  | 1.94 (-2.086, 5.427)    |
| -1.456 (-8.91, 6.152)   | 0.6425 (-4.097, 4.777) | -2.274 (-5.712, 0.5881) | 0.9849 (-3.485, 4.875) | -2.795 (-5.829, 0.2527) | control                 | -0.8377 (-4.096, 1.889) |
| -0.5946 (-8.002, 7.288) | 1.46 (-2.93, 5.838)    | -1.441 (-5.282, 2.363)  | 1.791 (-2.246, 5.976)  | -1.94 (-5.427, 2.086)   | 0.8377 (-1.889, 4.096)  | metformin               |

**5.2 ALT**

|                         |                         |                        |                       |                         |                        |                        |
|-------------------------|-------------------------|------------------------|-----------------------|-------------------------|------------------------|------------------------|
| DPP4                    | 0.3774 (-14.01, 14.52)  | -2.343 (-18.23, 13.2)  | 6.099 (-10.81, 22.72) | -7.49 (-23.83, 7.97)    | 0.8563 (-14.2, 16.04)  | 2.642 (-12.89, 18.04)  |
| -0.3774 (-14.52, 14.01) | GLP1                    | -2.59 (-13.47, 7.701)  | 5.829 (-5.395, 16.84) | -7.816 (-18.89, 2.389)  | 0.5344 (-9.163, 10.18) | 2.274 (-7.667, 12.04)  |
| 2.343 (-13.2, 18.23)    | 2.59 (-7.701, 13.47)    | SGLT2i                 | 8.392 (-1.064, 18.31) | -5.228 (-11.57, 1.011)  | 3.136 (-2.86, 9.704)   | 4.895 (-2.186, 12.69)  |
| -6.099 (-22.72, 10.81)  | -5.829 (-16.84, 5.395)  | -8.392 (-18.31, 1.064) | SUs                   | -13.62 (-23.54, -4.163) | -5.317 (-14.89, 4.658) | -3.541 (-13.13, 6.486) |
| 7.49 (-7.97, 23.83)     | 7.816 (-2.389, 18.89)   | 5.228 (-1.011, 11.57)  | 13.62 (4.163, 23.54)  | TZD                     | 8.347 (2.538, 14.87)   | 10.12 (2.851, 18.06)   |
| -0.8563 (-16.04, 14.2)  | -0.5344 (-10.18, 9.163) | -3.136 (-9.704, 2.86)  | 5.317 (-4.658, 14.89) | -8.347 (-14.87, -2.538) | control                | 1.768 (-4.408, 8.035)  |
| -2.642 (-18.04, 12.89)  | -2.274 (-12.04, 7.667)  | -4.895 (-12.69, 2.186) | 3.541 (-6.486, 13.13) | -10.12 (-18.06, -2.851) | -1.768 (-8.035, 4.408) | metformin              |
